# Supplementary material for: Identification of QTL underlying the main stem related traits in a doubled haploid barley population
Source: Front Plant Sci. 2022 Dec 1;13:1063988. doi: 10.3389/fpls.2022.1063988 (PMC9751491; doi:10.3389/fpls.2022.1063988)
Supplement: Supplementary file 2 [file Table_2.xlsx]

## Sheet: Table S1
Table S1. QTLs for barley stem related traits identified in the DH populations in two years using single-environment QTL analysis.
Trait a	Year	Main QTL	Chr. b	Genetic Position (cM)	Left Marker	Physic Position (bp)	Right Marker	Physic Position (bp)	LOD	PVE c	Add d	CI e
UND	2021	qUND2-1	2H	94	2HL_2741060	541630495	M_230635_804	N/A	3.46	4.83	0.1	93.711-94.4105
		qUND2-3	2H	134	M_149956_1482	663437677	M_165611_94	671629490	6.92	9.94	0.14	133.6065-136.7935
		qUND3-1	3H	205	3_34191994	37469142	3HS_1093997	37177869	4.32	5.95	-0.1	204.4948-205.7444
		qUND4-1	4H	29	4HL_45045821	614726458	4HL_6409134	599964924	4.01	5.38	-0.1	28.9585-35.5015
		qUND4-2	4H	148	4_16553551	15498285	4HS_28564347	16168641	6	8.42	0.13	147.7155-148.359
		qUND7-1	7H	184	7HS_21827941	81887807	7HS_30257307	83769435	13.46	21.77	0.2	183.7472-184.0756
		qUND7-2	7H	209	7_31360519	29950008	7_28180957	29411274	4.58	6.25	-0.11	208.7796-209.4312
	2022	qUND2-2	2H	123	2_514353957	645373132	2HL_13648618	645218857	8.67	16.79	0.2	122.9775-123.4415
		qUND5-1	5H	22	GBM1176	9866452	5_13217441	13275486	3.03	5.82	-0.11	83.5996-83.7808
		qUND7-1	7H	184	7HS_30257307	83769435	7_87591581	75243869	3.5	6.26	0.12	184.0756-184.546
SND	2021	qSND2-1	2H	123	2_514353957	645373132	2HL_13648618	645218857	7.34	16.11	0.22	122.9775-123.4415
		qSND3-2	3H	79	3HL_21306461	532662956	3HL_21303890	N/A	3.87	8.18	-0.14	78.6892-79.186
	2022	qSND2-1	2H	123	2_514353957	645373132	2HL_13648618	645218857	10.11	18.99	0.23	122.9775-123.4415
		qSND3-1	3H	3	3_558269837	695723892	GBM1238	687765899	3.01	5.1	0.11	2.1552-3.2
		qSND5-1	5H	22	GBM1176	9866452	5_13217441	13275486	3.95	7.18	-0.13	21.0335-26.832
TND	2021	qTND2-1	2H	79	M_223185_603	473725143	M_167678_1523	460965640	9.82	17.84	0.23	78.981-79.797
		qTND3-2	3H	79	3HL_21306461	532662956	3HL_21303890	N/A	4.49	7.45	-0.15	78.6892-79.186
		qTND5-1	5H	0	5HS_7374618	2568671	5_54803	433302	3.94	6.36	-0.14	0-0.842
		qTND5-3	5H	153	5HL_10821972	379450745	5HL_36003694	428146161	3.6	5.85	-0.14	152.6225-153.6865
	2022	qTND2-2	2H	123	2_514353957	645373132	2HL_13648618	645218857	11.01	21.05	0.29	122.9775-123.4415
		qTND3-1	3H	0	3_555092874	688729854	3HL_3879907	686561576	4.86	8.19	0.17	0-0.962
		qTND5-2	5H	22	GBM1176	9866452	5_13217441	13275486	5.97	11.5	-0.2	21.0335-26.832
UIL	2021	qUIL2-1	2H	138	1H_83810983	670466306	2_540559791	670618797	3.72	4.55	0.95	137.7275-138.181
		qUIL3-1	3H	34	3_511749149	633068871	3_504106156	626219541	13.85	20.99	2.02	32.7168-35.9128
		qUIL6-1	6H	77	6HL_26706644	517073082	GBM1256	510422775	7.38	10.25	1.31	76.614-78.125
		qUIL7-1	7H	25	7HL_2460896	631357047	7HL_27281835	625919625	4.27	5.36	0.96	21.4588-25.3288
		qUIL7-2	7H	165	7_171033057	166688679	7_194302352	166151441	6.52	8.73	1.23	164.6288-165.0324
	2022	qUIL3-1	3H	33	3_511749149	633068871	3_504106156	626219541	12.9	30.37	2.76	32.7168-35.9128
SIL	2021	qSIL3-1	3H	33	3_511749149	633068871	3_504106156	626219541	18.66	16.47	1.31	32.7168-35.9128
		qSIL4-2	4H	71	M_300241_491	493755382	2_508501818	604443908	3.46	2.3	-0.46	70.465-71.2305
		qSIL7-1	7H	16	7HL_30780105	634542684	M_5654_1031	636383104	3.68	2.37	0.48	14.93-16.0028
		qSIL7-3	7H	152	2_287569753	265478343	7HL_29535430	345204135	32.68	39.05	1.85	151.9228-152.2412
	2022	qSIL3-1	3H	33	3_511749149	633068871	3_504106156	626219541	30.45	38.97	2.1	32.7168-35.9128
		qSIL4-1	4H	18	GBM1220	621487970	4_521965050	621442233	3.12	2.23	0.46	17.8595-18.3285
		qSIL7-2	7H	65	7HL_8312277	563855932	7HL_13143105	562785370	6.38	4.81	0.67	64.9492-65.1768
TIL	2021	qTIL3-1	3H	33	3_504148850	632547821	3_511749149	633068871	22.4	32.94	1.35	32.6372-32.7168
		qTIL7-1	7H	134	7HS_17906516	297271174	M_101938_837	382248750	21.39	30.69	1.19	133.186-134.4116
	2022	qTIL3-1	3H	33	3_511749149	633068871	3_504106156	626219541	15.71	31.75	1.72	32.7168-35.9128
		qTIL7-2	7H	137	7HS_29196961	337033067	M_126443_1107	358830340	12.96	24.32	1.37	136.2132-137.2828
UID	2021	qUID2-1	2H	132	2_531230596	662451044	2HL_43143355	668047109	5.58	9.86	0.11	131.463-132.495
		qUID2-2	2H	188	2_598741132	727551618	2_600701693	728016396	3.83	6.4	0.09	187.572-188.303
		qUID3-1	3H	79	3HL_21306461	532662956	3HL_21303890	N/A	6.98	12.67	-0.12	78.6892-79.186
		qUID4-1	4H	28	4HL_39593094	614166557	4HL_45045821	614726458	6.51	11.4	-0.11	27.962-28.9585
		qUID4-4	4H	158	4HS_21913031	8311409	4_8019773	7858837	4.2	7.01	0.09	157.5925-158.063
	2022	qUID3-1	3H	79	3HL_21306461	532662956	3HL_21303890	NA	6.85	15.73	-0.16	78.6892-79.186
		qUID4-2	4H	29	4HL_45045821	614726458	4HL_6409134	599964924	6.08	13.74	-0.15	28.9585-35.5015
		qUID4-3	4H	151	4HS_28564347	16168641	M_2553137_482	14606515	4.68	10.44	0.13	148.359-151.3395
		qUID7-1	7H	201	7HS_2758449	43886441	7_46081414	40914795	3.32	7.12	-0.11	200.4504-201.1872
SID	2021	qSID2-1	2H	38	7HL_9860070	182797137	2_152855299	185873216	7.06	9.63	-0.15	37.641-38.076
		qSID2-2	2H	71	2HL_18957514	508794985	2HL_20952058	520985368	14.82	24.12	0.24	69.659-70.6015
		qSID2-5	2H	132	2_531230596	662451044	2HL_43143355	668047109	10.09	15.19	0.2	131.463-132.495
		qSID3-1	3H	79	3HL_21306461	532662956	3HL_21303890	N/A	5.4	7.19	-0.13	78.6892-79.186
		qSID4-1	4H	28	4HL_39593094	614166557	4HL_45045821	614726458	4.56	5.91	-0.12	27.962-28.9585
		qSID4-2	4H	148	4_16553551	15498285	4HS_28564347	16168641	10.52	15.56	0.19	147.7155-148.359
		qSID5-1	5H	4	5_54803	433302	5_3871196	4150809	5.75	7.73	-0.13	0.842-4.492
	2022	qSID2-3	2H	94	2HL_2741060	541630495	M_230635_804	N/A	3.05	5.07	0.13	93.711-94.4105
		qSID2-4	2H	129	2HL_34260490	651470354	2_524782265	651533453	5.73	9.6	0.19	128.677-129.6285
		qSID3-2	3H	206	3HS_1093997	37177869	3_28890185	34958927	5.84	10.08	-0.17	205.7444-207.0068
		qSID4-1	4H	28	4HL_39593094	614166557	4HL_45045821	614726458	3.7	5.98	-0.14	27.962-28.9585
		qSID4-2	4H	148	4_16553551	15498285	4HS_28564347	16168641	10.54	19.65	0.25	147.7155-148.359
		qSID5-1	5H	4	5_54803	433302	5_3871196	4150809	3.05	4.87	-0.12	0.842-4.492
TID	2021	qTID2-2	2H	95	M_230635_804	N/A	M_54203_5996	548616942	12.91	19.49	0.23	94.4105-95.121
		qTID2-4	2H	132	2_531230596	662451044	2HL_43143355	668047109	7.93	11.21	0.18	131.463-132.495
		qTID3-1	3H	52	3HL_33151823	599149306	3HL_45910009	602916011	4.42	5.58	-0.12	51.7392-52.0672
		qTID4-1	4H	148	4_16553551	15498285	4HS_28564347	16168641	10.41	14.99	0.2	147.7155-148.359
		qTID5-1	5H	4	5_54803	433302	5_3871196	4150809	5.05	6.52	-0.13	0.842-4.492
	2022	qTID2-1	2H	75	2HL_25534662	473353900	M_207663_343	469357816	4.59	6.19	0.13	74.74-75.3875
		qTID2-3	2H	123	2_514353957	645373132	2HL_13648618	645218857	12.5	19.21	0.25	122.9775-123.4415
		qTID3-1	3H	52	3HL_33151823	599149306	3HL_45910009	602916011	8.82	12.76	-0.19	51.7392-52.0672
		qTID4-2	4H	164	M_282112_578	4471498	4_3860802	410455	4.28	5.72	0.13	162.7925-164.1715
		qTID5-1	5H	4	5_54803	433302	5_3871196	4150809	8.82	12.82	-0.19	0.842-4.492
		qTID7-1	7H	12	7_584878350	639840575	7_583744292	638533031	12.35	18.86	-0.24	11.9864-14.2052
		qTID7-2	7H	15	7HL_30780105	634236173	M_5654_1031	636383104	21.23	39.14	0.35	14.93-16.0028
LI	2021	qLI2-1	2H	140	2HL_23978934	679312461	2HL_37245721	679152930	31.57	80.92	-2.32	139.5755-140.321
		qLI2-2	2H	144	2_561951308	685486087	2HL_44347520	684726339	21.76	44.66	1.71	143.8815-144.5755
		qLI3-1	3H	33	3_511749149	633068871	3_504106156	626219541	9.5	15.46	1.04	32.7168-35.9128
		qLI7-1	7H	45	M_205503_1634	604404435	7_540653807	598974990	3.67	5.25	0.55	44.67-45.102
		qLI7-2	7H	134	7HS_17906516	297271174	M_101938_837	382248750	12.98	22.69	1.16	133.186-134.4116
	2022	qLI3-1	3H	33	3_511749149	633068871	3_504106156	626219541	14.39	23.97	1.1	32.7168-35.9128
		qLI7-2	7H	134	7HS_17906516	297271174	M_101938_837	382248750	18.06	32.56	1.19	133.186-134.4116
SW	2021	qSW2-1	2H	79	M_223185_603	473725143	M_167678_1523	460965640	3.78	6.54	0.35	78.981-79.797
		qSW3-1	3H	79	3HL_21306461	532662956	3HL_21303890	NA	7.46	14.15	-0.51	78.6892-79.186
		qSW4-1	4H	163	M_282112_578	4471498	4_3860802	410455	3.07	5.41	0.31	162.7925-164.1715
		qSW7-2	7H	162	7HS_33151126	214882817	M_262022_735	167591333	9.6	19.27	0.6	160.9692-163.922
	2022	qSW2-1	2H	79	M_223185_603	473725143	M_167678_1523	460965640	5.77	10.33	0.42	78.981-79.797
		qSW7-1	7H	160	7_227758562	207365828	7_276875544	211932690	6.34	11.4	0.44	159.8832-160.0064
TIBF	2021	qTIBF2-1	2H	137	M_165611_94	671629490	2_535589467	670567438	10.49	24.93	1.54	136.7935-137.424
		qTIBF3-1	3H	52	3HL_33151823	599149306	3HL_45910009	602916011	4.89	10.39	-0.91	51.7392-52.0672
		qTIBF5-1	5H	20	5_6313908	6809742	GBM1176	9866452	4.68	10.31	-0.91	11.274-21.0335
		qTIBF6-1	6H	128	6HL_1993657	354336603	6_307582762	375847495	3.45	7.33	0.78	127.579-128.0695
	2022	qTIBF2-2	2H	162	2HL_18227895	695959829	2_579576154	696239898	5.71	14.65	0.82	161.9905-162.4365
		qTIBF3-1	3H	52	3HL_33151823	599149306	3HL_45910009	602916011	3.82	9.5	-0.66	51.7392-52.0672
		qTIBF5-1	5H	17	5_6313908	6809742	GBM1176	9866452	5.19	15.48	-0.84	11.274-21.0335
		qTIBF6-2	6H	159	6_49398767	46948422	6_51238374	46620043	3.28	8.11	0.63	158.6535-159.5605
MSL	2021	qMSL2-1	2H	51	2HL_30717778	398803444	M_128359_1045	21463762	3.8	2.96	1.5	50.5575-51.113
		qMSL3-1	3H	34	3_511749149	633068871	3_504106156	626219541	17.02	17.52	3.89	32.7168-35.9128
		qMSL6-2	6H	77	6HL_26706644	517073082	GBM1256	510422775	5.31	4.56	1.81	76.614-78.125
		qMSL7-1	7H	32	7_564913828	622266514	7_565612902	620485060	4.72	3.73	1.66	30.8216-32.3616
		qMSL7-2	7H	107	7_266425095	310830238	1H_82374297	312687869	22.9	26.58	4.43	106.6924-107.522
	2022	qMSL3-1	3H	33	3_511749149	633068871	3_504106156	626219541	26.02	39.84	6.78	32.7168-35.9128
		qMSL6-1	6H	75	6_472829987	N/A	M_227287_599	516087894	10.59	11.7	3.38	74.821-75.2115
		qMSL6-3	6H	95	6HL_32472005	446098066	M_200155_412	434685745	5.44	5.27	-2.26	94.861-95.8355
		qMSL7-3	7H	151	7HL_6335336	345673515	Bmac31	225251061	16.49	20.09	4.48	150.108-151.092
a uppermost node diameter (UND), second node diameter (SND), third node diameter (TND), uppermost internode diameter (UID) internode length (TIL), The same as below.
b Chromosome. The same as below.
c The phenotypic variation explained (in %) by each QTL. The same as below.
d Additive effect; +, positive allele coming from Huadamai 6; −, positive allele coming from Huaai 11. The same as below.
e 1.5-LOD confidence interval. The same as below.

## Sheet: Table S2
Table S2. List of putative pleiotropy or linkage of QTLs detected in different traits by single-environment QTL analysis.
No.	Chr.	Genetic Position (cM)	Physic Position (Mb)	Involved traits	LOD	PVE	Add
1	2H	79	460.97-473.73	TID, TND, SW	3.78-9.82	6.54-17.84	+
2	2H	94	541.63-548.62	UND, SID, TID	3.46-12.91	4.83-19.49	+
3	2H	123	635.66-645.37	UND, SND, TND, TID	7.34-12.5	16.11-21.05	+
4	2H	132\138	662.45-671.63	UND, UID, SID, TID, UIL, TIBF	3.72-10.49	4.55-24.93	+
5	3H	3	686.56-695.72	SND, TND	3.01-4.86	5.1-8.19	+
6	3H	33	626.22-633.07	UIL, SIL, TIL, MSL, LI	9.5-30.45	15.46-39.84	+
7	3H	52	599.15-602.92	TID, TIBF	3.82-8.82	5.58-12.76	-
8	3H	79	530.99-532.66	SND, TND, UID, SID, SW	3.87-7.46	7.19-15.73	-
9	3H	205	37.18-37.47	UND, SID	4.32-5.84	5.95-10.08	-
10	4H	28	599.96-614.73	UND, UID, SID	3.7-6.51	5.38-13.74	-
11	4H	148	14.61-16.17	UND, UID, SID, TID	4.68-10.54	8.42-19.65	+
12	4H	163	0.41-8.31	UID, TID, SW	3.07-4.28	5.42-7.01	+
13	5H	4\22	0.43-13.28	UND, SND, TND, SID, TID, TIBF	3.05-8.82	4.87-15.48	-
14	6H	77	510.42-517.96	UIL, MSL	5.31-10.59	4.56-11.7	+
15	7H	15	634.24-639.84	TID, SIL	3.68-21.23	2.37-39.14	+/-
16	7H	134\151	225.25-388.47	SIL, TIL, LI, MSL	12.96-32.68	22.09-39.05	+
17	7H	162	166.04-214.88	UIL, SW	6.34-9.6	8.73-19.27	+

## Sheet: Table S3
Table S3. QTLs for barley stem related traits identified in the DH populations using covariate QTL analysis.
Trait	Year	Covariate QTL	Chr	Position (cM)	Left_Marker	Physic Position (bp)	Right_Marker	Physic Position (bp)	Additive Effect	LOD	Var_Genet_(i)	r2 (%)	Var_Error	Var_Phen (total)
UND	2021	qcUND4-1	4H	28.9585	4HL_45045821	614726458	4HL_45045821	614726545	-0.1286	4.6947	0.0166	9.104	0.0801	0.1818
		qcUND4-2	4H	147.19	4HS_38761945	NA	4_16553551	15498285	0.1382	4.8085	0.0191	10.5087
		qcUND7-2	7H	185.099	7HS_15526962	83244555	7HS_15526962	83244642	0.2021	8.0159	0.0408	22.47
		qcUND7-3	7H	208.78	7_31360519	29950008	7_31360519	29950078	-0.1314	3.6689	0.0173	9.4937
	2022	qcUND3-1	3H	205.744	3HS_1093997	37177869	3HS_1093997	37177956	-0.153	4.5894	0.0234	12.012	0.1152	0.1949
		qcUND7-1	7H	184.076	7HS_30257307	83769435	7HS_30257307	83769522	0.1494	4.363	0.0223	11.444
SND	2021	qcSND3-2	3H	78.6892	3HL_21306461	532662956	3HL_21306461	532663043	-0.1135	3.3481	0.0129	5.3987	0.123	0.2384
		qcSND3-4	3H	222.028	3_9347910	12775037	3_9347910	12775124	-0.1334	3.1363	0.0178	7.4616
		qcSND4-1	4H	147.19	4HS_38761945	NA	4_16553551	15498285	0.1581	3.9659	0.025	10.4861
		qcSND7-2	7H	160.401	7HS_29625706	211355200	7HS_29625706	211355287	0.1446	4.1062	0.0209	8.7736
	2022	qcSND3-1	3H	3.2	GBM1238	687765899	GBM1238	687765918	0.1229	3.18	0.0151	6.6299
		qcSND3-3	3H	205.744	3HS_1093997	37177869	3HS_1093997	37177869	-0.1778	4.7811	0.0316	13.8743	0.1616	0.2277
		qcSND7-1	7H	122.122	7HS_21726812	322961719	7HS_21726812	322961806	0.1396	4.1575	0.0195	8.5586
TND	2021	qcTND1-1	1H	7.8905	1H_62212500	4790825	1H_62212500	4790912	-0.1089	3.0165	0.0119	3.1532
		qcTND2-1	2H	78.981	M_223185_603	473725143	M_223185_603	473725230	0.1887	5.4058	0.0356	9.4723	0.2511	0.3758
		qcTND3-2	3H	78.6892	3HL_21306461	532662956	3HL_21306461	532663043	-0.1647	4.7241	0.0271	7.2133
		qcTND5-2	5H	155.346	M_81421_1318	379911729	M_81421_1318	379682534	-0.1593	3.8012	0.0254	6.7478
		qcTND7-1	7H	160.401	7HS_29625706	211355200	7HS_29625706	211355287	0.1574	3.702	0.0248	6.5909
	2022	qcTND3-1	3H	0.962	3HL_3879907	686561576	3HL_3879907	686561663	0.15	3.7712	0.0225	6.8583	0.1756	0.3281
		qcTND3-3	3H	81.0784	3_426808044	526266939	3_426808044	526267026	-0.2109	3.2583	0.0445	13.5572
		qcTND5-1	5H	15.1778	5_6313908	6809742	GBM1176	9866452	-0.2023	3.9414	0.0409	12.4689
UIL	2021	qcUIL3-1	3H	34.3148	3_511749149	633068871	3_504106156	626219541	2.1307	13.992	4.5399	27.3185	5.2892	16.6184
		qcUIL3-3	3H	85.5365	3HL_25561608	704382613	3HL_25561608	704382696	-1.0781	4.8068	1.1622	6.9935
		qcUIL6-1	6H	84.705	2HS_26945700	91148733	2HS_26945700	91148817	0.9835	3.6422	0.9672	5.8202
		qcUIL7-1	7H	45.102	7_540653807	598974990	7_540653807	598975077	0.8942	3.0106	0.7996	4.8113
		qcUIL7-3	7H	186.232	7_74542989	71957427	7_74542989	71957514	1.1842	6.1049	1.4024	8.4387
	2022	qcUIL3-2	3H	33.5158	3_511749149	633068871	3_504106156	626219541	2.7242	11.7427	7.421	35.8741	9.9355	20.6864
		qcUIL6-1	6H	84.705	2HS_26945700	91148733	2HS_26945700	91148817	1.1711	3.3544	1.3714	6.6294
		qcUIL7-2	7H	126.487	7HS_26227899	264809662	7HS_26227899	264809749	1.37	4.4831	1.8769	9.073
SIL	2021	qcSIL3-1	3H	33.5158	3_511749149	633068871	3_504106156	626219541	1.5726	20.1082	2.4729	28.7123	1.8707	8.6128
		qcSIL3-2	3H	79.186	3HL_21303890	532662956	3HL_21303890	530992848	-0.6227	4.7092	0.3878	4.5021
		qcSIL7-1	7H	136.748	7HS_29196961	337033067	M_126443_1107	358830340	1.9372	10.066	3.7528	43.5722
	2022	qcSIL1-1	1H	107.015	1_88134541	58537149	1_88134541	58537236	0.4886	3.4677	0.2387	1.3787	9.3605	17.3132
		qcSIL3-1	3H	33.5158	3_511749149	633068871	3_504106156	626219541	2.1597	26.9146	4.6641	26.9398
		qcSIL3-3	3H	108.693	3HL_18997117	305185595	3HL_18997117	305185682	-0.5155	3.197	0.2657	1.5349
		qcSIL6-1	6H	77.3695	6HL_26706644	517073082	GBM1256	510422775	0.4971	3.2455	0.2471	1.4274
		qcSIL7-2	7H	137.283	M_126443_1107	358830340	M_126443_1107	358830427	1.5928	20.9962	2.537	14.6537
TIL	2021	qcTIL2-1	2H	77.4615	2HL_18855931	469006939	2HL_18855931	469007026	0.4501	3.2896	0.2026	4.4708	1.2583	4.5319
		qcTIL3-1	3H	32.7168	3_511749149	633068871	3_511749149	633068955	1.2569	21.1362	1.5797	34.8579
		qcTIL7-2	7H	151.923	2_287569753	265478343	2_287569753	265478430	1.2023	20.5271	1.4455	31.8956
	2022	qcTIL3-1	3H	33.5158	3_511749149	633068871	3_504106156	626219541	1.6995	15.3705	2.8883	37.0989	3.0271	7.7853
		qcTIL7-1	7H	107.522	1H_82374297	312687869	1H_82374297	312687941	1.3675	12.2595	1.8699	24.0189
UID	2021	qcUID2-1	2H	188.303	2_600701693	728016396	2_600701693	728016483	0.1055	4.318	0.0111	8.3754	0.0756	0.1329
		qcUID3-1	3H	78.6892	3HL_21306461	532662956	3HL_21306461	532663043	-0.097	4.7686	0.0094	7.077
		qcUID3-3	3H	222.028	3_9347910	12775037	3_9347910	12859315	-0.0906	3.2208	0.0082	6.1813
		qcUID4-1	4H	29.8932	4HL_45045821	614726458	4HL_6409134	599964924	-0.1109	4.3056	0.0123	9.2528
		qcUID4-2	4H	145.473	4HS_32009949	22489623	4HS_32009949	22489710	0.1044	4.0304	0.0109	8.1963
		qcUID2-6	5H	6.6878	5_3910746	3923973	5_6509036	5058282	-0.0732	3.0805	0.0054	4.0345
	2022	qcUID3-2	3H	217.28	3_18321105	23918242	3_12801553	17964751	-0.1234	3.1688	0.0152	9.1733	0.109	0.1661
		qcUID4-1	4H	29.8932	4HL_45045821	614726458	4HL_6409134	599964924	-0.1328	3.3398	0.0176	10.6085
		qcUID4-3	4H	151.339	M_2553137_482	14606515	M_2553137_482	14606599	0.1559	4.7362	0.0243	14.6311
SID	2021	qcSID3-1	3H	78.6892	3HL_21306461	532662956	3HL_21306461	532663043	-0.1352	4.9746	0.0183	7.2923	0.1442	0.2507
		qcSID4-1	4H	30.8279	4HL_45045821	614726458	4HL_6409134	599964924	-0.1479	3.6561	0.0219	8.7202
		qcSID4-3	4H	149.352	4HS_28564347	16168641	M_2553137_482	14606515	0.2148	10.2838	0.0461	18.4055
		qcSID5-2	5H	6.6878	5_3910746	3923973	5_6509036	5058282	-0.1422	3.6265	0.0202	8.0647
	2022	qcSID3-2	3H	205.744	3HS_1093997	37177869	3HS_1093997	37177956	-0.1953	6.1083	0.0382	12.657	0.1404	0.3014
		qcSID4-2	4H	147.715	4_16553551	15498285	4_16553551	15498372	0.203	6.3672	0.0412	13.6714
		qcSID5-1	5H	1.7545	5_54803	433302	5_3871196	4150809	-0.1413	3.1933	0.02	6.6193
		qcSID5-3	5H	89.253	5HL_23411605	225283282	5HL_23411605	225283369	-0.1465	3.0993	0.0215	7.121
TID	2021	qcTID2-2	2H	95.121	M_54203_5996	548616942	M_54203_5996	548617029	0.2004	7.522	0.0402	15.6358	0.0864	0.257
		qcTID3-1	3H	32.7168	3_511749149	633068871	3_511749149	633068955	-0.1496	5.0522	0.0224	8.7121
		qcTID3-2	3H	78.6892	3HL_21306461	532662956	3HL_21306461	532663043	-0.1233	4.0585	0.0152	5.9171
		qcTID4-1	4H	150.346	4HS_28564347	16168641	M_2553137_482	14606515	0.1524	5.7226	0.0232	9.037
		qcTID5-1	5H	3.5795	5_54803	433302	5_3871196	4150809	-0.1158	3.5025	0.0134	5.2177
		qcTID5-2	5H	155.346	M_81421_1318	379911729	M_81421_1318	379682534	-0.1196	3.5827	0.0143	5.5705
	2022	qcTID2-1	2H	78.2212	2HL_18855931	469006939	M_223185_603	473725143	0.1932	6.1687	0.0373	13.7364	0.1102	0.2717
		qcTID3-3	3H	205.744	3HS_1093997	37177869	3HS_1093997	37177956	-0.1562	5.3894	0.0244	8.9843
		qcTID4-1	4H	150.346	4HS_28564347	16168641	M_2553137_482	14606515	0.1863	6.2914	0.0347	12.7714
		qcTID5-1	5H	1.7545	5_54803	433302	5_3871196	4150809	-0.1557	5.8237	0.0242	8.9214
LI	2021	qcLI3-1	3H	33.5158	3_511749149	633068871	3_504106156	626219541	1.2724	9.2813	1.619	21.6717	4.2065	7.4705
		qcLI7-1	7H	71.8888	7HL_15512843	537880773	7HL_15512843	537880860	1.2826	12.6253	1.645	22.0205
	2022	qcLI3-1	3H	33.5158	3_511749149	633068871	3_504106156	626219541	1.1196	14.4118	1.2534	29.9612	1.4505	4.1835
		qcLI7-2	7H	151.923	2_287569753	265478343	2_287569753	265478430	1.2164	17.4518	1.4796	35.3676
SW	2021	qcSW2-1	2H	78.981	M_223185_603	473725143	M_223185_603	473725230	0.3828	3.2431	0.1465	5.5781	1.7232	2.6266
		qcSW3-1	3H	78.6892	3HL_21306461	532662956	3HL_21306461	532663043	-0.503	6.6561	0.253	9.631
		qcSW5-2	5H	164.838	5HL_49625566	449643051	5HL_49625566	449643138	-0.3064	3.3317	0.0939	3.5733
		qcSW7-1	7H	160.401	7HS_29625706	211355200	7HS_29625706	211355287	0.6404	9.8433	0.4101	15.6131
	2022	qcSW2-1	2H	78.981	M_223185_603	473725230	M_223185_603	473725230	0.5615	7.8135	0.3153	11.6731	1.6217	2.7011
		qcSW2-2	2H	158.792	1H_58333588	695789858	1H_58333588	695789945	0.3872	4.44	0.1499	5.5506
		qcSW3-2	3H	100.554	3HL_43341146	422744906	3HL_43341146	422744993	-0.4077	3.6414	0.1662	6.1526
		qcSW4-1	4H	44.2925	4HL_7284337	582490494	4HL_7284337	582490581	-0.292	3.2457	0.0853	3.1564
		qcSW4-2	4H	147.715	4_16553551	15498285	4_16553551	15498372	0.2832	4.8398	0.0802	2.9686
		qcSW5-1	5H	0.842	5_54803	433302	5_54803	433389	-0.2535	3.6168	0.0642	2.3784
		qcSW7-2	7H	179.63	7HS_24633706	109650557	7HS_24633706	109650644	0.4672	7.6768	0.2183	8.0807
MSL	2021	qcMSL3-1	3H	34.3148	3_511749149	633068871	3_504106156	626219541	4.4154	14.4218	19.4957	27.1669	19.8892	71.7626
		qcMSL3-2	3H	94.356	3HL_19606269	463305191	3HL_19606269	463305278	-2.0103	4.8382	4.0413	5.6314
		qcMSL7-2	7H	126.487	7HS_26227899	264809662	7HS_26227899	264809749	4.9111	20.5274	24.1188	33.6091
	2022	qcMSL3-1	3H	32.7168	3_511749149	633068871	3_511749149	633068955	6.2993	23.0249	39.6807	41.002	21.4919	96.7777
		qcMSL6-1	6H	77.3695	6HL_26706644	517073082	GBM1256	510422775	2.0035	3.7631	4.0139	4.1476
		qcMSL7-1	7H	21.4588	7HL_2460896	631357047	7HL_2460896	631357134	1.9981	3.6239	3.9923	4.1252
		qcMSL7-2	7H	126.487	7HS_26227899	264809662	7HS_26227899	264809749	4.5172	16.4829	20.4048	21.0842

## Sheet: Table S4
Table S4. Stable QTLs identified for stem related traits in two years using multi-environment trait (MET) analysis.
Trait	MET QTL	Chr.	Genetic Position (cM)	Left Marker	Physic Position (bp)	Right Marker	Physic Position (bp)	LOD	LODA a	LODAE b	PVE	PVEA c	PVEAE d	Add	AE_1 e	AE_2	h2 f	CI	Year g
UND	qmUND2-1	2H	94	2HL_2741060	541630495	M_230635_804	N/A	3.92	3.07	0.85	2.61	2.24	0.37	0.07	0.03	-0.03	85.82	93.711-94.4105	2021
	qmUND2-2	2H	123	2_514353957	645373132	2HL_13648618	645218857	8.7	6.15	2.55	8.7	4.74	3.96	0.1	-0.1	0.1	54.48	122.9775-123.4415	2022
	qmUND2-3	2H	136	M_149956_1482	663437677	M_165611_94	671629490	6.92	3.25	3.67	4.71	2.47	2.24	0.07	0.07	-0.07	52.44	133.6065-136.7935	2021
	qmUND3-4	3H	206	3HS_1093997	37177869	3_28890185	34958927	5.08	4.16	0.92	3.44	3.06	0.37	-0.08	-0.03	0.03	89.21	205.7444-207.0068	2021
	qmUND4-1	4H	29	4HL_45045821	614726458	4HL_6409134	599964924	5	4.3	0.7	3.41	3.17	0.25	-0.08	-0.02	0.02	92.69	28.9585-35.5015	2021
	qmUND4-2	4H	148	4_16553551	15498285	4HS_28564347	16168641	6.43	4.5	1.93	4.37	3.33	1.04	0.08	0.04	-0.04	76.2	147.7155-148.359	2021
	qmUND5-1	5H	23	GBM1176	9866452	5_13217441	13275486	3.6	3.37	0.23	2.91	2.46	0.44	-0.07	0.03	-0.03	84.83	21.0335-26.832
	qmUND7-1	7H	184	7HS_21827941	81887807	7HS_30257307	83769435	16.96	14.86	2.11	13.59	12.48	1.11	0.15	0.05	-0.05	91.83	183.7472-184.0756	2021, 2022
	qmUND7-2	7H	209	7_31360519	29950008	7_28180957	29411897	5.65	4.8	0.86	3.92	3.61	0.31	-0.08	-0.02	0.02	92.09	208.7796-209.4312	2021
SND	qmSND2-1	2H	123	2_514353957	645373132	2HL_13648618	645218857	17.52	17.06	0.46	17.4	17.39	0.01	0.22	0	0	99.94	122.9775-123.4415	2021, 2022
	qmSND3-1	3H	4	3_558269837	695723892	GBM1238	688794940	3.69	3.1	0.59	2.97	2.69	0.28	0.08	-0.03	0.03	90.57	2.1552-3.2	2022
	qmSND3-2	3H	79	3HL_21306461	532662956	3HL_21303890	N/A	3.95	2.96	0.99	4.02	2.51	1.5	-0.08	-0.06	0.06	62.59	78.6892-79.186	2021
	qmSND4-1	4H	147	4HS_38761945	N/A	4_16553551	15498285	4.17	4.16	0.01	3.87	3.69	0.19	0.09	0.02	-0.02	95.1	146.665-147.7155
	qmSND5-1	5H	26	GBM1176	9866452	5_13217441	13275486	4.74	3.85	0.88	3.79	3.37	0.43	-0.09	0.03	-0.03	88.68	21.0335-26.832	2022
TND	qmTND2-1	2H	79	M_223185_603	473725143	M_167678_1523	460965640	10.1	6.97	3.13	8.5	5.62	2.88	0.14	0.1	-0.1	66.12	78.981-79.797	2021
	qmTND2-2	2H	123	2_514353957	645373132	2HL_13648618	645218857	11.84	10.18	1.66	11.8	8.45	3.35	0.18	-0.11	0.11	71.61	122.9775-123.4415	2022
	qmTND3-1	3H	0	3_555092874	688729854	3HL_3879907	686561576	4.86	2.82	2.03	4.38	2.2	2.17	0.08	-0.08	0.08	50.34	0-0.962	2022
	qmTND3-2	3H	79	3HL_21306461	532662956	3HL_21303890	N/A	4.56	2.83	1.73	3.45	2.19	1.26	-0.08	-0.06	0.06	63.48	78.6892-79.186	2021
	qmTND5-1	5H	0	5HS_7374618	2568671	5_54803	433302	4.23	3.13	1.1	3.2	2.43	0.76	-0.09	-0.05	0.05	76.18	0-0.842	2021, 2022
	qmTND5-2	5H	26	GBM1176	9866452	5_13217441	13275486	5.89	3.11	2.78	4.94	2.22	2.72	-0.08	0.09	-0.09	44.94	21.0335-26.832	2021, 2022
	qmTND5-3	5H	152	5HL_10821972	379450745	5HL_36003694	428146161	3.67	2.28	1.39	2.77	1.8	0.97	-0.08	-0.06	0.06	64.98	152.6225-153.6865	2021
	qmTND7-1	7H	32	7_564913828	622266514	7_565612902	620485060	3.2	3.2	0	2.4	2.39	0.01	0.09	-0.01	0.01	99.58	30.8216-32.3616
UIL	qmUIL1-1	1H	116	1_58149966	36735263	M_192224_1318	33593685	3.92	3.29	0.64	2.53	2.49	0.04	0.68	0.09	-0.09	98.42	115.6835-116.3615
	qmUIL2-1	2H	137	1H_83810983	670466306	2_540559791	670618797	3.88	2.18	1.71	2.19	1.67	0.52	0.61	0.34	-0.34	76.26	137.7275-138.181	2021
	qmUIL3-1	3H	35	3_511749149	633068871	3_504106156	626219541	26.13	24.17	1.96	25.05	24.52	0.53	2.33	-0.34	0.34	97.88	32.7168-35.9128	2021
	qmUIL6-1	6H	76	6HL_26706644	517073082	GBM1256	510422775	7.36	2.61	4.75	4.2	1.95	2.26	0.6	0.65	-0.65	46.32	76.614-78.125	2021
	qmUIL7-1	7H	25	7HL_2460896	631357047	7HL_27281835	625919625	4.96	3.6	1.36	3.03	2.77	0.26	0.73	0.23	-0.23	91.42	21.4588-25.3288	2021
	qmUIL7-3	7H	164	7_171033057	166688679	7_194302352	166151441	6.52	2.46	4.06	3.83	1.89	1.94	0.61	0.62	-0.62	49.35	164.6288-165.0324	2021
SIL	qmSIL3-1	3H	33	3_511749149	633068871	3_504106156	626219541	49.09	46.88	2.21	27.81	26.42	1.39	1.7	-0.39	0.39	95	32.7168-35.9128	2021, 2022
	qmSIL4-1	4H	18	GBM1220	621487970	4_521965050	621442233	4.41	4.32	0.09	1.52	1.41	0.11	0.36	-0.1	0.1	92.76	17.8595-18.3285	2022
	qmSIL4-2	4H	70	M_300241_491	493755382	2_508501818	604443908	3.75	2.82	0.93	1.19	0.94	0.25	-0.3	-0.15	0.15	78.99	70.465-71.2305	2021, 2022
	qmSIL6-1	6H	64	M_1595340_1528	520663864	6HL_39566717	524142740	3.33	3.31	0.02	1.02	1.02	0	0.31	0	0	100	63.8485-64.3925
	qmSIL6-2	6H	77	6HL_26706644	517073082	GBM1256	510422775	3.35	3.34	0.01	1.04	1.02	0.02	0.3	-0.05	0.05	98.08	76.614-78.125
	qmSIL7-1	7H	16	7HL_30780105	634542684	M_5654_1031	636383104	3.85	2.65	1.2	1.2	0.86	0.34	0.29	0.18	-0.18	71.67	14.93-16.0028	2021
	qmSIL7-2	7H	65	7HL_8312277	563855932	7HL_13143105	562785370	6.99	5.98	1.01	2.67	1.99	0.68	0.42	-0.25	0.25	74.53	64.9492-65.1768	2022
	qmSIL7-4	7H	152	2_287569753	265564230	7HL_29535430	345204135	32.68	23.37	9.31	18.76	9.46	9.3	0.93	0.92	-0.92	50.43	151.9228-152.2412	2021
TIL	qmTIL3-1	3H	33	3_511749149	633068871	3_504106156	626219541	38.11	31.61	6.5	32.13	31.66	0.47	1.53	-0.19	0.19	98.54	32.7168-35.9128	2021, 2022
	qmTIL7-1	7H	134	7HS_17906516	297271174	M_101938_837	382248750	21.39	8.62	12.77	11.31	6.01	5.3	0.61	0.57	-0.57	53.14	133.186-134.4116	2021, 2022
	qmTIL7-2	7H	137	7HS_29196961	337033067	M_126443_1107	358830340	13	10.2	2.8	15.26	7.22	8.04	0.67	-0.7	0.7	47.31	136.2132-137.2828	2021, 2022
UID	qmUID2-1	2H	38	7HL_9860070	182797137	2_152855299	185873216	11.5	8.39	3.11	20.73	9.52	11.21	-0.12	0.13	-0.13	45.92	37.641-38.076
	qmUID2-3	2H	132	2_531230596	662451044	2HL_43143355	668047109	5.84	3.15	2.7	4.39	3.48	0.91	0.08	0.04	-0.04	79.27	131.463-132.495	2021
	qmUID2-4	2H	188	2_598741132	727551618	2_600701693	728016396	4.99	3.97	1.02	4.22	4.17	0.05	0.08	0.01	-0.01	98.82	187.572-188.303	2021
	qmUID3-1	3H	79	3HL_21306461	532662956	3HL_21303890	N/A	11.59	10.46	1.14	12.63	12.52	0.11	-0.13	0.01	-0.01	99.13	78.6892-79.186	2021, 2022
	qmUID4-1	4H	28	4HL_39593094	614166557	4HL_45045821	614726458	7.06	4.33	2.74	5.43	4.64	0.78	-0.08	-0.03	0.03	85.61	27.962-28.9585	2021, 2022
	qmUID4-2	4H	158	4HS_21913031	8311409	4_8019773	7858837	5.27	4.07	1.21	4.34	4.24	0.11	0.08	0.01	-0.01	97.47	157.5925-158.063	2021, 2022
	qmUID5-1	5H	7	5_3910746	3923973	5_6509036	5058282	3.13	2.3	0.83	2.5	2.41	0.08	-0.06	-0.01	0.01	96.79	5.2285-7.4175
	qmUID7-1	7H	201	7HS_2758449	43886441	7_46081414	40914795	3.3	3.18	0.12	3.32	3.17	0.16	-0.07	0.01	-0.01	95.2	200.4504-201.1872	2022
SID	qmSID2-1	2H	38	7HL_9860070	182797137	2_152855299	185873216	7.31	4.31	3	4.26	3.09	1.17	-0.09	-0.06	0.06	72.54	37.641-38.076	2021
	qmSID2-2	2H	70	2HL_20952058	520985368	2HL_26347197	496314933	14.82	6.51	8.31	9.87	4.68	5.19	0.12	0.12	-0.12	47.42	70.6015-71.437	2021
	qmSID2-3	2H	94	2HL_2741060	541630495	M_230635_804	N/A	3.06	1.86	1.2	2.85	1.31	1.54	0.06	-0.07	0.07	45.96	93.711-94.4105	2022
	qmSID2-4	2H	129	2HL_34260490	651470354	2_524782265	651533453	5.74	4.02	1.72	5.56	2.86	2.7	0.09	-0.09	0.09	51.44	128.677-129.6285
	qmSID2-5	2H	132	2_531230596	662451044	2HL_43143355	668047109	10.09	4.39	5.69	6.24	3.1	3.14	0.1	0.1	-0.1	49.68	131.463-132.495	2021
	qmSID3-1	3H	79	3HL_21306461	532662956	3HL_21303890	N/A	6.04	4.28	1.76	3.48	2.99	0.49	-0.09	-0.04	0.04	85.92	78.6892-79.186	2021
	qmSID3-2	3H	205	3HS_1093997	37177869	3_28890185	34958927	7.29	7.17	0.12	6.44	5.26	1.19	-0.12	0.06	-0.06	81.55	205.7444-207.0068	2022
	qmSID4-1	4H	28	4HL_39593094	614166557	4HL_45045821	614726458	8.26	7.93	0.33	5.95	5.91	0.04	-0.13	0.01	-0.01	99.33	27.962-28.9585	2021, 2022
	qmSID4-2	4H	147	4_16553551	15498285	4HS_28564347	16168641	21.06	20.28	0.78	17.92	17.58	0.34	0.22	-0.03	0.03	98.1	147.7155-148.359	2021, 2022
	qmSID5-1	5H	5	5_54803	433302	5_3871196	4150809	8.79	8.08	0.72	5.97	5.96	0.01	-0.12	0	0	99.83	0.842-4.492	2021
TID	qmTID2-2	2H	75	2HL_25534662	473353900	M_207663_343	469357816	4.59	2.7	1.89	3.09	1.62	1.47	0.07	-0.06	0.06	52.43	74.74-75.3875	2022
	qmTID2-3	2H	95	M_230635_804	N/A	M_54203_5996	548616942	12.91	7.31	5.61	9.38	4.7	4.68	0.12	0.12	-0.12	50.11	94.4105-95.121	2021
	qmTID2-4	2H	123	2_514353957	645373132	2HL_13648618	645218857	12.53	7.22	5.31	9.87	4.59	5.28	0.12	-0.13	0.13	46.5	122.9775-123.4415	2022
	qmTID2-5	2H	132	2_531230596	662451044	2HL_43143355	668047109	7.94	3.99	3.95	5.23	2.38	2.85	0.09	0.09	-0.09	45.51	131.463-132.495	2021
	qmTID3-1	3H	51	3HL_33151823	599149306	3HL_45910009	602916011	13.23	13.09	0.13	8.96	8.59	0.37	-0.15	0.03	-0.03	95.87	51.7392-52.0672	2021, 2022
	qmTID4-2	4H	148	4_16553551	15498285	4HS_28564347	16168641	11.69	10.04	1.65	7.9	6.31	1.59	0.13	0.07	-0.07	79.87	147.7155-148.359	2021
	qmTID4-3	4H	164	M_282112_578	4471498	4_3860802	410455	4.37	3.04	1.33	2.87	1.86	1.02	0.07	-0.05	0.05	64.58	162.7925-164.1715	2022
	qmTID5-1	5H	4	5_54803	433302	5_3871196	4150809	13.86	13.78	0.08	9.44	9.16	0.28	-0.16	0.03	-0.03	97.03	0.842-4.492	2021
	qmTID7-1	7H	12	7_584878350	639840575	7_583744292	638533031	12.69	5.79	6.9	9.88	3.58	6.3	-0.11	0.14	-0.14	36.23	11.9864-14.2052	2022
	qmTID7-2	7H	15	7HL_30780105	634236173	M_5654_1031	636383104	21.82	18.25	3.57	20.41	12.74	7.67	0.2	-0.15	0.15	62.42	14.93-16.0028	2022
LI	qmLI2-1	2H	141	2HL_23978934	679312461	2HL_37245721	679152930	32.56	31.03	1.54	47.47	28.91	18.56	-1.29	-1.03	1.03	60.9	139.5755-140.321	2021
	qmLI2-2	2H	144	2_561951308	685486087	2HL_44347520	684726339	22.25	13.88	8.37	26.12	10.42	15.7	0.77	0.94	-0.94	39.89	143.8815-144.5755	2021
	qmLI3-1	3H	35	3_511749149	633068871	3_504106156	626219541	22.05	21.43	0.62	17.68	17.68	0	1.03	-0.01	0.01	100	32.7168-35.9128	2021, 2022
	qmLI7-1	7H	45	M_205503_1634	604404435	7_540653807	598974990	3.91	3.22	0.69	3.17	2.23	0.94	0.34	0.22	-0.22	70.35	44.67-45.102
	qmLI7-1	7H	134	7HS_17906516	297271174	M_101938_837	382248750	29.7	28.6	1.1	26.23	26.23	0	1.16	0	0	100	133.186-134.4116	2022
SW	qmSW2-1	2H	79	M_223185_603	473725143	M_167678_1523	460965640	9.33	9.21	0.12	8.02	7.98	0.05	0.38	-0.03	0.03	99.38	78.981-79.797	2021, 2022
	qmSW3-1	3H	79	3HL_21306461	532662956	3HL_21303890	N/A	7.47	4.65	2.81	7.15	3.94	3.21	-0.26	-0.24	0.24	55.1	78.6892-79.186	2021
	qmSW3-2	3H	83	3HL_11561307	511221615	3_403275941	512777734	40.91	33.98	6.93	72.97	38.03	34.95	-0.81	0.78	-0.78	52.11	83.5996-83.7808	2022
	qmSW4-1	4H	162	M_282112_578	4471498	4_3860802	410455	4.84	4.8	0.04	4.05	3.91	0.14	0.26	0.05	-0.05	96.54	162.7925-164.1715	2021
	qmSW7-1	7H	163	7HS_33151126	214882817	M_262022_735	167591333	9.61	5.36	4.25	9.61	4.54	5.06	0.29	0.3	-0.3	47.29	160.9692-163.922	2021, 2022
TIBF	qmTIBF2-1	2H	137	M_165611_94	671629490	2_535589467	670567438	11.25	10.1	1.15	16.49	11.35	5.14	0.92	0.62	-0.62	68.83	136.7935-137.424	2021
	qmTIBF2-2	2H	162	2HL_18227895	695959829	2_579576154	696239898	5.89	3.68	2.21	5.45	3.9	1.55	0.5	-0.31	0.31	71.56	161.9905-162.4365	2022
	qmTIBF3-1	3H	52	3HL_33151823	599149306	3HL_45910009	602916011	8.66	8.63	0.03	9.92	9.64	0.28	-0.78	-0.13	0.13	97.18	51.7392-52.0672	2021, 2022
	qmTIBF5-1	5H	18	5_6313908	6809742	GBM1176	9866452	9.94	9.77	0.17	11.86	11.79	0.07	-0.86	-0.07	0.07	99.41	11.274-21.0335	2021, 2022
	qmTIBF6-1	6H	127	6HL_1993657	354154555	6_307582762	375847495	3.49	2.55	0.94	4.53	2.65	1.87	0.42	0.35	-0.35	58.63	127.579-128.0695	2021
	qmTIBF6-2	6H	158	6_49398767	46948422	6_51238374	46620043	3.43	2.21	1.22	3.07	2.33	0.75	0.4	-0.22	0.22	75.65	158.6535-159.5605	2022
MSL	qmMSL1-1	1H	118	1_41342487	33666873	1H_84570760	29734630	7.74	7.68	0.06	2.78	2.7	0.07	1.51	-0.25	0.25	97.47	117.433-119.1895
	qmMSL2-1	2H	51	2HL_30717778	398803444	M_128359_1045	21463762	3.83	2.26	1.57	1.27	0.76	0.51	0.83	0.68	-0.68	59.84	50.5575-51.113	2021
	qmMSL3-1	3H	33	3_511749149	633068871	3_504106156	626219541	44.6	43.67	0.93	23.9	22.83	1.08	4.84	-1.05	1.05	95.48	32.7168-35.9128	2022
	qmMSL6-1	6H	75	6_472829987	N/A	M_227287_599	516087894	11.03	6.36	4.67	4.51	2.16	2.35	1.35	-1.41	1.41	47.89	74.821-75.2115	2021, 2022
	qmMSL6-2	6H	76	6HL_26706644	517073082	GBM1256	510422775	5.37	3.38	1.99	1.83	1.15	0.68	0.98	0.76	-0.76	62.84	76.614-78.125	2021, 2022
	qmMSL6-3	6H	141	6HS_21863145	137518949	4.4932	4.347	0.15	1.56	1.45	0.11	-1.17	0.33	-0.33	0.33	-0.33	139.29	140.8345-141.828
	qmMSL7-1	7H	19	7_579149290	635572991	7HL_24591633	632886698	4.62	3.59	1.03	1.69	1.2	0.49	1.06	-0.68	0.68	71.01	18.1168-19.0676
	qmMSL7-2	7H	32	7_564913828	622266514	7_565612902	620485060	4.9	3.4	1.49	1.65	1.13	0.52	0.99	0.67	-0.67	68.48	30.8216-32.3616	2021
	qmMSL7-3	7H	107	7_266425095	310830238	1H_82374297	312687869	22.89	14.9	8	11.27	5.55	5.73	2.19	2.23	-2.23	49.2	106.6924-107.522	2021
	qmMSL7-4	7H	151	7HL_6335336	345673515	Bmac31	225251061	17.72	13.72	4.01	8.46	5.04	3.43	2.08	-1.72	1.72	59.5	150.108-151.092	2022
a LOD score for additive effect.
b LOD score for additive by environment interaction effects.
c Phenotypic variation explained by the additive effect.
d Phenotypic variation explained by additive by environment interaction effect.
e AE_1 to AE_3 represent additive by environment interaction effect detected in 2016, 2017, and 2018 respectively.
f The narrow sense heritability.
g Year from single-environment QTL analysis.

## Sheet: Table S5
Table S5. List of putative pleiotropy or linkage of QTLs detected in different traits by multi-environment trait (MET) analysis.
No.	Chr.	Genetic Position (cM)	Physic Position (Mb)	Involved traits	LOD	PVE	Add
1	1H	115.68-119.19	29.73-36.74	UIL, SIL	3.92-7.74	2.53-2.78	+
2	2H	37.64-38.08	182.8-185.87	UID, SID	7.31-11.5	4.26-20.73	-
3	2H	78.98-79.8	460.97-473.73	TND, SW	9.33-10.1	8.02-8.5	+
4	2H	93.71-95.12	541.63-548.62	UND, SID, TID	3.06-12.91	2.61-9.38	+
5	2H	122.98-123.44	645.22-645.37	UND, SND, TND, TID	8.7-17.52	8.7-17.4	+
6	2H	131.46-137.42	662.45-671.63	UND, UID, SID, TID, UIL,TIBF	3.88-11.25	2.19-16.49	+
7	3H	0-3.2	686.56-695.72	SND, TND	3.69-4.86	2.97-4.38	+
8	3H	32.72-35.91	626.22-633.07	UIL, SIL, TIL, MSL, LI	22.05-49.09	17.68-32.13	+
9	3H	51.74-52.07	599.15-602.92	TID, TIBF	8.66-13.23	8.96-9.92	-
10	3H	78.69-79.19	530.99-532.66	SND, TND, UID, SID, SW	3.95-11.59	3.45-12.63	-
11	3H	205.74-207.01	34.96-37.18	UND, SID	5.08-7.29	3.44-6.44	-
12	4H	29.96-35.5	599.96-614.73	UND, UID, SID	5-8.26	3.41-5.95	-
13	4H	146.67-148.36	15.5-16.17	UND, SND, SID, TID	4.17-21.06	3.87-17.92	+
14	4H	157.59-164.17	0.41-8.31	UID, TID, SW	4.37-5.27	2.87-4.34	+
15	5H	0-7.42	0.43-5.06	TND, UID, SID, TID	3.13-13.86	2.5-9.44	-
16	5H	11.27-26.83	6.81-13.28	UND, SND, TND, TIBF	3.6-9.94	2.91-11.86	-
17	6H	74.82-78.13	510.42-517.07	UIL, SIL, MSL	3.35-11.03	1.04-4.51	+
18	7H	11.99-25.33	625.92-639.84	TID, UIL, SIL, MSL	3.85-21.82	1.2-20.41	+/-
19	7H	30.82-32.36	620.49-622.27	TND, MSL	3.2-4.9	1.65-2.4	+
20	7H	106.69-152.24	225.25-382.25	TIL, MSL, LI	13-32.68	8.46-26.23	+
21	7H	160.97-165.03	166.15-214.88	UIL, SW	6.52-9.61	3.83-9.61	+

## Sheet: Table S6
Table S6. QTLs for barley stem related traits identified in the DH populations by BLUP using single-environment QTL analysis.
Trait a	Main QTL	Chr. b	Genetic Position (cM)	Left Marker	Physic Position (bp)	Right Marker	Physic Position (bp)	LOD	PVE c	Add d	CI e
UND	qbUND2-1	2H	39	2HS_29109012	198804106	2_296072899	232318342	9.4415	12.0551	-0.1234	38.661-39.1045
	qbUND2-2	2H	62	2HS_35831478	313322939	2HL_30880394	413594452	16.7304	24.9128	0.1792	61.7045-63.037
	qbUND2-3	2H	123	2_514353957	645373132	2HL_13648618	645218857	9.8797	12.7111	0.1369	122.9775-123.4415
	qbUND3-1	3H	79	3HL_21306461	532662956	3HL_21303890	N/A	5.0222	6.0235	-0.0857	78.6892-79.186
	qbUND4-1	4H	31	4HL_45045821	614726458	4HL_6409134	599964924	6.1421	8.071	-0.0995	28.9585-35.5015
	qbUND4-2	4H	147	4HS_38761945	N/A	4_16553551	15498285	5.6065	6.8151	0.0915	146.665-147.7155
	qbUND7-1	7H	183	7HS_23607469	NA	7HS_33683527	87379476	10.4233	13.886	0.13	181.34-183.4512
	qbUND7-2	7H	209	7_31360519	29950008	7_28180957	29411274	6.1583	7.501	-0.0952	208.7796-209.4312
SND	qbSND2-1	2H	123	2_514353957	645373132	2HL_13648618	645218857	10.2804	17.7293	0.166	122.9775-123.4415
	qbSND3-1	3H	3	3_558269837	695723892	GBM1238	687765899	3.4197	5.262	0.0822	2.1552-3.2
	qbSND3-2	3H	79	3HL_21306461	532662956	3HL_21303890	N/A	4.0144	6.3653	-0.0904	78.6892-79.186
	qbSND3-3	3H	205	3_34191994	37469142	3HS_1093997	37177869	4.1064	6.3211	-0.0899	204.4948-205.7444
	qbSND5-1	5H	186	5HL_8494280	497560271	5HL_11658154	499667011	3.8246	5.8331	-0.0864	185.785-186.1415
	qbSND7-1	7H	166	7HS_5799924	166039715	Bmag571	169396717	5.6872	9.4811	0.1119	165.6712-166.2904
TND	qbTND2-1	2H	75	2HL_25534662	473353900	M_207663_343	469357816	5.4459	5.8441	0.095	74.74-75.3875
	qbTND2-2	2H	123	2_514353957	645373132	2HL_13648618	645218857	11.9253	14.6437	0.16	122.9775-123.4415
	qbTND3-1	3H	1	3HL_3879907	686561576	4HL_43169025	688246839	3.5945	3.7868	0.0741	0.962-1.5024
	qbTND3-2	3H	79	3HL_21306461	532662956	3HL_21303890	N/A	5.2061	5.8307	-0.0918	78.6892-79.186
	qbTND3-3	3H	206	3HS_1093997	37177869	3_28890185	34958927	4.8958	5.495	-0.0888	205.7444-207.0068
	qbTND4-1	4H	148	4_16553551	15498285	4HS_28564347	16168641	4.9281	5.3073	0.0882	147.7155-148.359
	qbTND5-1	5H	18	5_6313908	6809742	GBM1176	9866452	6.4136	7.857	-0.1062	11.274-21.0335
	qbTND7-1	7H	180	7HS_24633706	109650557	7HS_16458224	110321600	4.9997	5.3512	0.0878	179.6304-180.008
UIL	qbUIL3-1	3H	33	3_511749149	633068871	3_504106156	626219541	15.6363	32.5587	2.1611	32.7168-35.9128
	qbUIL6-1	6H	85	2HS_26945700	91148733	6_451975519	492894732	3.9522	6.5484	0.883	84.705-85.174
SIL	qbSIL1-1	1H	108	1H_46993132	57669357	1H_35430201	57671726	4.5974	2.1614	0.4036	107.579-108.0345
	qbSIL3-1	3H	33	3_511749149	633068871	3_504106156	626219541	32.2277	27.4746	1.5745	32.7168-35.9128
	qbSIL3-2	3H	191	M_168364_1478	115928536	3HS_28871858	105748147	11.0121	6.0163	0.6718	190.2972-191.4204
	qbSIL6-1	6H	77	6HL_26706644	517073082	GBM1256	510422775	12.0367	6.9327	0.7177	76.614-78.125
	qbSIL6-2	6H	99	6HL_1116639	442686835	M_2548146_2058	438477514	6.7347	3.2985	-0.4954	98.946-99.2635
	qbSIL7-1	7H	66	7HL_37199773	561268251	7HL_4313756	555595912	11.761	6.4987	0.6938	65.7472-66.2088
	qbSIL7-2	7H	107	7_266425095	310830238	1H_82374297	312687869	18.5629	11.6658	0.9423	106.6924-107.522
TIL	qbTIL3-1	3H	33	3_511749149	633068871	3_504106156	626219541	20.7132	30.9139	1.2742	32.7168-35.9128
	qbTIL7-1	7H	134	7HS_17906516	297271174	M_101938_837	382248750	22.0052	33.4417	1.2136	133.186-134.4116
UID	qbUID2-1	2H	79	M_223185_603	473725143	M_167678_1523	460965640	5.9467	7.9228	0.0795	78.981-79.797
	qbUID2-2	2H	162	2HL_18227895	695817238	2_579576154	696239898	5.7324	7.6135	0.0764	161.9905-162.4365
	qbUID3-1	3H	79	3HL_21306461	532662956	3HL_21303890	NA	5.3688	7.3127	-0.0744	78.6892-79.186
	qbUID3-2	3H	210	3_28198240	33791042	M_112120_1515	30233330	3.5638	4.8317	-0.0604	209.1984-211.322
	qbUID4-1	4H	29	4HL_45045821	614726458	4HL_6409134	599964924	6.9959	9.5306	-0.0859	28.9585-35.5015
	qbUID4-2	4H	151	4HS_28564347	16168641	M_2553137_482	14606515	6.2657	8.4985	0.0805	148.359-151.3395
	qbUID5-1	5H	1	5_54803	433302	5_3871196	4150809	3.0712	3.8911	-0.0541	0.842-4.492
SID	qbSID2-1	2H	75	2HL_25534662	473353900	M_207663_343	469357816	4.9863	5.3332	0.0957	74.74-75.3875
	qbSID2-2	2H	131	2_524782265	651533453	2HL_41874761	662261965	11.2126	13.6353	0.1592	129.6285-131.0985
	qbSID3-1	3H	205	3_34191994	37469142	3HS_1093997	37177869	3.8516	4.0841	-0.0808	204.4948-205.7444
	qbSID4-1	4H	28	4HL_39593094	614166557	4HL_45045821	614726458	5.0164	5.4549	-0.0945	27.962-28.9585
	qbSID4-2	4H	148	4_16553551	15498285	4HS_28564347	16168641	11.9476	15.1461	0.157	147.7155-148.359
	qbSID5-1	5H	0	5HS_7374618	2568671	5_54803	433302	6.1217	6.6892	-0.1033	0-0.842
	qbSID5-2	5H	91	5HS_10059836	158200363	5HS_21724907	91675771	3.619	4.0511	-0.0862	90.7595-92.3275
TID	qbTID2-1	2H	95	M_230635_804	N/A	M_54203_5996	548616942	11.155	13.3885	0.1585	94.4105-95.121
	qbTID2-2	2H	132	2_531230596	662451044	2HL_43143355	668047109	8.2651	9.4388	0.1394	131.463-132.495
	qbTID3-1	3H	45	3HL_12268950	615045506	3HL_40362485	613525966	3.1316	3.1981	-0.0768	44.0972-45.104
	qbTID3-2	3H	205	3_34191994	37469142	3HS_1093997	37177869	3.8211	3.967	-0.0835	204.4948-205.7444
	qbTID4-1	4H	32	4HL_45045821	614726458	4HL_6409134	599964924	4.6087	5.5796	-0.0995	28.9585-35.5015
	qbTID4-2	4H	148	4_16553551	15498285	4HS_28564347	16168641	13.2209	16.5047	0.172	147.7155-148.359
	qbTID5-1	5H	4	5_54803	433302	5_3871196	4150809	7.9274	8.9324	-0.125	0.842-4.492
LI	qbLI3-1	3H	33	3_511749149	633068871	3_504106156	626219541	13.9562	22.6944	0.932	32.7168-35.9128
	qbLI7-1	7H	134	7HS_17906516	297271174	M_101938_837	382248750	19.9813	37.0156	1.0923	133.186-134.4116
SW	qbSW2-1	2H	79	M_223185_603	473725143	M_167678_1523	460965640	6.4922	9.0536	0.3192	78.981-79.797
	qbSW2-2	2H	176	2_588885691	713290271	2HL_14160939	NA	3.1614	4.161	0.2146	175.9015-176.9925
	qbSW3-1	3H	79	3HL_21306461	532662956	3HL_21303890	N/A	9.43	14.3741	-0.392	78.6892-79.186
	qbSW4-1	4H	163	M_282112_578	4471498	4_3860802	410455	4.6743	6.4788	0.2618	162.7925-164.1715
	qbSW7-1	7H	161	7HS_33151126	214882817	M_262022_735	167591333	12.718	20.0776	0.47	160.9692-163.922
TIBF	qbTIBF2-1	2H	137	M_165611_94	671629490	2_535589467	670567438	8.1257	19.6655	0.979	136.7935-137.424
	qbTIBF3-1	3H	52	3HL_33151823	599149306	3HL_45910009	602916011	4.4696	10.1195	-0.6455	51.7392-52.0672
	qbTIBF5-1	5H	18	5_6313908	6809742	GBM1176	9866452	5.2534	13.4294	-0.7432	11.274-21.0335
	qbTIBF6-1	6H	128	6HL_1993657	354336603	6_307582762	375847495	3.5152	7.8927	0.5831	127.579-128.0695
MSL	qbMSL1-1	1H	118	1_41342487	33666873	1H_84570760	29734630	4.5568	2.428	1.2682	117.433-119.1895
	qbMSL2-1	2H	128	2_522610509	648988609	2HL_34260490	128.677	3.0318	1.5144	1.0799	127.9575-128.677
	qbMSL3-1	3H	33	3_511749149	633068871	3_504106156	626219541	26.7831	22.0275	4.2168	32.7168-35.9128
	qbMSL3-2	3H	127	M_224438_795	191801793	3HS_8199020	195478630	15.8222	10.5738	2.6501	126.7864-127.308
	qbMSL3-3	3H	155	3HL_22346532	345646020	3HS_36183965	240422618	27.6723	22.8235	-3.9049	154.7288-155.012
	qbMSL6-1	6H	77	6HL_26706644	517073082	GBM1256	510422775	9.4523	5.6286	1.9299	76.614-78.125
	qbMSL7-1	7H	19	7_579149290	635572991	7HL_24591633	632886698	8.1294	4.4563	1.8145	18.1168-19.0676
	qbMSL7-2	7H	134	7HS_17906516	297271174	M_101938_837	382248750	27.1884	22.5815	3.9077	133.186-134.4116
a uppermost node diameter (UND), second node diameter (SND), third node diameter (TND), uppermost internode diameter (UID) internode length (TIL), The same as below.
b Chromosome. The same as below.
c The phenotypic variation explained (in %) by each QTL. The same as below.
d Additive effect; +, positive allele coming from Huadamai 6; −, positive allele coming from Huaai 11. The same as below.
e 1.5-LOD confidence interval. The same as below.

## Sheet: Table S7
Table S7. Chromosomes location of stable QTLs for 13 stem traits
QTL	Chr.	Position(cM)	Physical interval(Mb)	LOD	PVE	ADD	Year
qSW2-1	2H	79	460.97-473.73	3.78-6.49	6.54-10.33	+	2021, 2022, BLUP
qTND2-1	2H	79	460.97-473.35	5.45-9.82	5.84-17.84	+	2021, BLUP
qTID2-2	2H	95	541.63-548.62	11.16-12.91	13.39-19.49	+	2021, BLUP
qUND2-2	2H	123	645.22-645.37	8.67-9.88	12.71-16.79	+	2022, BLUP
qSND2-1	2H	123	645.22-645.37	7.34-10.28	16.11-17.73	+	2021, BLUP
qTND2-2	2H	123	645.22-645.37	11.01-11.93	14.64-21.05	+	2022, BLUP
qSID2-4	2H	132	651.47-668.05	5.73-11.21	9.6-15.19	+	2021, 2022, BLUP
qTID2-4	2H	132	662.45-668.05	7.93-8.27	9.44-11.21	+	2021, BLUP
qTIBF2-1	2H	137	670.57-671.63	8.13-10.49	19.67-24.93	+	2021, BLUP
qTND3-1	3H	0	686.56-688.73	3.59-4.86	3.79-8.19	+	2022, BLUP
qSND3-1	3H	3	687.77-695.72	3.01-3.42	5.1-5.26	+	2022, BLUP
qTIL3-1	3H	33	632.55-633.07	15.71-22.4	31.75-32.94	+	2021, 2022, BLUP
qUIL3-1	3H	33	632.55-633.07	12.9-15.64	20.99-32.56	+	2021, 2022, BLUP
qSIL3-1	3H	33	632.55-633.07	30.45-32.23	24.47-38.97	+	2021, 2022, BLUP
qLI3-1	3H	33	632.55-633.07	9.5-14.39	15.46-23.97	+	2021, 2022, BLUP
qMSL3-1	3H	33	632.55-633.07	17.02-26.78	17.52-39.84	+	2021, 2022, BLUP
qTIBF3-1	3H	52	599.15-602.92	3.82-4.89	9.5-10.39	-	2021, 2022, BLUP
qTID3-1	3H	52	599.15-602.92	4.42-8.82	5.58-12.76	-	2021, 2022
qSND3-2	3H	79	530.99-532.66	3.87-4.01	6.36-8.18	-	2021, BLUP
qTND3-2	3H	79	530.99-532.66	4.49-5.21	5.83-7.45	-	2021, BLUP
qUID3-1	3H	79	530.99-532.66	5.37-6.98	7.31-15.73	-	2021, 2022, BLUP
qSW3-1	3H	79	530.99-532.66	7.46-9.43	14.15-14.37	-	2021, BLUP
qSID3-2	3H	206	34.96-37.47	3.85-5.84	4.08-10.08	-	2022, BLUP
qcUID3-2	3H	220	12.78-23.92	3.17-3.22	6.18-9.17	-	2021, 2022
qSID4-1	4H	28	614.17-614.73	3.7-5.02	5.45-5.98	-	2021, 2022, BLUP
qUID4-1	4H	29	599.96-614.73	6.08-7	9.53-13.74	-	2021, 2022, BLUP
qUND4-1	4H	29	599.96-614.73	4.01-6.14	5.38-8.07	-	2021, BLUP
qSID4-2	4H	148	15.5-16.17	10.52-11.95	15.15-19.65	+	2021, 2022, BLUP
qTID4-1	4H	148	15.5-16.17	10.41-13.22	14.99-16.5	+	2021, BLUP
qUND4-2	4H	148	15.5-16.17	5.61-6	6.82-8.42	+	2021, BLUP
qUID4-3	4H	151\158	7.86-16.17	4.2-6.27	7.01-10.44	+	2021, 2022, BLUP
qSW4-1	4H	163	0.41-4.47	3.07-4.67	5.41-6.48	+	2021, BLUP
qSID5-1	5H	4	0.43-4.15	3.05-6.12	4.87-7.73	-	2021, 2022, BLUP								+	20212022	Rt
qTID5-1	5H	4	0.43-4.15	5.05-8.82	6.52-12.82	-	2021, 2022, BLUP								+	20212022	Rt
qTIBF5-1	5H	20	6.81-9.87	4.68-5.25	10.31-15.48	-	2021, 2022, BLUP								-	20212022	Rt
qTND5-1	5H	4\20	0.43-13.28	3.94-6.41	6.36-11.5	-	2021, 2022, BLUP								+	20212022	Rt
qMSL6-1	6H	77	510.42-517.07	5.31-10.59	4.56-11.7	+	2021, 2022, BLUP
qcUIL6-1	6H	84	91.14-91.15	3.35-3.64	5.82-6.63	+	2021, 2022
qTIBF6-1	6H	128	354.34-375.85	3.45-3.52	7.33-7.89	+	2021, BLUP
qSIL7-2	7H	65	555.6-563.86	6.38-11.76	4.81-6.5	+	2022, BLUP
qSIL7-3	7H	107	265.48-345.2	18.56-32.68	11.67-39.05	+	2021, BLUP
qcMSL7-2	7H	126	264.8-264.81	16.48-20.53	21.08-33.61	+	2021, 2022
qLI7-2	7H	134	297.29-382.25	12.98-19.98	22.69-37.02	+	2021, 2022, BLUP
qTIL7-1	7H	134	297.29-382.25	12.96-22.01	24.32-33.44	+	2021, 2022, BLUP
qcSIL7-1	7H	137	337.03-358.83	10.07-21	14.65-43.57	+	2021, 2022
qMSL7-3	7H	151	225.25-382.25	16.49-27.19	20.09-22.58	+	2022, BLUP
qSW7-1	7H	161	167.59-214.88	6.34-12.72	11.4-20.08	+	2021, 2022, BLUP
qUND7-1	7H	184	75.24-87.38	3.5-13.46	6.26-21.77	+	2021, 2022, BLUP
qUND7-2	7H	209	29.41-29.95	4.58-6.16	6.25-7.5	-	2021, BLUP

## Sheet: Table S8
Table S8. Genes located within major QTLs intervals.
.	Start	End	Gene_id	gene_source
2H	645282805	645284783	HORVU2Hr1G090690	ibsc
2H	645379545	645380699	HORVU2Hr1G090730	ibsc
2H	645388520	645390248	HORVU2Hr1G090740	ibsc
2H	645396406	645396928	HORVU2Hr1G090750	ibsc
2H	645484946	645485677	HORVU2Hr1G090760	ibsc
2H	645588093	645596188	HORVU2Hr1G090800	ibsc
2H	645591788	645596378	HORVU2Hr1G090810	ibsc
2H	645624249	645624798	HORVU2Hr1G090820	ibsc
2H	645680847	645683690	HORVU2Hr1G090830	ibsc
2H	646005661	646005893	HORVU2Hr1G090890	ibsc
2H	646210512	646212847	HORVU2Hr1G090910	ibsc
2H	646213313	646213386	ENSRNA049910395	tRNA-Thr
2H	646242719	646244142	HORVU2Hr1G090920	ibsc
2H	646251222	646252177	HORVU2Hr1G090930	ibsc
2H	646388585	646396853	HORVU2Hr1G090950	ibsc
2H	646392625	646397894	HORVU2Hr1G090960	ibsc
2H	646574979	646577033	HORVU2Hr1G090970	ibsc
2H	646656287	646661459	HORVU2Hr1G090980	ibsc
2H	646872648	646879635	HORVU2Hr1G091010	ibsc
2H	646926402	646926731	HORVU2Hr1G091020	ibsc
2H	646930069	646939693	HORVU2Hr1G091030	ibsc
2H	646941449	646941970	HORVU2Hr1G091060	ibsc
2H	647060931	647061260	HORVU2Hr1G091080	ibsc
2H	647062456	647064323	HORVU2Hr1G091090	ibsc
2H	647115265	647116389	HORVU2Hr1G091100	ibsc
2H	647117238	647117828	HORVU2Hr1G091110	ibsc
2H	647133101	647136107	HORVU2Hr1G091130	ibsc
2H	647214976	647217653	HORVU2Hr1G091160	ibsc
2H	647252087	647258342	HORVU2Hr1G091170	ibsc
2H	647274526	647277383	HORVU2Hr1G091180	ibsc
2H	647278826	647282664	HORVU2Hr1G091190	ibsc
2H	647300676	647304039	HORVU2Hr1G091200	ibsc
2H	647312810	647317007	HORVU2Hr1G091220	ibsc
2H	647313038	647322216	HORVU2Hr1G091230	ibsc
2H	647454060	647457503	HORVU2Hr1G091270	ibsc
2H	647542219	647544111	HORVU2Hr1G091280	ibsc
2H	647546927	647556341	HORVU2Hr1G091290	ibsc
2H	647661433	647668395	HORVU2Hr1G091320	ibsc
2H	647828573	647831604	HORVU2Hr1G091360	ibsc
2H	647831678	647838081	HORVU2Hr1G091370	ibsc
2H	647928900	647931932	HORVU2Hr1G091380	ibsc
2H	647932298	647934103	HORVU2Hr1G091390	ibsc
2H	647934754	647936537	HORVU2Hr1G091400	ibsc
2H	648021704	648023559	HORVU2Hr1G091410	ibsc
2H	648052058	648053989	HORVU2Hr1G091430	ibsc
2H	648064375	648066772	HORVU2Hr1G091440	ibsc
2H	648082052	648083820	HORVU2Hr1G091460	ibsc
2H	648084804	648085035	HORVU2Hr1G091470	ibsc
2H	648114419	648114574	HORVU2Hr1G091480	ibsc
2H	648127647	648129194	HORVU2Hr1G091500	ibsc
2H	648230291	648231491	HORVU2Hr1G091520	ibsc
2H	648279937	648487245	HORVU2Hr1G091530	ibsc
2H	648487326	648487981	HORVU2Hr1G091550	ibsc
2H	648515999	648516959	HORVU2Hr1G091580	ibsc
2H	648553135	648557883	HORVU2Hr1G091590	ibsc
2H	648578136	648578701	HORVU2Hr1G091610	ibsc
2H	648824301	648826151	HORVU2Hr1G091630	ibsc
2H	648907483	648907819	HORVU2Hr1G091660	ibsc
2H	649203485	649232890	HORVU2Hr1G091680	ibsc
2H	649447327	649449948	HORVU2Hr1G091720	ibsc
2H	649500756	649502079	HORVU2Hr1G091780	ibsc
2H	649522466	649523506	HORVU2Hr1G091790	ibsc
2H	649532894	649537574	HORVU2Hr1G091800	ibsc
2H	649645044	649649558	HORVU2Hr1G091830	ibsc
2H	649649420	649657909	HORVU2Hr1G091840	ibsc
2H	649733130	649736343	HORVU2Hr1G091850	ibsc
2H	649811889	649819051	HORVU2Hr1G091870	ibsc
2H	649971828	649978124	HORVU2Hr1G091880	ibsc
2H	649971910	649976354	HORVU2Hr1G091890	ibsc
2H	650018408	650024053	HORVU2Hr1G091910	ibsc
2H	650058305	650060118	HORVU2Hr1G091920	ibsc
2H	650203228	650205120	HORVU2Hr1G091990	ibsc
2H	650225812	650227726	HORVU2Hr1G092000	ibsc
2H	650226537	650231060	HORVU2Hr1G092010	ibsc
2H	650452493	650457428	HORVU2Hr1G092030	ibsc
2H	650456584	650456772	HORVU2Hr1G092040	ibsc
2H	650477335	650482423	HORVU2Hr1G092050	ibsc
2H	650675862	650676756	HORVU2Hr1G092060	ibsc
2H	650773966	650775199	HORVU2Hr1G092070	ibsc
2H	650897742	651060215	HORVU2Hr1G092080	ibsc
2H	650899859	650900692	HORVU2Hr1G092090	ibsc
2H	650900421	650904105	HORVU2Hr1G092100	ibsc
2H	651248931	651249349	HORVU2Hr1G092170	ibsc
2H	651370368	651374936	HORVU2Hr1G092180	ibsc
2H	651377631	651380961	HORVU2Hr1G092190	ibsc
2H	651398906	651399727	HORVU2Hr1G092200	ibsc
2H	651461031	651469206	HORVU2Hr1G092230	ibsc
2H	651528086	651534019	HORVU2Hr1G092250	ibsc
2H	651534346	651540462	HORVU2Hr1G092260	ibsc
2H	651676342	651677589	HORVU2Hr1G092270	ibsc
2H	651692336	651693555	HORVU2Hr1G092280	ibsc
2H	652031058	652032990	HORVU2Hr1G092290	ibsc
2H	652093963	652095055	HORVU2Hr1G092300	ibsc
2H	652416364	652419744	HORVU2Hr1G092340	ibsc
2H	652463088	652464999	HORVU2Hr1G092350	ibsc
2H	652499287	652502830	HORVU2Hr1G092360	ibsc
2H	652710524	652710857	HORVU2Hr1G092370	ibsc
2H	652744663	652751299	HORVU2Hr1G092380	ibsc
2H	652762994	652764448	HORVU2Hr1G092390	ibsc
2H	652765009	652765532	HORVU2Hr1G092400	ibsc
2H	653323469	653360286	HORVU2Hr1G092420	ibsc
2H	653371368	653371439	ENSRNA049439281	tRNA-Pro
2H	653414730	653422788	HORVU2Hr1G092430	ibsc
2H	653533189	653535350	HORVU2Hr1G092460	ibsc
2H	653804732	653807000	HORVU2Hr1G092510	ibsc
2H	653927156	653940237	HORVU2Hr1G092520	ibsc
2H	653946383	653985593	HORVU2Hr1G092530	ibsc
2H	653980880	653981344	HORVU2Hr1G092540	ibsc
2H	654047316	654048041	HORVU2Hr1G092570	ibsc
2H	654049357	654049824	HORVU2Hr1G092580	ibsc
2H	654157450	654168952	HORVU2Hr1G092600	ibsc
2H	654598506	654602374	HORVU2Hr1G092650	ibsc
2H	654700278	654701227	HORVU2Hr1G092680	ibsc
2H	654954548	654961115	HORVU2Hr1G092690	ibsc
2H	654963159	654965963	HORVU2Hr1G092710	ibsc
2H	655110306	655114274	HORVU2Hr1G092730	ibsc
2H	655129440	655131630	HORVU2Hr1G092740	ibsc
2H	655136809	655138805	HORVU2Hr1G092750	ibsc
2H	655139374	655139842	HORVU2Hr1G092760	ibsc
2H	655203590	655204447	HORVU2Hr1G092780	ibsc
2H	655324184	655329172	HORVU2Hr1G092800	ibsc
2H	655347877	655401933	HORVU2Hr1G092810	ibsc
2H	655479964	655483904	HORVU2Hr1G092820	ibsc
2H	655507501	655511651	HORVU2Hr1G092840	ibsc
2H	655507925	655514509	HORVU2Hr1G092850	ibsc
2H	655536519	655538507	HORVU2Hr1G092880	ibsc
2H	655543780	655544004	HORVU2Hr1G092890	ibsc
2H	655813873	655816213	HORVU2Hr1G092900	ibsc
2H	655819700	655823545	HORVU2Hr1G092920	ibsc
2H	655873271	655877892	HORVU2Hr1G092930	ibsc
2H	655878170	655886316	HORVU2Hr1G092940	ibsc
2H	655996718	655997180	HORVU2Hr1G092950	ibsc
2H	656009941	656014597	HORVU2Hr1G092960	ibsc
2H	656016129	656016254	HORVU2Hr1G092970	ibsc
2H	656017732	656023394	HORVU2Hr1G092980	ibsc
2H	656188019	656192857	HORVU2Hr1G093000	ibsc
2H	656338798	656339091	HORVU2Hr1G093010	ibsc
2H	656410958	656417166	HORVU2Hr1G093020	ibsc
2H	656413336	656415155	HORVU2Hr1G093030	ibsc
2H	656477678	656598859	HORVU2Hr1G093050	ibsc
2H	656491502	656491966	HORVU2Hr1G093070	ibsc
2H	656949757	656953009	HORVU2Hr1G093100	ibsc
2H	657018814	657021561	HORVU2Hr1G093140	ibsc
2H	657022651	657025401	HORVU2Hr1G093150	ibsc
2H	657157285	657159402	HORVU2Hr1G093160	ibsc
2H	657190748	657192369	HORVU2Hr1G093180	ibsc
2H	657192837	657193477	HORVU2Hr1G093190	ibsc
2H	657222272	657223092	HORVU2Hr1G093200	ibsc
2H	657352734	657355073	HORVU2Hr1G093210	ibsc
2H	657560666	657564910	HORVU2Hr1G093220	ibsc
2H	657566989	657571515	HORVU2Hr1G093230	ibsc
2H	657635499	657636139	HORVU2Hr1G093250	ibsc
2H	657647929	657648922	HORVU2Hr1G093260	ibsc
2H	657659735	657660073	HORVU2Hr1G093280	ibsc
2H	657669286	657669691	HORVU2Hr1G093310	ibsc
2H	657750539	657758412	HORVU2Hr1G093330	ibsc
2H	657822736	657827109	HORVU2Hr1G093350	ibsc
2H	658220168	658221677	HORVU2Hr1G093380	ibsc
2H	658223906	658227461	HORVU2Hr1G093390	ibsc
2H	658229065	658233369	HORVU2Hr1G093400	ibsc
2H	658255261	658258093	HORVU2Hr1G093410	ibsc
2H	658259932	658264215	HORVU2Hr1G093420	ibsc
2H	658374945	658375969	HORVU2Hr1G093430	ibsc
2H	658384963	658385081	ENSRNA049481401	5S_rRNA
2H	658385374	658385492	ENSRNA049481406	5S_rRNA
2H	658385995	658386113	ENSRNA049481412	5S_rRNA
2H	658506062	658512755	HORVU2Hr1G093480	ibsc
2H	658625259	658632245	HORVU2Hr1G093490	ibsc
2H	658694732	658696335	HORVU2Hr1G093530	ibsc
2H	658701219	658702639	HORVU2Hr1G093540	ibsc
2H	658831215	658835713	HORVU2Hr1G093570	ibsc
2H	658836131	658840020	HORVU2Hr1G093580	ibsc
2H	658887928	658966241	HORVU2Hr1G093610	ibsc
2H	658901072	658915238	HORVU2Hr1G093640	ibsc
2H	658971366	658971759	HORVU2Hr1G093650	ibsc
2H	659081830	659083161	HORVU2Hr1G093660	ibsc
2H	659157910	659408434	HORVU2Hr1G093670	ibsc
2H	659200247	659202995	HORVU2Hr1G093680	ibsc
2H	659203149	659209552	HORVU2Hr1G093690	ibsc
2H	659246447	659247182	HORVU2Hr1G093700	ibsc
2H	659264340	659267036	HORVU2Hr1G093720	ibsc
2H	659394802	659395519	HORVU2Hr1G093730	ibsc
2H	659587555	659588228	HORVU2Hr1G093770	ibsc
2H	659630829	659631035	HORVU2Hr1G093780	ibsc
2H	659681381	659686187	HORVU2Hr1G093800	ibsc
2H	659716173	659722425	HORVU2Hr1G093810	ibsc
2H	659886176	659923823	HORVU2Hr1G093840	ibsc
2H	659940138	659942888	HORVU2Hr1G093870	ibsc
2H	659943514	659945656	HORVU2Hr1G093880	ibsc
2H	660976259	660983580	HORVU2Hr1G093930	ibsc
2H	661233128	661244493	HORVU2Hr1G093950	ibsc
2H	661510873	661512183	ENSRNA049477692	LSU_rRNA_eukarya
2H	661572673	661574469	HORVU2Hr1G093960	ibsc
2H	661677557	661678851	HORVU2Hr1G093980	ibsc
2H	661919489	661921299	HORVU2Hr1G094020	ibsc
2H	662015232	662019114	HORVU2Hr1G094030	ibsc
2H	662052948	662056833	HORVU2Hr1G094040	ibsc
2H	662298334	662300891	HORVU2Hr1G094080	ibsc
2H	662749067	662750469	HORVU2Hr1G094090	ibsc
2H	663232468	663242554	HORVU2Hr1G094110	ibsc
2H	663295359	663298321	HORVU2Hr1G094140	ibsc
2H	663384581	663386062	HORVU2Hr1G094150	ibsc
2H	663531083	663533549	HORVU2Hr1G094160	ibsc
2H	663603338	663604908	HORVU2Hr1G094180	ibsc
2H	663643530	663645270	HORVU2Hr1G094190	ibsc
2H	663677520	663681286	HORVU2Hr1G094200	ibsc
2H	663677713	663677786	ENSRNA049477677	snoZ199
2H	663677966	663678058	ENSRNA049477682	snoR64
2H	663678136	663678234	ENSRNA049477691	snoZ103
2H	663678297	663678395	ENSRNA049477688	snoZ103
2H	663678642	663678715	ENSRNA049477674	snoZ199
2H	663678830	663678974	ENSRNA049477685	snoR135
2H	663704825	663706062	HORVU2Hr1G094220	ibsc
2H	663877026	663880165	HORVU2Hr1G094230	ibsc
2H	663983126	663984285	HORVU2Hr1G094240	ibsc
2H	664062885	664068215	HORVU2Hr1G094280	ibsc
2H	664078264	664082132	HORVU2Hr1G094290	ibsc
2H	664124973	664128031	HORVU2Hr1G094310	ibsc
2H	664183153	664187306	HORVU2Hr1G094320	ibsc
2H	664187700	664190974	HORVU2Hr1G094330	ibsc
2H	664191333	664192843	HORVU2Hr1G094340	ibsc
2H	664225825	664226328	HORVU2Hr1G094350	ibsc
2H	664447093	664451602	HORVU2Hr1G094360	ibsc
2H	664500832	664501782	HORVU2Hr1G094370	ibsc
2H	664570494	664576298	HORVU2Hr1G094380	ibsc
2H	664802578	664808650	HORVU2Hr1G094390	ibsc
2H	664812563	664813724	HORVU2Hr1G094400	ibsc
2H	664832276	664842145	HORVU2Hr1G094410	ibsc
2H	664843252	664851239	HORVU2Hr1G094420	ibsc
2H	664848344	664856819	HORVU2Hr1G094450	ibsc
2H	664885406	664887892	HORVU2Hr1G094460	ibsc
2H	664889372	664891461	HORVU2Hr1G094470	ibsc
2H	664928686	664929039	HORVU2Hr1G094480	ibsc
2H	664937221	664938271	HORVU2Hr1G094490	ibsc
2H	665045513	665045797	HORVU2Hr1G094500	ibsc
2H	665051225	665053954	HORVU2Hr1G094510	ibsc
2H	665303891	665305884	HORVU2Hr1G094540	ibsc
2H	665334420	665334677	HORVU2Hr1G094580	ibsc
2H	665334855	665335151	HORVU2Hr1G094600	ibsc
2H	665448011	665448280	HORVU2Hr1G094610	ibsc
2H	665452010	665455017	HORVU2Hr1G094620	ibsc
2H	665621450	665623669	HORVU2Hr1G094630	ibsc
2H	665638474	665642728	HORVU2Hr1G094650	ibsc
2H	665643030	665645623	HORVU2Hr1G094660	ibsc
2H	665879296	665881316	HORVU2Hr1G094670	ibsc
2H	666006418	666124776	HORVU2Hr1G094680	ibsc
2H	666008094	666015438	HORVU2Hr1G094690	ibsc
2H	666206010	666207149	HORVU2Hr1G094730	ibsc
2H	666254418	666257419	HORVU2Hr1G094740	ibsc
2H	666360280	666364191	HORVU2Hr1G094760	ibsc
2H	666365771	666366394	HORVU2Hr1G094770	ibsc
2H	666372180	666374190	HORVU2Hr1G094780	ibsc
2H	666606491	666606920	HORVU2Hr1G094790	ibsc
2H	666837932	666840632	HORVU2Hr1G094810	ibsc
2H	666995353	667001073	HORVU2Hr1G094840	ibsc
2H	667052853	667053709	HORVU2Hr1G094860	ibsc
2H	667135489	667138306	HORVU2Hr1G094870	ibsc
2H	667433105	667438596	HORVU2Hr1G094890	ibsc
2H	667472461	667472667	HORVU2Hr1G094910	ibsc
2H	667473091	667473423	HORVU2Hr1G094930	ibsc
2H	667499807	667502450	HORVU2Hr1G094960	ibsc
2H	667552761	667557686	HORVU2Hr1G094980	ibsc
2H	667806910	667808798	HORVU2Hr1G095010	ibsc
2H	667823235	667827181	HORVU2Hr1G095030	ibsc
2H	667838238	667839392	HORVU2Hr1G095050	ibsc
2H	667894326	667897598	HORVU2Hr1G095070	ibsc
2H	667903135	667906135	HORVU2Hr1G095080	ibsc
2H	667938402	667940012	HORVU2Hr1G095090	ibsc
2H	667975779	667976589	HORVU2Hr1G095100	ibsc
2H	668116584	668116656	ENSRNA049439316	tRNA-Val
2H	668231983	668336507	HORVU2Hr1G095130	ibsc
2H	668599199	668599460	HORVU2Hr1G095140	ibsc
2H	668601888	668605306	HORVU2Hr1G095150	ibsc
2H	668833510	668840320	HORVU2Hr1G095160	ibsc
2H	668833610	668840275	HORVU2Hr1G095170	ibsc
2H	668997933	669004655	HORVU2Hr1G095210	ibsc
2H	669005028	669009842	HORVU2Hr1G095220	ibsc
2H	669081623	669082470	HORVU2Hr1G095260	ibsc
2H	669130745	669137879	HORVU2Hr1G095310	ibsc
2H	669175313	669176934	HORVU2Hr1G095320	ibsc
2H	669277168	669282342	HORVU2Hr1G095340	ibsc
2H	669349559	669355499	HORVU2Hr1G095360	ibsc
2H	669560144	669562123	HORVU2Hr1G095390	ibsc
2H	669732778	669733458	HORVU2Hr1G095400	ibsc
2H	669741373	669745253	HORVU2Hr1G095410	ibsc
2H	669950024	669950666	HORVU2Hr1G095430	ibsc
2H	670007487	670008519	HORVU2Hr1G095440	ibsc
2H	670011104	670011926	HORVU2Hr1G095450	ibsc
2H	670098281	670099514	HORVU2Hr1G095460	ibsc
2H	670101858	670103000	HORVU2Hr1G095470	ibsc
2H	670212297	670230135	HORVU2Hr1G095490	ibsc
2H	670238826	670239577	HORVU2Hr1G095500	ibsc
2H	670241705	670243513	HORVU2Hr1G095510	ibsc
2H	670282058	670282636	HORVU2Hr1G095520	ibsc
2H	670392803	670396591	HORVU2Hr1G095530	ibsc
2H	670595685	670598481	HORVU2Hr1G095600	ibsc
2H	670722618	670722699	ENSRNA049481906	snoZ199
2H	670722858	670723145	HORVU2Hr1G095660	ibsc
2H	670766334	670767694	HORVU2Hr1G095690	ibsc
2H	670791054	670791862	HORVU2Hr1G095720	ibsc
2H	671328726	671329133	HORVU2Hr1G095750	ibsc
2H	541722635	541726283	HORVU2Hr1G075090	ibsc
2H	541757630	541760158	HORVU2Hr1G075110	ibsc
2H	542039207	542046521	HORVU2Hr1G075190	ibsc
2H	542055765	542056568	HORVU2Hr1G075200	ibsc
2H	542200706	542201465	HORVU2Hr1G075220	ibsc
2H	542372600	542379315	HORVU2Hr1G075230	ibsc
2H	542375949	542379959	HORVU2Hr1G075240	ibsc
2H	542447009	542448823	HORVU2Hr1G075270	ibsc
2H	542670212	542673023	HORVU2Hr1G075280	ibsc
2H	542970607	542972257	HORVU2Hr1G075290	ibsc
2H	542975841	542978167	HORVU2Hr1G075300	ibsc
2H	542989951	543046153	HORVU2Hr1G075330	ibsc
2H	543067234	543069561	HORVU2Hr1G075350	ibsc
2H	543299672	543301400	HORVU2Hr1G075370	ibsc
2H	543358547	543358764	HORVU2Hr1G075390	ibsc
2H	543436159	543438430	HORVU2Hr1G075400	ibsc
2H	543441864	543442121	HORVU2Hr1G075410	ibsc
2H	543447086	543452541	HORVU2Hr1G075420	ibsc
2H	543937019	543938559	HORVU2Hr1G075440	ibsc
2H	543943186	543948028	HORVU2Hr1G075450	ibsc
2H	543955706	543960490	HORVU2Hr1G075470	ibsc
2H	544042387	544042572	HORVU2Hr1G075520	ibsc
2H	544043854	544044009	HORVU2Hr1G075540	ibsc
2H	544044448	544044726	HORVU2Hr1G075560	ibsc
2H	544102903	544104437	HORVU2Hr1G075590	ibsc
2H	544395427	544456989	HORVU2Hr1G075610	ibsc
2H	544498922	544501322	HORVU2Hr1G075630	ibsc
2H	544605350	544605960	HORVU2Hr1G075640	ibsc
2H	544613271	544618771	HORVU2Hr1G075670	ibsc
2H	544778850	544783842	HORVU2Hr1G075680	ibsc
2H	544805116	544933166	HORVU2Hr1G075690	ibsc
2H	545081995	545082067	ENSRNA049910403	tRNA-Arg
2H	545139806	545146135	HORVU2Hr1G075710	ibsc
2H	545209778	545209850	ENSRNA049439102	tRNA-Arg
2H	545218139	545224905	HORVU2Hr1G075740	ibsc
2H	545225190	545226875	HORVU2Hr1G075770	ibsc
2H	545227227	545227860	HORVU2Hr1G075780	ibsc
2H	545237734	545241274	HORVU2Hr1G075790	ibsc
2H	545238502	545238608	ENSRNA049479910	snoR103
2H	545239386	545239490	ENSRNA049479917	snoR103
2H	545239526	545239630	ENSRNA049479898	snoR103
2H	545239702	545239806	ENSRNA049479924	snoR103
2H	545239878	545239982	ENSRNA049479928	snoR103
2H	545241304	545244816	HORVU2Hr1G075810	ibsc
2H	546366625	546378031	HORVU2Hr1G075850	ibsc
2H	546437349	546446695	HORVU2Hr1G075870	ibsc
2H	546663123	546665614	HORVU2Hr1G075900	ibsc
2H	546725641	546729358	HORVU2Hr1G075910	ibsc
2H	547122429	547123777	HORVU2Hr1G075920	ibsc
2H	547127453	547132416	HORVU2Hr1G075930	ibsc
2H	547192234	547192864	HORVU2Hr1G075940	ibsc
2H	547420245	547422120	HORVU2Hr1G075950	ibsc
2H	547534091	547534868	HORVU2Hr1G075960	ibsc
2H	547564037	547569898	HORVU2Hr1G075970	ibsc
2H	547660908	547677007	HORVU2Hr1G076000	ibsc
2H	547972429	547974579	HORVU2Hr1G076010	ibsc
2H	548131774	548134823	HORVU2Hr1G076060	ibsc
2H	548304633	548308181	HORVU2Hr1G076100	ibsc
2H	548325304	548326351	HORVU2Hr1G076120	ibsc
2H	461022885	461023900	HORVU2Hr1G066550	ibsc
2H	461606760	461615577	HORVU2Hr1G066560	ibsc
2H	461763773	461764149	HORVU2Hr1G066600	ibsc
2H	461764193	461764659	HORVU2Hr1G066610	ibsc
2H	461858460	461860979	HORVU2Hr1G066620	ibsc
2H	462131161	462133118	HORVU2Hr1G066630	ibsc
2H	462653552	462671143	HORVU2Hr1G066650	ibsc
2H	463227796	463231834	HORVU2Hr1G066680	ibsc
2H	463677932	463684107	HORVU2Hr1G066690	ibsc
2H	464118763	464124568	HORVU2Hr1G066740	ibsc
2H	464302284	464308316	HORVU2Hr1G066780	ibsc
2H	464525168	464533466	HORVU2Hr1G066790	ibsc
2H	464792976	464804344	HORVU2Hr1G066820	ibsc
2H	464798899	464804346	HORVU2Hr1G066830	ibsc
2H	465875015	465883930	HORVU2Hr1G066860	ibsc
2H	465885004	465887593	HORVU2Hr1G066890	ibsc
2H	466479637	466495353	HORVU2Hr1G066910	ibsc
2H	466588251	466618967	HORVU2Hr1G066920	ibsc
2H	466698966	466701554	HORVU2Hr1G066930	ibsc
2H	467290024	467291990	HORVU2Hr1G066940	ibsc
2H	467343557	467359330	HORVU2Hr1G066950	ibsc
2H	467762726	467764993	HORVU2Hr1G066970	ibsc
2H	469039959	469041062	HORVU2Hr1G067030	ibsc
2H	469041973	469066007	HORVU2Hr1G067040	ibsc
2H	469449070	469449556	HORVU2Hr1G067100	ibsc
2H	469725571	469883840	HORVU2Hr1G067110	ibsc
2H	469725595	469725915	HORVU2Hr1G067120	ibsc
2H	469777545	470017417	HORVU2Hr1G067130	ibsc
2H	469881761	469883540	HORVU2Hr1G067150	ibsc
2H	470252534	470254924	HORVU2Hr1G067170	ibsc
2H	470545861	470546074	HORVU2Hr1G067190	ibsc
2H	470779516	470779856	HORVU2Hr1G067230	ibsc
2H	470987020	470990573	HORVU2Hr1G067250	ibsc
2H	471090872	471092137	HORVU2Hr1G067270	ibsc
2H	471094350	471094913	HORVU2Hr1G067280	ibsc
2H	471221438	471229013	HORVU2Hr1G067290	ibsc
2H	471553335	471570583	HORVU2Hr1G067320	ibsc
2H	471607630	471723505	HORVU2Hr1G067330	ibsc
2H	471831943	472010325	HORVU2Hr1G067340	ibsc
2H	471835592	471904457	HORVU2Hr1G067350	ibsc
2H	472632504	472634909	HORVU2Hr1G067370	ibsc
2H	472731494	472753099	HORVU2Hr1G067390	ibsc
2H	472968551	472976915	HORVU2Hr1G067430	ibsc
2H	473427629	473435416	HORVU2Hr1G067610	ibsc
3H	686557832	686560958	HORVU3Hr1G112520	ibsc
3H	686680165	686683878	HORVU3Hr1G112590	ibsc
3H	686686695	686688785	HORVU3Hr1G112600	ibsc
3H	686697664	686699135	HORVU3Hr1G112610	ibsc
3H	686734426	686735113	HORVU3Hr1G112660	ibsc
3H	686737857	686746782	HORVU3Hr1G112670	ibsc
3H	686737908	686747391	HORVU3Hr1G112680	ibsc
3H	686748373	686753966	HORVU3Hr1G112690	ibsc
3H	686818861	686821343	HORVU3Hr1G112700	ibsc
3H	686829877	686830642	HORVU3Hr1G112710	ibsc
3H	686961588	686973293	HORVU3Hr1G112720	ibsc
3H	687055048	687056334	HORVU3Hr1G112740	ibsc
3H	687068709	687071810	HORVU3Hr1G112760	ibsc
3H	687125381	687126442	HORVU3Hr1G112800	ibsc
3H	687144826	687146385	HORVU3Hr1G112810	ibsc
3H	687187315	687188629	HORVU3Hr1G112830	ibsc
3H	687229005	687231879	HORVU3Hr1G112850	ibsc
3H	687236876	687241686	HORVU3Hr1G112860	ibsc
3H	687247303	687247622	HORVU3Hr1G112870	ibsc
3H	687290907	687291700	HORVU3Hr1G112880	ibsc
3H	687329128	687330560	HORVU3Hr1G112920	ibsc
3H	687383499	687389423	HORVU3Hr1G112930	ibsc
3H	687462869	687465861	HORVU3Hr1G112960	ibsc
3H	687472740	687476537	HORVU3Hr1G112990	ibsc
3H	687491946	687494257	HORVU3Hr1G113000	ibsc
3H	687498718	687500830	HORVU3Hr1G113010	ibsc
3H	687501754	687504159	HORVU3Hr1G113020	ibsc
3H	687518348	687520833	HORVU3Hr1G113050	ibsc
3H	687526758	687543507	HORVU3Hr1G113060	ibsc
3H	687536064	687539550	HORVU3Hr1G113070	ibsc
3H	687543729	687548547	HORVU3Hr1G113080	ibsc
3H	687547237	687550255	HORVU3Hr1G113090	ibsc
3H	687550768	687550847	ENSRNA049434724	tRNA-Leu
3H	687557562	687557641	ENSRNA049434716	tRNA-Leu
3H	687566522	687566601	ENSRNA049434711	tRNA-Leu
3H	687570052	687570131	ENSRNA049434708	tRNA-Leu
3H	687580249	687584924	HORVU3Hr1G113100	ibsc
3H	687585807	687586003	ENSRNA049488064	U2
3H	687719505	687719576	ENSRNA049436759	tRNA-Cys
3H	687719679	687722557	HORVU3Hr1G113110	ibsc
3H	687764626	687766158	HORVU3Hr1G113120	ibsc
3H	687832386	687841232	HORVU3Hr1G113130	ibsc
3H	687853326	687853990	HORVU3Hr1G113150	ibsc
3H	687859512	687865257	HORVU3Hr1G113160	ibsc
3H	687900246	687902272	HORVU3Hr1G113170	ibsc
3H	687951817	687957481	HORVU3Hr1G113200	ibsc
3H	688041803	688084440	HORVU3Hr1G113210	ibsc
3H	688131315	688132828	HORVU3Hr1G113250	ibsc
3H	688184703	688185869	HORVU3Hr1G113280	ibsc
3H	688203497	688206012	HORVU3Hr1G113290	ibsc
3H	688230724	688233179	HORVU3Hr1G113300	ibsc
3H	688372688	688376902	HORVU3Hr1G113340	ibsc
3H	688377855	688381548	HORVU3Hr1G113360	ibsc
3H	688381610	688381853	ENSRNA049488067	RNase_MRP
3H	688394242	688396263	HORVU3Hr1G113410	ibsc
3H	688445561	688446250	HORVU3Hr1G113420	ibsc
3H	688446890	688449490	HORVU3Hr1G113430	ibsc
3H	688453193	688454597	HORVU3Hr1G113440	ibsc
3H	688500045	688501255	HORVU3Hr1G113450	ibsc
3H	688507550	688507660	ENSRNA049488073	Plant_U3
3H	688595475	688596223	HORVU3Hr1G113490	ibsc
3H	688621567	688621959	HORVU3Hr1G113520	ibsc
3H	688689785	688692621	HORVU3Hr1G113530	ibsc
3H	688701343	688702769	HORVU3Hr1G113540	ibsc
3H	688701495	688710081	HORVU3Hr1G113550	ibsc
3H	688723409	688724697	HORVU3Hr1G113560	ibsc
3H	688730445	688731235	HORVU3Hr1G113570	ibsc
3H	688743970	688744344	HORVU3Hr1G113590	ibsc
3H	688760447	688760839	HORVU3Hr1G113600	ibsc
3H	688775159	688775533	HORVU3Hr1G113610	ibsc
3H	688794127	688795251	HORVU3Hr1G113620	ibsc
3H	531052108	531062821	HORVU3Hr1G070150	ibsc
3H	531091549	531092104	HORVU3Hr1G070170	ibsc
3H	531276165	531276407	HORVU3Hr1G070180	ibsc
3H	531276690	531277368	HORVU3Hr1G070190	ibsc
3H	531313974	531318878	HORVU3Hr1G070200	ibsc
3H	531459673	531462776	HORVU3Hr1G070220	ibsc
3H	531625508	531630040	HORVU3Hr1G070240	ibsc
3H	531634504	531636305	HORVU3Hr1G070260	ibsc
3H	531690425	531695683	HORVU3Hr1G070270	ibsc
3H	531719396	531719541	ENSRNA049488424	U2
3H	531770882	531772233	HORVU3Hr1G070290	ibsc
3H	531824729	531831634	HORVU3Hr1G070300	ibsc
3H	531963238	531963492	HORVU3Hr1G070310	ibsc
3H	532169295	532175031	HORVU3Hr1G070340	ibsc
3H	532381117	532395351	HORVU3Hr1G070370	ibsc
3H	532582116	532584082	HORVU3Hr1G070400	ibsc
3H	532629717	532630058	HORVU3Hr1G070420	ibsc
3H	532630850	532632305	HORVU3Hr1G070430	ibsc
3H	532633820	532641121	HORVU3Hr1G070440	ibsc
3H	532634115	532634309	ENSRNA049488423	U2
3H	626221043	626225019	HORVU3Hr1G088860	ibsc
3H	626226464	626227051	HORVU3Hr1G088870	ibsc
3H	626281875	626283823	HORVU3Hr1G088880	ibsc
3H	626284998	626286140	HORVU3Hr1G088890	ibsc
3H	626440655	626448031	HORVU3Hr1G088900	ibsc
3H	626475902	626483338	HORVU3Hr1G088910	ibsc
3H	626505720	626507482	HORVU3Hr1G088940	ibsc
3H	626603244	626605033	HORVU3Hr1G088950	ibsc
3H	626792812	626797930	HORVU3Hr1G088970	ibsc
3H	626799114	626805104	HORVU3Hr1G088980	ibsc
3H	626799239	626802448	HORVU3Hr1G088990	ibsc
3H	626851946	626856120	HORVU3Hr1G089000	ibsc
3H	627055095	627060155	HORVU3Hr1G089020	ibsc
3H	627060430	627063156	HORVU3Hr1G089030	ibsc
3H	627063220	627063293	ENSRNA049435259	tRNA-Ile
3H	627083327	627148340	HORVU3Hr1G089040	ibsc
3H	627146129	627155043	HORVU3Hr1G089060	ibsc
3H	627358986	627366682	HORVU3Hr1G089090	ibsc
3H	627472565	627481767	HORVU3Hr1G089130	ibsc
3H	627490752	627493520	HORVU3Hr1G089140	ibsc
3H	627596446	627597340	HORVU3Hr1G089150	ibsc
3H	627749990	627754917	HORVU3Hr1G089160	ibsc
3H	627756684	627760678	HORVU3Hr1G089170	ibsc
3H	627761237	627767649	HORVU3Hr1G089190	ibsc
3H	627789150	627792971	HORVU3Hr1G089210	ibsc
3H	627874989	627876676	HORVU3Hr1G089250	ibsc
3H	627883522	627887978	HORVU3Hr1G089260	ibsc
3H	628015105	628016247	HORVU3Hr1G089290	ibsc
3H	628030631	628032156	HORVU3Hr1G089300	ibsc
3H	628115642	628125025	HORVU3Hr1G089330	ibsc
3H	628125540	628126774	HORVU3Hr1G089350	ibsc
3H	628164744	628170097	HORVU3Hr1G089360	ibsc
3H	628213036	628215684	HORVU3Hr1G089370	ibsc
3H	628222852	628224487	HORVU3Hr1G089380	ibsc
3H	628276869	628277428	HORVU3Hr1G089410	ibsc
3H	628355427	628356316	HORVU3Hr1G089420	ibsc
3H	628465079	628465480	HORVU3Hr1G089430	ibsc
3H	628523331	628523600	HORVU3Hr1G089440	ibsc
3H	628539793	628547801	HORVU3Hr1G089450	ibsc
3H	628710495	628722343	HORVU3Hr1G089480	ibsc
3H	628756544	628762691	HORVU3Hr1G089490	ibsc
3H	628889265	628890381	HORVU3Hr1G089500	ibsc
3H	628923468	628927818	HORVU3Hr1G089510	ibsc
3H	628930189	628937284	HORVU3Hr1G089520	ibsc
3H	629103777	629106091	HORVU3Hr1G089540	ibsc
3H	629144705	629147406	HORVU3Hr1G089550	ibsc
3H	629148817	629149013	ENSRNA049488473	U2
3H	629148937	629149135	HORVU3Hr1G089570	ibsc
3H	629154015	629157515	HORVU3Hr1G089580	ibsc
3H	629164844	629167239	HORVU3Hr1G089590	ibsc
3H	629185030	629185226	ENSRNA049488474	U2
3H	629185150	629185355	HORVU3Hr1G089600	ibsc
3H	629249798	629250352	HORVU3Hr1G089620	ibsc
3H	629257831	629261447	HORVU3Hr1G089630	ibsc
3H	629276593	629278988	HORVU3Hr1G089640	ibsc
3H	629321677	629326560	HORVU3Hr1G089650	ibsc
3H	629334432	629339341	HORVU3Hr1G089670	ibsc
3H	629338385	629338564	HORVU3Hr1G089680	ibsc
3H	629445057	629449493	HORVU3Hr1G089690	ibsc
3H	629468653	629469496	HORVU3Hr1G089700	ibsc
3H	629573890	629574698	HORVU3Hr1G089710	ibsc
3H	629625302	629625686	HORVU3Hr1G089720	ibsc
3H	629720265	629721322	HORVU3Hr1G089750	ibsc
3H	629934519	629939622	HORVU3Hr1G089760	ibsc
3H	629955127	629960035	HORVU3Hr1G089770	ibsc
3H	629961114	629964056	HORVU3Hr1G089780	ibsc
3H	630037106	630038828	HORVU3Hr1G089820	ibsc
3H	630039618	630043684	HORVU3Hr1G089830	ibsc
3H	630051633	630052297	HORVU3Hr1G089840	ibsc
3H	630092269	630103484	HORVU3Hr1G089850	ibsc
3H	630097928	630098743	HORVU3Hr1G089860	ibsc
3H	630214617	630218642	HORVU3Hr1G089880	ibsc
3H	630296200	630298586	HORVU3Hr1G089910	ibsc
3H	630316488	630321102	HORVU3Hr1G089950	ibsc
3H	630470527	630474396	HORVU3Hr1G089960	ibsc
3H	630481802	630484533	HORVU3Hr1G089970	ibsc
3H	630544689	630548197	HORVU3Hr1G089980	GA20ox3
3H	630555909	630558734	HORVU3Hr1G089990	ibsc
3H	630627225	630633720	HORVU3Hr1G090000	ibsc
3H	630642811	630646198	HORVU3Hr1G090030	ibsc
3H	630677524	630678276	HORVU3Hr1G090040	ibsc
3H	630678526	630687752	HORVU3Hr1G090050	ibsc
3H	630738144	630741486	HORVU3Hr1G090080	ibsc
3H	630742281	630746150	HORVU3Hr1G090090	ibsc
3H	630773974	630775385	HORVU3Hr1G090110	ibsc
3H	630795215	630796708	HORVU3Hr1G090120	ibsc
3H	630856538	630869218	HORVU3Hr1G090150	ibsc
3H	630856652	630866489	HORVU3Hr1G090160	ibsc
3H	630873645	630873849	ENSRNA049488403	U2
3H	630875867	630879130	HORVU3Hr1G090170	ibsc
3H	630880156	630883691	HORVU3Hr1G090180	ibsc
3H	630892700	630894156	HORVU3Hr1G090190	ibsc
3H	630929934	630933754	HORVU3Hr1G090220	ibsc
3H	630954287	630955024	HORVU3Hr1G090230	ibsc
3H	631021974	631024918	HORVU3Hr1G090240	ibsc
3H	631051660	631051733	ENSRNA049435234	tRNA-Ile
3H	631054561	631054635	ENSRNA049435220	tRNA-Ile
3H	631057732	631057805	ENSRNA049436403	tRNA-Ile
3H	631065854	631068914	HORVU3Hr1G090250	ibsc
3H	631083376	631083449	ENSRNA049435214	tRNA-Ile
3H	631105686	631105759	ENSRNA049435204	tRNA-Ile
3H	631105870	631105943	ENSRNA049435198	tRNA-Ile
3H	631106359	631111083	HORVU3Hr1G090270	ibsc
3H	631138472	631138808	HORVU3Hr1G090310	ibsc
3H	631271883	631272285	HORVU3Hr1G090320	ibsc
3H	631273435	631273709	HORVU3Hr1G090330	ibsc
3H	631484895	631488034	HORVU3Hr1G090350	ibsc
3H	631488574	631495632	HORVU3Hr1G090360	ibsc
3H	631681028	631681578	HORVU3Hr1G090370	ibsc
3H	631698012	631698880	HORVU3Hr1G090410	ibsc
3H	631701900	631702970	HORVU3Hr1G090430	ibsc
3H	631804086	631808069	HORVU3Hr1G090440	ibsc
3H	631822471	631826803	HORVU3Hr1G090450	ibsc
3H	631825218	631830515	HORVU3Hr1G090460	ibsc
3H	631852571	631853026	HORVU3Hr1G090470	ibsc
3H	632241618	632252806	HORVU3Hr1G090530	ibsc
3H	632242327	632247481	HORVU3Hr1G090540	ibsc
3H	632250577	632254319	HORVU3Hr1G090560	ibsc
3H	632316922	632321810	HORVU3Hr1G090580	ibsc
3H	632327995	632329238	HORVU3Hr1G090600	ibsc
3H	632411157	632411671	HORVU3Hr1G090610	ibsc
3H	632444559	632445065	HORVU3Hr1G090620	ibsc
3H	632570545	632570754	HORVU3Hr1G090650	ibsc
3H	632901689	632906941	HORVU3Hr1G090670	ibsc
3H	632908563	632911499	HORVU3Hr1G090690	ibsc
3H	632911851	632917632	HORVU3Hr1G090710	ibsc
3H	633066505	633069310	HORVU3Hr1G090730	ibsc
3H	240476903	240477073	HORVU3Hr1G040200	ibsc
3H	240478042	240478212	HORVU3Hr1G040210	ibsc
3H	241474823	241478661	HORVU3Hr1G040230	ibsc
3H	241713184	241714004	HORVU3Hr1G040260	ibsc
3H	241775085	241780591	HORVU3Hr1G040270	ibsc
3H	241800735	241801168	HORVU3Hr1G040280	ibsc
3H	241860812	241864638	HORVU3Hr1G040290	ibsc
3H	241926356	241927063	HORVU3Hr1G040300	ibsc
3H	242518959	242524830	HORVU3Hr1G040310	ibsc
3H	244048158	244055241	HORVU3Hr1G040350	ibsc
3H	244136880	244329433	HORVU3Hr1G040360	ibsc
3H	244246920	244248034	HORVU3Hr1G040400	ibsc
3H	245038947	245039441	HORVU3Hr1G040410	ibsc
3H	245083227	245086831	HORVU3Hr1G040420	ibsc
3H	245389951	245390514	HORVU3Hr1G040470	ibsc
3H	245758879	245759118	HORVU3Hr1G040500	ibsc
3H	245865398	245865670	HORVU3Hr1G040520	ibsc
3H	246957330	246967525	HORVU3Hr1G040580	ibsc
3H	247038030	247041549	HORVU3Hr1G040590	ibsc
3H	247373625	247400355	HORVU3Hr1G040640	ibsc
3H	247787453	247787799	HORVU3Hr1G040680	ibsc
3H	249669757	249673206	HORVU3Hr1G040710	ibsc
3H	249678740	249684287	HORVU3Hr1G040720	ibsc
3H	250478368	250480407	HORVU3Hr1G040740	ibsc
3H	250479887	250480261	HORVU3Hr1G040750	ibsc
3H	251421894	251422280	HORVU3Hr1G040780	ibsc
3H	251506106	251506492	HORVU3Hr1G040790	ibsc
3H	252302075	252303270	HORVU3Hr1G040840	ibsc
3H	252304039	252304761	HORVU3Hr1G040850	ibsc
3H	252661749	252663167	HORVU3Hr1G040870	ibsc
3H	252840590	252845989	HORVU3Hr1G040880	ibsc
3H	253029655	253029825	HORVU3Hr1G040900	ibsc
3H	253540459	253540721	HORVU3Hr1G040910	ibsc
3H	253810949	253813091	HORVU3Hr1G040920	ibsc
3H	254122060	254122607	HORVU3Hr1G040980	ibsc
3H	254456729	254460078	HORVU3Hr1G040990	ibsc
3H	254832970	254843549	HORVU3Hr1G041030	ibsc
3H	254867486	254869970	HORVU3Hr1G041070	ibsc
3H	254873191	254873373	HORVU3Hr1G041090	ibsc
3H	254875122	254875377	HORVU3Hr1G041110	ibsc
3H	255682411	255682931	HORVU3Hr1G041130	ibsc
3H	256194419	256233445	HORVU3Hr1G041160	ibsc
3H	256211923	256212132	HORVU3Hr1G041190	ibsc
3H	256215603	256215935	HORVU3Hr1G041230	ibsc
3H	256251311	256281939	HORVU3Hr1G041250	ibsc
3H	256439317	256439505	HORVU3Hr1G041290	ibsc
3H	256450867	256451333	HORVU3Hr1G041310	ibsc
3H	256567114	256568213	HORVU3Hr1G041330	ibsc
3H	256572048	256572721	HORVU3Hr1G041370	ibsc
3H	256897828	256903518	HORVU3Hr1G041400	ibsc
3H	256959596	256961836	HORVU3Hr1G041430	ibsc
3H	258119732	258123019	HORVU3Hr1G041440	ibsc
3H	259759283	259761294	HORVU3Hr1G041520	ibsc
3H	260272034	260285532	HORVU3Hr1G041560	ibsc
3H	260285664	260288757	HORVU3Hr1G041600	ibsc
3H	260639474	260639707	HORVU3Hr1G041620	ibsc
3H	260640265	260640414	HORVU3Hr1G041630	ibsc
3H	260673495	260698557	HORVU3Hr1G041640	ibsc
3H	260679572	260680203	HORVU3Hr1G041680	ibsc
3H	260686262	260686385	HORVU3Hr1G041730	ibsc
3H	260881974	260886288	HORVU3Hr1G041760	ibsc
3H	261009541	261028057	HORVU3Hr1G041810	ibsc
3H	261022546	261028057	HORVU3Hr1G041820	ibsc
3H	261970668	261976284	HORVU3Hr1G041850	ibsc
3H	262891519	262892158	HORVU3Hr1G041870	ibsc
3H	263724833	263746170	HORVU3Hr1G041900	ibsc
3H	264936592	264952027	HORVU3Hr1G041990	ibsc
3H	265281680	265281774	ENSRNA049488457	snoZ103
3H	265282655	265283204	HORVU3Hr1G042050	ibsc
3H	265284253	265284513	HORVU3Hr1G042060	ibsc
3H	266681520	266682064	HORVU3Hr1G042110	ibsc
3H	267285420	267302003	HORVU3Hr1G042140	ibsc
3H	267761280	267761524	HORVU3Hr1G042280	ibsc
3H	268461072	268473269	HORVU3Hr1G042290	ibsc
3H	268791663	268793569	HORVU3Hr1G042320	ibsc
3H	268906906	268955150	HORVU3Hr1G042330	ibsc
3H	268935129	268935839	HORVU3Hr1G042400	ibsc
3H	269272858	269328719	HORVU3Hr1G042440	ibsc
3H	269929071	269963305	HORVU3Hr1G042500	ibsc
3H	269956827	269957219	HORVU3Hr1G042520	ibsc
3H	270264122	270269601	HORVU3Hr1G042540	ibsc
3H	270438168	270564380	HORVU3Hr1G042600	ibsc
3H	271430306	271430785	HORVU3Hr1G042670	ibsc
3H	271527268	271564536	HORVU3Hr1G042680	ibsc
3H	271539663	271539896	HORVU3Hr1G042690	ibsc
3H	271757175	271770306	HORVU3Hr1G042770	ibsc
3H	272679312	272698566	HORVU3Hr1G042790	ibsc
3H	272789033	272794379	HORVU3Hr1G042830	ibsc
3H	272797256	272797650	HORVU3Hr1G042840	ibsc
3H	273462159	273470735	HORVU3Hr1G042890	ibsc
3H	274853155	274873957	HORVU3Hr1G042920	ibsc
3H	274863478	274865190	HORVU3Hr1G042930	ibsc
3H	275846137	275847984	HORVU3Hr1G042970	ibsc
3H	277378596	277378841	HORVU3Hr1G043030	ibsc
3H	277378851	277379126	HORVU3Hr1G043040	ibsc
3H	277383351	277383524	HORVU3Hr1G043070	ibsc
3H	277520579	277523061	HORVU3Hr1G043090	ibsc
3H	277969767	277969961	HORVU3Hr1G043110	ibsc
3H	277973584	277973792	HORVU3Hr1G043140	ibsc
3H	278254855	278256665	HORVU3Hr1G043160	ibsc
3H	278497665	278497889	HORVU3Hr1G043210	ibsc
3H	278884489	278886376	HORVU3Hr1G043250	ibsc
3H	279060588	279078489	HORVU3Hr1G043300	ibsc
3H	279070931	279073081	HORVU3Hr1G043310	ibsc
3H	279073459	279074960	HORVU3Hr1G043320	ibsc
3H	279470600	279470770	HORVU3Hr1G043350	ibsc
3H	279755871	279759438	HORVU3Hr1G043380	ibsc
3H	280115534	280144231	HORVU3Hr1G043390	ibsc
3H	280310298	280339871	HORVU3Hr1G043440	ibsc
3H	280313476	280313685	HORVU3Hr1G043460	ibsc
3H	280495354	280501135	HORVU3Hr1G043510	ibsc
3H	280711035	280766862	HORVU3Hr1G043530	ibsc
3H	280759112	280759255	HORVU3Hr1G043560	ibsc
3H	281796068	281796918	HORVU3Hr1G043600	ibsc
3H	281858679	281880965	HORVU3Hr1G043640	ibsc
3H	281876545	281878355	HORVU3Hr1G043660	ibsc
3H	281902898	281905169	HORVU3Hr1G043690	ibsc
3H	282624697	282648576	HORVU3Hr1G043730	ibsc
3H	283265910	283328168	HORVU3Hr1G043800	ibsc
3H	283486966	283488520	HORVU3Hr1G043840	ibsc
3H	284373017	284374163	HORVU3Hr1G043860	ibsc
3H	284475828	284476251	HORVU3Hr1G043870	ibsc
3H	284718272	284752061	HORVU3Hr1G043930	ibsc
3H	284723787	284724305	HORVU3Hr1G043960	ibsc
3H	285086431	285086703	HORVU3Hr1G044100	ibsc
3H	285087072	285087364	HORVU3Hr1G044110	ibsc
3H	285090425	285090820	HORVU3Hr1G044130	ibsc
3H	285091352	285091738	HORVU3Hr1G044140	ibsc
3H	285092827	285101715	HORVU3Hr1G044150	ibsc
3H	285097341	285097716	HORVU3Hr1G044170	ibsc
3H	37185065	37186665	HORVU3Hr1G015710	ibsc
3H	37270909	37272720	HORVU3Hr1G015730	ibsc
3H	37279435	37282952	HORVU3Hr1G015740	ibsc
3H	37301453	37307906	HORVU3Hr1G015760	ibsc
3H	37357039	37358505	HORVU3Hr1G015770	ibsc
3H	37365611	37367122	HORVU3Hr1G015780	ibsc
3H	37421442	37431420	HORVU3Hr1G015800	ibsc
3H	37439067	37440194	HORVU3Hr1G015810	ibsc
3H	37448315	37448512	HORVU3Hr1G015820	ibsc
3H	37462564	37462770	HORVU3Hr1G015830	ibsc
3H	37467161	37469775	HORVU3Hr1G015840	ibsc
3H	599167611	599168954	HORVU3Hr1G082520	ibsc
3H	599315047	599316525	HORVU3Hr1G082540	ibsc
3H	599354450	599360691	HORVU3Hr1G082550	ibsc
3H	599464171	599468692	HORVU3Hr1G082580	ibsc
3H	599551266	599557771	HORVU3Hr1G082590	ibsc
3H	599755985	599757680	HORVU3Hr1G082610	ibsc
3H	599765873	599772914	HORVU3Hr1G082620	ibsc
3H	599859304	599860424	HORVU3Hr1G082640	ibsc
3H	600004784	600010257	HORVU3Hr1G082670	ibsc
3H	600013902	600018673	HORVU3Hr1G082690	ibsc
3H	600252132	600253966	HORVU3Hr1G082700	ibsc
3H	600255785	600256271	HORVU3Hr1G082710	ibsc
3H	600262542	600275064	HORVU3Hr1G082730	ibsc
3H	600275457	600278158	HORVU3Hr1G082740	ibsc
3H	600342268	600342339	ENSRNA049435482	tRNA-Gln
3H	600343304	600364584	HORVU3Hr1G082750	ibsc
3H	600346439	600346510	ENSRNA049435461	tRNA-Gln
3H	600354029	600354100	ENSRNA049435444	tRNA-Gln
3H	600357255	600357326	ENSRNA049435419	tRNA-Gln
3H	600365009	600368140	HORVU3Hr1G082780	ibsc
3H	600371184	600371762	HORVU3Hr1G082790	ibsc
3H	600378317	600380014	HORVU3Hr1G082800	ibsc
3H	600416083	600416420	HORVU3Hr1G082810	ibsc
3H	600418568	600418639	ENSRNA049910382	tRNA-Gln
3H	600625648	600626511	HORVU3Hr1G082840	ibsc
3H	600647193	600671726	HORVU3Hr1G082850	ibsc
3H	600671309	600676620	HORVU3Hr1G082870	ibsc
3H	600686971	600689235	HORVU3Hr1G082880	ibsc
3H	600744498	600744650	HORVU3Hr1G082890	ibsc
3H	600878112	600891104	HORVU3Hr1G082900	ibsc
3H	600894532	600896798	HORVU3Hr1G082920	ibsc
3H	600899459	600909538	HORVU3Hr1G082930	ibsc
3H	600993842	600993913	ENSRNA049435399	tRNA-Gln
3H	600994705	600996274	HORVU3Hr1G082940	ibsc
3H	601009000	601011105	HORVU3Hr1G082980	ibsc
3H	601017194	601017265	ENSRNA049436197	tRNA-Gln
3H	601021862	601021933	ENSRNA049436214	tRNA-Gln
3H	601138539	601155515	HORVU3Hr1G083020	ibsc
3H	601140977	601141048	ENSRNA049435387	tRNA-Gln
3H	601145644	601145715	ENSRNA049435359	tRNA-Gln
3H	601152882	601152953	ENSRNA049435330	tRNA-Gln
3H	601470215	601474659	HORVU3Hr1G083090	ibsc
3H	601475494	601480058	HORVU3Hr1G083110	ibsc
3H	601705708	601710037	HORVU3Hr1G083150	ibsc
3H	601815805	601817335	HORVU3Hr1G083160	ibsc
3H	602089588	602094803	HORVU3Hr1G083180	ibsc
3H	602252906	602254385	HORVU3Hr1G083190	ibsc
3H	602375720	602387137	HORVU3Hr1G083200	ibsc
3H	602417368	602418032	HORVU3Hr1G083230	ibsc
3H	602640638	602644380	HORVU3Hr1G083250	ibsc
3H	602640644	602648554	HORVU3Hr1G083260	ibsc
3H	602659829	602660254	HORVU3Hr1G083280	ibsc
3H	602734953	602738490	HORVU3Hr1G083290	ibsc
3H	602773272	602776454	HORVU3Hr1G083300	ibsc
3H	602776782	602777889	HORVU3Hr1G083310	ibsc
3H	602829537	602830073	HORVU3Hr1G083320	ibsc
3H	602895358	602902843	HORVU3Hr1G083330	ibsc
3H	602898724	602899041	HORVU3Hr1G083340	ibsc
3H	603058488	603257435	HORVU3Hr1G083350	ibsc
3H	603091366	603094015	HORVU3Hr1G083360	ibsc
3H	603108010	603110609	HORVU3Hr1G083370	ibsc
4H	414772	418306	HORVU4Hr1G000220	ibsc
4H	419978	422167	HORVU4Hr1G000230	ibsc
4H	579890	581987	HORVU4Hr1G000240	ibsc
4H	583661	586853	HORVU4Hr1G000250	ibsc
4H	629733	642655	HORVU4Hr1G000280	ibsc
4H	643618	648074	HORVU4Hr1G000290	ibsc
4H	658500	665188	HORVU4Hr1G000310	ibsc
4H	675526	718067	HORVU4Hr1G000350	ibsc
4H	694311	696601	HORVU4Hr1G000410	ibsc
4H	697239	718222	HORVU4Hr1G000420	ibsc
4H	721750	723458	HORVU4Hr1G000490	ibsc
4H	735998	738078	HORVU4Hr1G000510	ibsc
4H	739843	743253	HORVU4Hr1G000520	ibsc
4H	856951	857338	HORVU4Hr1G000540	ibsc
4H	860015	860392	HORVU4Hr1G000550	ibsc
4H	979961	1053290	HORVU4Hr1G000560	ibsc
4H	1086114	1089591	HORVU4Hr1G000580	ibsc
4H	1086126	1093269	HORVU4Hr1G000590	ibsc
4H	1094178	1096628	HORVU4Hr1G000610	ibsc
4H	1100187	1104779	HORVU4Hr1G000620	ibsc
4H	1116900	1118172	HORVU4Hr1G000630	ibsc
4H	1118767	1122596	HORVU4Hr1G000640	ibsc
4H	1128893	1132912	HORVU4Hr1G000650	ibsc
4H	1139723	1146439	HORVU4Hr1G000660	ibsc
4H	1139723	1146539	HORVU4Hr1G000670	ibsc
4H	1206549	1208197	HORVU4Hr1G000700	ibsc
4H	1219096	1247021	HORVU4Hr1G000710	ibsc
4H	1226596	1229831	HORVU4Hr1G000730	ibsc
4H	1247671	1249165	HORVU4Hr1G000740	ibsc
4H	1257195	1258183	HORVU4Hr1G000750	ibsc
4H	1261512	1264915	HORVU4Hr1G000770	ibsc
4H	1273093	1275994	HORVU4Hr1G000780	ibsc
4H	1285274	1287619	HORVU4Hr1G000810	ibsc
4H	1290078	1292388	HORVU4Hr1G000830	ibsc
4H	1295553	1296068	HORVU4Hr1G000840	ibsc
4H	1301221	1303023	HORVU4Hr1G000850	ibsc
4H	1309315	1311258	HORVU4Hr1G000870	ibsc
4H	1331647	1333389	HORVU4Hr1G000880	ibsc
4H	1335607	1337029	HORVU4Hr1G000910	ibsc
4H	1337583	1339332	HORVU4Hr1G000920	ibsc
4H	1339813	1341744	HORVU4Hr1G000930	ibsc
4H	1343772	1346934	HORVU4Hr1G000940	ibsc
4H	1351880	1353927	HORVU4Hr1G000950	ibsc
4H	1356682	1357123	HORVU4Hr1G000960	ibsc
4H	1616933	1617055	HORVU4Hr1G000980	ibsc
4H	1643928	1648642	HORVU4Hr1G000990	ibsc
4H	1740102	1754339	HORVU4Hr1G001040	ibsc
4H	1754658	1758219	HORVU4Hr1G001060	ibsc
4H	1764013	1784829	HORVU4Hr1G001070	ibsc
4H	1768869	1770068	HORVU4Hr1G001080	ibsc
4H	1770155	1770944	HORVU4Hr1G001090	ibsc
4H	1783175	1785027	HORVU4Hr1G001130	ibsc
4H	1785675	1788100	HORVU4Hr1G001140	ibsc
4H	1788038	1788109	ENSRNA049444865	tRNA-Pro
4H	1790115	1790186	ENSRNA049444873	tRNA-Pro
4H	1791488	1792119	HORVU4Hr1G001170	ibsc
4H	1792410	1792529	ENSRNA049459487	snoR86
4H	1792585	1792703	ENSRNA049459499	snoR86
4H	1792786	1792904	ENSRNA049459512	snoR86
4H	1792981	1793098	ENSRNA049459535	snoR86
4H	1793177	1793295	ENSRNA049459548	snoR86
4H	1793372	1793464	ENSRNA049459525	snoZ266
4H	1797033	1797846	HORVU4Hr1G001190	ibsc
4H	1798966	1799616	HORVU4Hr1G001200	ibsc
4H	1802792	1803421	HORVU4Hr1G001210	ibsc
4H	1807975	1814801	HORVU4Hr1G001220	ibsc
4H	1927451	1928793	HORVU4Hr1G001250	ibsc
4H	1952799	1954054	HORVU4Hr1G001340	ibsc
4H	2022695	2031852	HORVU4Hr1G001350	ibsc
4H	2063566	2066437	HORVU4Hr1G001380	ibsc
4H	2187885	2188325	HORVU4Hr1G001400	ibsc
4H	2207770	2209208	HORVU4Hr1G001410	ibsc
4H	2254784	2259841	HORVU4Hr1G001420	ibsc
4H	2254894	2264900	HORVU4Hr1G001430	ibsc
4H	2271467	2275680	HORVU4Hr1G001450	ibsc
4H	2313548	2316423	HORVU4Hr1G001470	ibsc
4H	2438344	2440227	HORVU4Hr1G001480	ibsc
4H	2456544	2458151	HORVU4Hr1G001490	ibsc
4H	2483967	2485502	HORVU4Hr1G001500	ibsc
4H	2521211	2526348	HORVU4Hr1G001510	ibsc
4H	2563517	2565773	HORVU4Hr1G001540	ibsc
4H	2593937	2596445	HORVU4Hr1G001550	ibsc
4H	2596937	2599674	HORVU4Hr1G001560	ibsc
4H	2618975	2624622	HORVU4Hr1G001570	ibsc
4H	2621198	2621870	HORVU4Hr1G001580	ibsc
4H	2628999	2715020	HORVU4Hr1G001590	ibsc
4H	2665663	2667532	HORVU4Hr1G001610	ibsc
4H	2743905	2746144	HORVU4Hr1G001650	ibsc
4H	2747420	2750638	HORVU4Hr1G001660	ibsc
4H	2753206	2754841	HORVU4Hr1G001670	ibsc
4H	2758625	2761768	HORVU4Hr1G001680	ibsc
4H	2777561	2780134	HORVU4Hr1G001700	ibsc
4H	2787310	2796391	HORVU4Hr1G001710	ibsc
4H	2797513	2800599	HORVU4Hr1G001720	ibsc
4H	2800854	2801615	HORVU4Hr1G001740	ibsc
4H	2806940	2808766	HORVU4Hr1G001770	ibsc
4H	2815398	2818237	HORVU4Hr1G001790	ibsc
4H	2897343	2899502	HORVU4Hr1G001800	ibsc
4H	3006897	3007247	HORVU4Hr1G001810	ibsc
4H	3149196	3155383	HORVU4Hr1G001840	ibsc
4H	3156611	3163911	HORVU4Hr1G001850	ibsc
4H	3174287	3176917	HORVU4Hr1G001870	ibsc
4H	3192120	3192470	HORVU4Hr1G001880	ibsc
4H	3240531	3343705	HORVU4Hr1G001900	ibsc
4H	3256143	3256274	HORVU4Hr1G001920	ibsc
4H	3264419	3267401	HORVU4Hr1G001960	ibsc
4H	3302566	3304338	HORVU4Hr1G001970	ibsc
4H	3534809	3534931	HORVU4Hr1G001990	ibsc
4H	3571159	3576260	HORVU4Hr1G002010	ibsc
4H	3577534	3582238	HORVU4Hr1G002020	ibsc
4H	3581718	3582871	HORVU4Hr1G002030	ibsc
4H	3587964	3589369	HORVU4Hr1G002040	ibsc
4H	3622791	3625656	HORVU4Hr1G002050	ibsc
4H	3643371	3643442	ENSRNA049445984	tRNA-Pro
4H	3647138	3649035	HORVU4Hr1G002070	HORvu-Pht1-11
4H	3665654	3670291	HORVU4Hr1G002080	ibsc
4H	3673571	3674502	HORVU4Hr1G002090	ibsc
4H	3690573	3693482	HORVU4Hr1G002100	ibsc
4H	3725820	3726374	HORVU4Hr1G002120	ibsc
4H	3727268	3734263	HORVU4Hr1G002130	ibsc
4H	3769527	3772268	HORVU4Hr1G002140	ibsc
4H	3771367	3774465	HORVU4Hr1G002150	ibsc
4H	3822040	3825680	HORVU4Hr1G002160	ibsc
4H	3837595	3842975	HORVU4Hr1G002170	ibsc
4H	3968047	3970356	HORVU4Hr1G002180	ibsc
4H	3989950	3990533	HORVU4Hr1G002200	ibsc
4H	4059707	4063674	HORVU4Hr1G002230	ibsc
4H	4146294	4148001	HORVU4Hr1G002240	ibsc
4H	4178463	4185561	HORVU4Hr1G002250	ibsc
4H	4190962	4197198	HORVU4Hr1G002270	ibsc
4H	4194802	4197705	HORVU4Hr1G002280	ibsc
4H	4203620	4205192	HORVU4Hr1G002290	ibsc
4H	4205894	4208046	HORVU4Hr1G002300	ibsc
4H	4215950	4219211	HORVU4Hr1G002310	ibsc
4H	4230599	4232734	HORVU4Hr1G002320	ibsc
4H	4250996	4251066	ENSRNA049444889	tRNA-Gly
4H	4252444	4255591	HORVU4Hr1G002330	ibsc
4H	4293723	4297598	HORVU4Hr1G002350	ibsc
4H	4311130	4315793	HORVU4Hr1G002360	ibsc
4H	4364224	4365742	HORVU4Hr1G002390	ibsc
4H	4367593	4372584	HORVU4Hr1G002400	ibsc
4H	4759652	4765032	HORVU4Hr1G002440	ibsc
4H	4778106	4784175	HORVU4Hr1G002460	ibsc
4H	4786468	4790132	HORVU4Hr1G002480	ibsc
4H	4802421	4805961	HORVU4Hr1G002500	ibsc
4H	4849759	4853111	HORVU4Hr1G002510	ibsc
4H	4852471	4853085	HORVU4Hr1G002520	ibsc
4H	4892452	4896405	HORVU4Hr1G002530	ibsc
4H	4926302	4928913	HORVU4Hr1G002540	ibsc
4H	4933347	4933640	HORVU4Hr1G002550	ibsc
4H	4952290	4953141	HORVU4Hr1G002570	ibsc
4H	4984005	4984937	HORVU4Hr1G002600	ibsc
4H	5017279	5017857	HORVU4Hr1G002630	ibsc
4H	5066553	5067560	HORVU4Hr1G002640	ibsc
4H	5071114	5074962	HORVU4Hr1G002650	ibsc
4H	5132298	5133814	HORVU4Hr1G002670	ibsc
4H	5260081	5264166	HORVU4Hr1G002700	ibsc
4H	5264250	5265528	HORVU4Hr1G002710	ibsc
4H	5270209	5277419	HORVU4Hr1G002720	ibsc
4H	5271171	5276954	HORVU4Hr1G002730	ibsc
4H	5278528	5279768	HORVU4Hr1G002760	ibsc
4H	5283030	5285262	HORVU4Hr1G002770	ibsc
4H	5321736	5324281	HORVU4Hr1G002780	ibsc
4H	5326229	5328720	HORVU4Hr1G002800	Beg1
4H	5368781	5373932	HORVU4Hr1G002820	ibsc
4H	5380148	5380507	HORVU4Hr1G002840	ibsc
4H	5387814	5388360	HORVU4Hr1G002850	ibsc
4H	5425052	5429408	HORVU4Hr1G002870	ibsc
4H	5429838	5435527	HORVU4Hr1G002880	ibsc
4H	5465434	5468850	HORVU4Hr1G002890	ibsc
4H	5470842	5473006	HORVU4Hr1G002900	ibsc
4H	5525417	5526476	HORVU4Hr1G002920	ibsc
4H	5967485	5969733	HORVU4Hr1G002970	ibsc
4H	5999210	6003671	HORVU4Hr1G002980	ibsc
4H	6003981	6007998	HORVU4Hr1G002990	ibsc
4H	6019528	6020121	HORVU4Hr1G003010	ibsc
4H	6021457	6025575	HORVU4Hr1G003040	ibsc
4H	6043718	6046790	HORVU4Hr1G003050	ibsc
4H	6124462	6133126	HORVU4Hr1G003060	ibsc
4H	6137562	6137633	ENSRNA049444896	tRNA-Gln
4H	6140597	6140669	ENSRNA049445975	tRNA-Arg
4H	6141511	6144743	HORVU4Hr1G003080	ibsc
4H	6162124	6207845	HORVU4Hr1G003090	ibsc
4H	6217414	6225665	HORVU4Hr1G003100	ibsc
4H	6227028	6233027	HORVU4Hr1G003110	ibsc
4H	6231239	6238113	HORVU4Hr1G003120	ibsc
4H	6250195	6252140	HORVU4Hr1G003180	ibsc
4H	6260930	6273949	HORVU4Hr1G003190	ibsc
4H	6300163	6300234	ENSRNA049444913	tRNA-Gln
4H	6303198	6303270	ENSRNA049445968	tRNA-Arg
4H	6344489	6347621	HORVU4Hr1G003210	ibsc
4H	6470635	6474160	HORVU4Hr1G003220	ibsc
4H	6480903	6482139	HORVU4Hr1G003230	ibsc
4H	6494440	6496561	HORVU4Hr1G003250	ibsc
4H	6497373	6500937	HORVU4Hr1G003270	ibsc
4H	6509501	6514179	HORVU4Hr1G003290	ibsc
4H	6524566	6525243	HORVU4Hr1G003320	ibsc
4H	6525704	6526426	HORVU4Hr1G003330	ibsc
4H	6534580	6536915	HORVU4Hr1G003340	ibsc
4H	6859278	6859996	HORVU4Hr1G003350	ibsc
4H	7065106	7081674	HORVU4Hr1G003360	ibsc
4H	7159111	7160037	HORVU4Hr1G003400	ibsc
4H	7201167	7205777	HORVU4Hr1G003410	ibsc
4H	7399986	7409174	HORVU4Hr1G003420	ibsc
4H	7419845	7425574	HORVU4Hr1G003430	ibsc
4H	7582838	7589219	HORVU4Hr1G003440	ibsc
4H	7592417	7593590	HORVU4Hr1G003450	ibsc
4H	7603622	7605081	HORVU4Hr1G003460	ibsc
4H	7627198	7628006	HORVU4Hr1G003470	ibsc
4H	7639300	7640178	HORVU4Hr1G003480	ibsc
4H	7707919	7708441	HORVU4Hr1G003520	ibsc
4H	7738052	7739523	HORVU4Hr1G003540	ibsc
4H	7741768	7743289	HORVU4Hr1G003550	ibsc
4H	7743565	7745762	HORVU4Hr1G003570	ibsc
4H	7841505	7849687	HORVU4Hr1G003580	ibsc
4H	7860327	7861766	HORVU4Hr1G003590	ibsc
4H	7870080	7872450	HORVU4Hr1G003600	ibsc
4H	7876797	7879167	HORVU4Hr1G003610	ibsc
4H	7922586	7928580	HORVU4Hr1G003640	ibsc
4H	7966665	7971989	HORVU4Hr1G003650	ibsc
4H	7990430	7999422	HORVU4Hr1G003660	ibsc
4H	7992163	7992462	HORVU4Hr1G003670	ibsc
4H	8008862	8011551	HORVU4Hr1G003680	ibsc
4H	8141215	8144509	HORVU4Hr1G003700	ibsc
4H	8208603	8210453	HORVU4Hr1G003750	ibsc
4H	8211638	8213194	HORVU4Hr1G003760	ibsc
4H	8225562	8228358	HORVU4Hr1G003770	ibsc
4H	8626977	8633020	HORVU4Hr1G003800	ibsc
4H	8666129	8666799	HORVU4Hr1G003810	ibsc
4H	8675210	8679606	HORVU4Hr1G003820	ibsc
4H	8686381	8710980	HORVU4Hr1G003840	ibsc
4H	8718768	8723079	HORVU4Hr1G003890	ibsc
4H	8746426	8749248	HORVU4Hr1G003910	ibsc
4H	8808440	8815115	HORVU4Hr1G003930	ibsc
4H	8815385	8824248	HORVU4Hr1G003940	ibsc
4H	8851894	8852619	HORVU4Hr1G003970	ibsc
4H	8853791	8858811	HORVU4Hr1G003990	ibsc
4H	8861124	8863971	HORVU4Hr1G004000	ibsc
4H	8886857	8892950	HORVU4Hr1G004010	ibsc
4H	8960751	8961628	HORVU4Hr1G004020	ibsc
4H	8972435	8981437	HORVU4Hr1G004030	ibsc
4H	9060913	9063638	HORVU4Hr1G004040	ibsc
4H	9112207	9113541	HORVU4Hr1G004050	ibsc
4H	9415930	9416931	HORVU4Hr1G004070	ibsc
4H	9416928	9421202	HORVU4Hr1G004080	ibsc
4H	9446389	9456351	HORVU4Hr1G004090	ibsc
4H	9456469	9460089	HORVU4Hr1G004100	ibsc
4H	9468248	9474511	HORVU4Hr1G004120	ibsc
4H	9475096	9478328	HORVU4Hr1G004130	ibsc
4H	9479200	9486348	HORVU4Hr1G004150	ibsc
4H	9575415	9582803	HORVU4Hr1G004160	ibsc
4H	9577602	9579824	HORVU4Hr1G004170	ibsc
4H	9657170	9660231	HORVU4Hr1G004210	ibsc
4H	9697941	9709725	HORVU4Hr1G004230	ibsc
4H	9727736	9731305	HORVU4Hr1G004240	ibsc
4H	9727938	9728252	HORVU4Hr1G004250	ibsc
4H	9733321	9737530	HORVU4Hr1G004260	ibsc
4H	9754912	9760219	HORVU4Hr1G004270	ibsc
4H	9773997	9779733	HORVU4Hr1G004280	ibsc
4H	9796352	9797661	HORVU4Hr1G004290	ibsc
4H	9800922	9801820	HORVU4Hr1G004300	ibsc
4H	9823263	9823703	HORVU4Hr1G004350	ibsc
4H	9832772	9834210	HORVU4Hr1G004380	ibsc
4H	9847970	9848851	HORVU4Hr1G004390	ibsc
4H	9959609	10046586	HORVU4Hr1G004410	ibsc
4H	9994712	10002483	HORVU4Hr1G004440	ibsc
4H	10014359	10025200	HORVU4Hr1G004460	ibsc
4H	10019323	10025838	HORVU4Hr1G004470	ibsc
4H	10041369	10043999	HORVU4Hr1G004520	ibsc
4H	10104375	10108114	HORVU4Hr1G004540	ibsc
4H	10110833	10111517	HORVU4Hr1G004550	ibsc
4H	10160434	10194789	HORVU4Hr1G004590	ibsc
4H	10165497	10166464	HORVU4Hr1G004600	ibsc
4H	10166681	10166972	HORVU4Hr1G004610	ibsc
4H	10490037	10490687	HORVU4Hr1G004690	ibsc
4H	10522879	10527413	HORVU4Hr1G004750	ibsc
4H	10531196	10533954	HORVU4Hr1G004780	ibsc
4H	10547883	10554279	HORVU4Hr1G004800	ibsc
4H	10555439	10562226	HORVU4Hr1G004810	ibsc
4H	10556139	10564976	HORVU4Hr1G004820	ibsc
4H	10594361	10595011	HORVU4Hr1G004860	ibsc
4H	10682222	10684236	HORVU4Hr1G004880	ibsc
4H	10704210	10708712	HORVU4Hr1G004890	ibsc
4H	10737907	10738421	HORVU4Hr1G004900	ibsc
4H	10788262	10789693	HORVU4Hr1G004990	ibsc
4H	10898651	10905209	HORVU4Hr1G005080	ibsc
4H	11044693	11045925	HORVU4Hr1G005090	ibsc
4H	11218969	11302463	HORVU4Hr1G005100	ibsc
4H	11328700	11334559	HORVU4Hr1G005110	ibsc
4H	11335113	11339009	HORVU4Hr1G005140	ibsc
4H	11347318	11352992	HORVU4Hr1G005150	ibsc
4H	11445843	11446037	HORVU4Hr1G005160	ibsc
4H	11448366	11451900	HORVU4Hr1G005180	ibsc
4H	11539832	11545191	HORVU4Hr1G005250	ibsc
4H	11571123	11573546	HORVU4Hr1G005270	ibsc
4H	11610715	11611822	HORVU4Hr1G005290	ibsc
4H	11626617	11631671	HORVU4Hr1G005300	ibsc
4H	11675072	11678750	HORVU4Hr1G005310	ibsc
4H	11769492	11770713	HORVU4Hr1G005320	ibsc
4H	11920685	11921261	HORVU4Hr1G005350	ibsc
4H	11932937	11937799	HORVU4Hr1G005360	ibsc
4H	12238256	12239873	HORVU4Hr1G005370	ibsc
4H	12256558	12258042	HORVU4Hr1G005380	ibsc
4H	12260957	12261202	HORVU4Hr1G005410	ibsc
4H	12269769	12271793	HORVU4Hr1G005440	GER1a
4H	12279931	12284852	HORVU4Hr1G005450	ibsc
4H	12282924	12286833	HORVU4Hr1G005460	ibsc
4H	12436135	12437716	HORVU4Hr1G005480	ibsc
4H	12442244	12444928	HORVU4Hr1G005490	ibsc
4H	12444477	12453588	HORVU4Hr1G005500	ibsc
4H	12449412	12456749	HORVU4Hr1G005510	ibsc
4H	12461057	12465404	HORVU4Hr1G005530	ibsc
4H	12470902	12472023	HORVU4Hr1G005540	ibsc
4H	12527272	12528459	HORVU4Hr1G005560	ibsc
4H	12549380	12551474	HORVU4Hr1G005580	ibsc
4H	12596853	12600983	HORVU4Hr1G005590	ibsc
4H	12602471	12605964	HORVU4Hr1G005600	ibsc
4H	12659895	12660760	HORVU4Hr1G005630	ibsc
4H	13249220	13251466	HORVU4Hr1G005660	ibsc
4H	13299705	13303311	HORVU4Hr1G005670	ibsc
4H	13535155	13536585	HORVU4Hr1G005690	ibsc
4H	13552313	13561773	HORVU4Hr1G005710	ibsc
4H	13576936	13582542	HORVU4Hr1G005730	ibsc
4H	13689296	13808826	HORVU4Hr1G005740	ibsc
4H	13704899	13705283	HORVU4Hr1G005750	ibsc
4H	13707717	13711766	HORVU4Hr1G005770	ibsc
4H	13712456	13716016	HORVU4Hr1G005780	ibsc
4H	13738596	13739607	HORVU4Hr1G005800	ibsc
4H	13745734	13749602	HORVU4Hr1G005810	ibsc
4H	13819148	13823485	HORVU4Hr1G005870	ibsc
4H	13862966	13865310	HORVU4Hr1G005890	ibsc
4H	13912937	13918655	HORVU4Hr1G005900	ibsc
4H	13919042	13921370	HORVU4Hr1G005910	ibsc
4H	14084104	14106618	HORVU4Hr1G005920	LoxB
4H	14171935	14174939	HORVU4Hr1G005940	ibsc
4H	14285544	14295812	HORVU4Hr1G005950	ibsc
4H	14394014	14396296	HORVU4Hr1G005960	ibsc
4H	14396367	14397964	HORVU4Hr1G005970	ibsc
4H	14415890	14417943	HORVU4Hr1G005990	ibsc
4H	14579545	14580983	HORVU4Hr1G006020	ibsc
4H	14589101	14591967	HORVU4Hr1G006070	ibsc
4H	14593026	14596492	HORVU4Hr1G006080	ibsc
4H	14597509	14600465	HORVU4Hr1G006090	ibsc
4H	14605353	14701714	HORVU4Hr1G006100	ibsc
4H	14631333	14632741	HORVU4Hr1G006120	ibsc
4H	14636068	14636525	HORVU4Hr1G006140	ibsc
4H	14656695	14657966	HORVU4Hr1G006160	ibsc
4H	14733348	14739881	HORVU4Hr1G006200	ibsc
4H	14801169	14804331	HORVU4Hr1G006210	ibsc
4H	14811417	14812144	HORVU4Hr1G006250	ibsc
4H	14812210	14817276	HORVU4Hr1G006260	ibsc
4H	14869282	14870395	HORVU4Hr1G006270	ibsc
4H	14950155	14951264	HORVU4Hr1G006280	ibsc
4H	14973852	14978888	HORVU4Hr1G006300	ibsc
4H	14988754	14989871	HORVU4Hr1G006310	ibsc
4H	14989754	14997604	HORVU4Hr1G006320	ibsc
4H	15022368	15022943	HORVU4Hr1G006330	ibsc
4H	15054243	15056343	HORVU4Hr1G006350	ibsc
4H	15100441	15101729	HORVU4Hr1G006370	ibsc
4H	15102251	15102456	HORVU4Hr1G006390	ibsc
4H	15186703	15187076	HORVU4Hr1G006430	ibsc
4H	15234706	15290488	HORVU4Hr1G006450	ibsc
4H	15236120	15238418	HORVU4Hr1G006460	ibsc
4H	15271540	15275739	HORVU4Hr1G006480	ibsc
4H	15275939	15276619	HORVU4Hr1G006490	ibsc
4H	15277224	15279046	HORVU4Hr1G006500	ibsc
4H	15282085	15288070	HORVU4Hr1G006510	ibsc
4H	15293947	15295721	HORVU4Hr1G006520	ibsc
4H	15304130	15308120	HORVU4Hr1G006530	ibsc
4H	15314005	15315030	HORVU4Hr1G006540	ibsc
4H	15377728	15378636	HORVU4Hr1G006620	ibsc
4H	15419487	15425589	HORVU4Hr1G006660	ibsc
4H	15426835	15430534	HORVU4Hr1G006670	ibsc
4H	15505131	15512116	HORVU4Hr1G006710	ibsc
4H	15512479	15521428	HORVU4Hr1G006720	ibsc
4H	15517008	15523943	HORVU4Hr1G006730	ibsc
4H	15524765	15527575	HORVU4Hr1G006740	ibsc
4H	15544613	15553250	HORVU4Hr1G006750	ibsc
4H	15669209	15677845	HORVU4Hr1G006760	ibsc
4H	16018539	16023269	HORVU4Hr1G006780	ibsc
4H	16105279	16107038	HORVU4Hr1G006790	ibsc
4H	16120297	16126140	HORVU4Hr1G006800	ibsc
4H	16154130	16155622	HORVU4Hr1G006820	ibsc
4H	600027670	600031417	HORVU4Hr1G076150	ibsc
4H	600034730	600037977	HORVU4Hr1G076160	ibsc
4H	600127794	600128901	HORVU4Hr1G076170	ibsc
4H	600308834	600313109	HORVU4Hr1G076200	ibsc
4H	600389958	600390491	HORVU4Hr1G076250	ibsc
4H	600409761	600411550	HORVU4Hr1G076260	ibsc
4H	600412698	600413126	HORVU4Hr1G076270	ibsc
4H	600581781	600581976	ENSRNA049484422	U2
4H	600582658	600582853	ENSRNA049484424	U2
4H	600583266	600589698	HORVU4Hr1G076330	ibsc
4H	600596978	600597175	ENSRNA049484420	U2
4H	600614518	600623114	HORVU4Hr1G076350	ibsc
4H	600616023	600617361	HORVU4Hr1G076360	ibsc
4H	600617884	600618644	HORVU4Hr1G076380	ibsc
4H	600635244	600636377	HORVU4Hr1G076420	ibsc
4H	600642704	600646710	HORVU4Hr1G076440	ibsc
4H	600655796	600656302	HORVU4Hr1G076460	ibsc
4H	600665881	600668794	HORVU4Hr1G076470	ibsc
4H	600669732	600670775	HORVU4Hr1G076480	ibsc
4H	600670915	600672921	HORVU4Hr1G076490	ibsc
4H	600738802	600739631	HORVU4Hr1G076510	ibsc
4H	600746173	600750872	HORVU4Hr1G076520	ibsc
4H	601040545	601042044	HORVU4Hr1G076550	ibsc
4H	601100279	601108113	HORVU4Hr1G076570	ibsc
4H	601127275	601128524	HORVU4Hr1G076600	ibsc
4H	601131902	601146306	HORVU4Hr1G076610	ibsc
4H	601138995	601140368	HORVU4Hr1G076620	ibsc
4H	601193766	601196315	HORVU4Hr1G076630	ibsc
4H	601198436	601202586	HORVU4Hr1G076640	ibsc
4H	601211305	601211557	HORVU4Hr1G076660	ibsc
4H	601264514	601265563	HORVU4Hr1G076670	ibsc
4H	601269504	601271105	HORVU4Hr1G076680	ibsc
4H	601370024	601371982	HORVU4Hr1G076690	ibsc
4H	601404510	601406289	HORVU4Hr1G076700	ibsc
4H	601565190	601574894	HORVU4Hr1G076720	ibsc
4H	601593093	601593564	HORVU4Hr1G076740	ibsc
4H	601619974	601621559	HORVU4Hr1G076750	ibsc
4H	601627300	601628348	HORVU4Hr1G076760	ibsc
4H	601704457	601707982	HORVU4Hr1G076770	ibsc
4H	601831094	601831297	HORVU4Hr1G076790	ibsc
4H	601906896	601907985	HORVU4Hr1G076820	ibsc
4H	601929870	601932263	HORVU4Hr1G076840	ibsc
4H	601932188	601935297	HORVU4Hr1G076850	ibsc
4H	601949238	601949726	HORVU4Hr1G076900	ibsc
4H	601966022	601974446	HORVU4Hr1G076910	ibsc
4H	602036645	602040680	HORVU4Hr1G076940	Fdh
4H	602072304	602074955	HORVU4Hr1G076960	ibsc
4H	602075337	602076796	HORVU4Hr1G076970	ibsc
4H	602271418	602276993	HORVU4Hr1G077000	ibsc
4H	602287556	602288431	HORVU4Hr1G077020	ibsc
4H	602294417	602297765	HORVU4Hr1G077030	ibsc
4H	602539423	602540136	HORVU4Hr1G077040	ibsc
4H	602619345	602623662	HORVU4Hr1G077050	ibsc
4H	602624922	602630265	HORVU4Hr1G077060	ibsc
4H	602689567	602694772	HORVU4Hr1G077070	ibsc
4H	602780592	602782960	HORVU4Hr1G077140	ibsc
4H	602825569	602825983	HORVU4Hr1G077160	ibsc
4H	602894171	602897665	HORVU4Hr1G077170	ibsc
4H	602968251	602969512	HORVU4Hr1G077190	ibsc
4H	603024981	603026042	HORVU4Hr1G077200	ibsc
4H	603352485	603377776	HORVU4Hr1G077220	ibsc
4H	603432446	603433455	HORVU4Hr1G077230	ibsc
4H	603597180	603599447	HORVU4Hr1G077240	ibsc
4H	603599889	603603383	HORVU4Hr1G077250	ibsc
4H	603608836	603608943	HORVU4Hr1G077260	ibsc
4H	603622137	603623286	HORVU4Hr1G077280	ibsc
4H	603787515	603788301	HORVU4Hr1G077300	ibsc
4H	603804858	603810939	HORVU4Hr1G077310	ibsc
4H	603976300	603977590	HORVU4Hr1G077350	ibsc
4H	604055532	604057675	HORVU4Hr1G077360	ibsc
4H	604398114	604404689	HORVU4Hr1G077420	ibsc
4H	604404500	604410450	HORVU4Hr1G077430	ibsc
4H	604437775	604444176	HORVU4Hr1G077450	ibsc
4H	604517743	604521274	HORVU4Hr1G077480	ibsc
4H	604659163	604667747	HORVU4Hr1G077500	ibsc
4H	604747329	604752330	HORVU4Hr1G077510	ibsc
4H	604897888	604910615	HORVU4Hr1G077550	ibsc
4H	604911567	604912214	HORVU4Hr1G077570	ibsc
4H	604935987	604943056	HORVU4Hr1G077610	ibsc
4H	604947925	604957358	HORVU4Hr1G077620	ibsc
4H	604951083	604959837	HORVU4Hr1G077630	ibsc
4H	604991951	604998990	HORVU4Hr1G077640	ibsc
4H	605116012	605117026	HORVU4Hr1G077670	ibsc
4H	605124358	605128222	HORVU4Hr1G077680	ibsc
4H	605303615	605305776	HORVU4Hr1G077710	ibsc
4H	605340308	605368564	HORVU4Hr1G077720	ibsc
4H	605359276	605359799	HORVU4Hr1G077730	ibsc
4H	605436546	605436941	HORVU4Hr1G077760	ibsc
4H	605437349	605438768	HORVU4Hr1G077770	ibsc
4H	605450001	605451789	HORVU4Hr1G077780	ibsc
4H	605486888	605488575	HORVU4Hr1G077790	ibsc
4H	605492266	605497222	HORVU4Hr1G077800	ibsc
4H	605540704	605541212	HORVU4Hr1G077830	ibsc
4H	605644071	605649078	HORVU4Hr1G077840	ibsc
4H	605649505	605668683	HORVU4Hr1G077850	ibsc
4H	605786041	605786811	HORVU4Hr1G077870	ibsc
4H	605829122	605830227	HORVU4Hr1G077900	ibsc
4H	605836722	605838046	HORVU4Hr1G077920	ibsc
4H	605845542	605845959	HORVU4Hr1G077930	ibsc
4H	606045616	606053088	HORVU4Hr1G077940	ibsc
4H	606078375	606083206	HORVU4Hr1G077970	ibsc
4H	606165326	606167450	HORVU4Hr1G078010	ibsc
4H	606175825	606178565	HORVU4Hr1G078020	ibsc
4H	606188667	606197781	HORVU4Hr1G078030	ibsc
4H	606225436	606234907	HORVU4Hr1G078050	ibsc
4H	606260868	606261101	HORVU4Hr1G078070	ibsc
4H	606261919	606265491	HORVU4Hr1G078080	ibsc
4H	606349450	606350345	HORVU4Hr1G078100	ibsc
4H	606484486	606487431	HORVU4Hr1G078120	ibsc
4H	606627801	606633930	HORVU4Hr1G078130	ibsc
4H	606660266	606661930	HORVU4Hr1G078150	ibsc
4H	606694568	606694956	HORVU4Hr1G078170	ibsc
4H	606701563	606702484	HORVU4Hr1G078190	ibsc
4H	606747310	606749312	HORVU4Hr1G078210	ibsc
4H	606806989	606807816	HORVU4Hr1G078220	ibsc
4H	606829004	606834019	HORVU4Hr1G078230	ibsc
4H	606834340	606835548	HORVU4Hr1G078250	ibsc
4H	606838358	606840127	HORVU4Hr1G078260	ibsc
4H	607021856	607024644	HORVU4Hr1G078270	ibsc
4H	607157655	607159333	HORVU4Hr1G078310	ibsc
4H	607186081	607186733	HORVU4Hr1G078330	ibsc
4H	607199319	607199681	HORVU4Hr1G078350	ibsc
4H	607206147	607207018	HORVU4Hr1G078380	ibsc
4H	607254355	607255394	HORVU4Hr1G078390	ibsc
4H	607332460	607334210	HORVU4Hr1G078400	ibsc
4H	607441612	607443946	HORVU4Hr1G078410	ibsc
4H	607594771	607595984	HORVU4Hr1G078450	ibsc
4H	607602494	607605035	HORVU4Hr1G078460	ibsc
4H	607622982	607629967	HORVU4Hr1G078470	ibsc
4H	607700879	607701759	HORVU4Hr1G078490	ibsc
4H	607736265	607738105	HORVU4Hr1G078500	ibsc
4H	607739305	607742771	HORVU4Hr1G078510	ibsc
4H	607744729	607745033	ENSRNA049484426	Plant_SRP
4H	607862695	607866879	HORVU4Hr1G078540	ibsc
4H	607919781	607919866	ENSRNA049445649	tRNA-Tyr
4H	607925992	607926077	ENSRNA049445653	tRNA-Tyr
4H	608004520	608006040	HORVU4Hr1G078580	ibsc
4H	608008537	608012340	HORVU4Hr1G078590	ibsc
4H	608048653	608055196	HORVU4Hr1G078610	ibsc
4H	608057045	608065707	HORVU4Hr1G078620	ibsc
4H	608088805	608095323	HORVU4Hr1G078650	ibsc
4H	608110202	608110697	HORVU4Hr1G078660	ibsc
4H	608366493	608366565	ENSRNA049445667	tRNA-Arg
4H	608370056	608377627	HORVU4Hr1G078670	ibsc
4H	608378067	608380902	HORVU4Hr1G078690	ibsc
4H	608378244	608378315	ENSRNA049445192	tRNA-Asp
4H	608407864	608409293	HORVU4Hr1G078700	ibsc
4H	608430426	608435590	HORVU4Hr1G078710	ibsc
4H	608545855	608548864	HORVU4Hr1G078720	ibsc
4H	608851179	608856344	HORVU4Hr1G078750	ibsc
4H	609002595	609004185	HORVU4Hr1G078770	ibsc
4H	609222570	609227227	HORVU4Hr1G078780	ibsc
4H	609237274	609242293	HORVU4Hr1G078800	ibsc
4H	609242210	609247714	HORVU4Hr1G078820	ibsc
4H	609248237	609251008	HORVU4Hr1G078830	ibsc
4H	609311398	609335628	HORVU4Hr1G078840	ibsc
4H	609460792	609465955	HORVU4Hr1G078880	ibsc
4H	609469666	609471968	HORVU4Hr1G078890	ibsc
4H	609471707	609473548	HORVU4Hr1G078900	ibsc
4H	609751289	609753544	HORVU4Hr1G078910	ibsc
4H	609867536	609872982	HORVU4Hr1G078920	ibsc
4H	609894641	609895542	HORVU4Hr1G078950	ibsc
4H	609957949	609959062	HORVU4Hr1G078960	ibsc
4H	609963763	609964110	HORVU4Hr1G078970	ibsc
4H	609966098	609966771	HORVU4Hr1G078980	ibsc
4H	609974781	609976927	HORVU4Hr1G078990	ibsc
4H	609995681	609997877	HORVU4Hr1G079010	ibsc
4H	610162241	610205099	HORVU4Hr1G079020	ibsc
4H	610304724	610309366	HORVU4Hr1G079030	ibsc
4H	610442659	610446537	HORVU4Hr1G079040	ibsc
4H	610809520	610813893	HORVU4Hr1G079050	ibsc
4H	610878336	610880078	HORVU4Hr1G079070	ibsc
4H	610930296	610934429	HORVU4Hr1G079090	ibsc
4H	611031626	611040666	HORVU4Hr1G079100	ibsc
4H	611059544	611062077	HORVU4Hr1G079110	ibsc
4H	611110661	611112871	HORVU4Hr1G079120	ibsc
4H	611122605	611124264	HORVU4Hr1G079130	ibsc
4H	611132359	611132652	HORVU4Hr1G079140	ibsc
4H	611216371	611216442	ENSRNA049445683	tRNA-Pro
4H	611346020	611350289	HORVU4Hr1G079150	ibsc
4H	611364004	611365805	HORVU4Hr1G079160	ibsc
4H	611470870	611473982	HORVU4Hr1G079170	ibsc
4H	611470881	611475710	HORVU4Hr1G079180	ibsc
4H	611478200	611481102	HORVU4Hr1G079190	ibsc
4H	611511116	611512755	HORVU4Hr1G079210	ibsc
4H	611617220	611619921	HORVU4Hr1G079230	ibsc
4H	611627598	611633156	HORVU4Hr1G079250	ibsc
4H	611679942	611682960	HORVU4Hr1G079260	ibsc
4H	611690785	611692599	HORVU4Hr1G079270	ibsc
4H	611781572	611782023	HORVU4Hr1G079280	ibsc
4H	611784489	611784602	HORVU4Hr1G079290	ibsc
4H	611794086	611804953	HORVU4Hr1G079300	ibsc
4H	611811711	611814381	HORVU4Hr1G079310	ibsc
4H	611815171	611818868	HORVU4Hr1G079330	ibsc
4H	611842007	611842681	HORVU4Hr1G079350	ibsc
4H	611846970	611849295	HORVU4Hr1G079360	ibsc
4H	611862338	611862514	HORVU4Hr1G079390	ibsc
4H	612079781	612082649	HORVU4Hr1G079400	ibsc
4H	612083626	612108450	HORVU4Hr1G079420	ibsc
4H	612124937	612125007	ENSRNA049445716	tRNA-Gly
4H	612164418	612167103	HORVU4Hr1G079440	ibsc
4H	612376693	612380761	HORVU4Hr1G079460	ibsc
4H	612596936	612597041	HORVU4Hr1G079480	ibsc
4H	612604512	612615277	HORVU4Hr1G079510	ibsc
4H	612655848	612655918	ENSRNA049445171	tRNA-Gly
4H	612659665	612661826	HORVU4Hr1G079520	ibsc
4H	612750276	612751008	HORVU4Hr1G079570	ibsc
4H	612755426	612756845	HORVU4Hr1G079580	ibsc
4H	612845933	612846721	HORVU4Hr1G079600	ibsc
4H	612875139	612878956	HORVU4Hr1G079610	ibsc
4H	612977167	612979294	HORVU4Hr1G079620	ibsc
4H	613053925	613054630	HORVU4Hr1G079630	ibsc
4H	613198175	613209115	HORVU4Hr1G079710	ibsc
4H	613205845	613208339	HORVU4Hr1G079740	ibsc
4H	613384541	613385534	HORVU4Hr1G079800	ibsc
4H	613389455	613394792	HORVU4Hr1G079820	ibsc
4H	613443863	613452358	HORVU4Hr1G079830	ibsc
4H	613523306	613528175	HORVU4Hr1G079860	ibsc
4H	613637412	613639562	HORVU4Hr1G079880	ibsc
4H	613639588	613642173	HORVU4Hr1G079890	ibsc
4H	613641592	613648256	HORVU4Hr1G079900	ibsc
4H	613652935	613661485	HORVU4Hr1G079920	ibsc
4H	613733419	613734183	HORVU4Hr1G079930	ibsc
4H	613751731	613756976	HORVU4Hr1G079940	ibsc
4H	613759966	613781275	HORVU4Hr1G079950	ibsc
4H	613789679	613791820	HORVU4Hr1G079990	ibsc
4H	613793336	613797119	HORVU4Hr1G080000	ibsc
4H	613798524	613801057	HORVU4Hr1G080020	ibsc
4H	613805852	613807701	HORVU4Hr1G080030	ibsc
4H	613808586	613814590	HORVU4Hr1G080050	ibsc
4H	614013518	614015345	HORVU4Hr1G080100	ibsc
4H	614038636	614043270	HORVU4Hr1G080110	ibsc
4H	614170863	614172216	HORVU4Hr1G080120	ibsc
4H	614211929	614212000	ENSRNA049445154	tRNA-Lys
4H	614363810	614366831	HORVU4Hr1G080140	ibsc
4H	614403440	614404576	HORVU4Hr1G080150	ibsc
4H	614410389	614411827	HORVU4Hr1G080160	ibsc
4H	614419466	614419765	HORVU4Hr1G080170	ibsc
4H	614488288	614490923	HORVU4Hr1G080190	ibsc
4H	614507140	614507570	HORVU4Hr1G080220	ibsc
4H	614553639	614554136	HORVU4Hr1G080240	ibsc
4H	614656390	614657915	HORVU4Hr1G080250	ibsc
4H	614706636	614708337	HORVU4Hr1G080280	ibsc
4H	614708407	614711502	HORVU4Hr1G080290	ibsc
5H	441662	441901	HORVU5Hr1G000120	ibsc
5H	524109	526926	HORVU5Hr1G000140	ibsc
5H	542765	547180	HORVU5Hr1G000150	ibsc
5H	548492	553160	HORVU5Hr1G000170	ibsc
5H	605254	607006	HORVU5Hr1G000180	ibsc
5H	613911	615864	HORVU5Hr1G000190	ibsc
5H	697088	707701	HORVU5Hr1G000200	ibsc
5H	840249	841042	HORVU5Hr1G000220	ibsc
5H	1046550	1051684	HORVU5Hr1G000240	ibsc
5H	1070502	1071965	HORVU5Hr1G000260	ibsc
5H	1186842	1189630	HORVU5Hr1G000290	ibsc
5H	1204393	1206840	HORVU5Hr1G000300	ibsc
5H	1313687	1319573	HORVU5Hr1G000320	ibsc
5H	1319798	1320394	HORVU5Hr1G000330	ibsc
5H	1332389	1332631	HORVU5Hr1G000340	ibsc
5H	1347199	1356350	HORVU5Hr1G000370	ibsc
5H	1366636	1368644	HORVU5Hr1G000380	ibsc
5H	1406345	1407449	HORVU5Hr1G000390	ibsc
5H	1473975	1474831	HORVU5Hr1G000400	ibsc
5H	1556719	1557567	HORVU5Hr1G000420	ibsc
5H	1669924	1670286	HORVU5Hr1G000430	ibsc
5H	1716519	1716848	HORVU5Hr1G000440	ibsc
5H	1764965	1765294	HORVU5Hr1G000460	ibsc
5H	1823009	1823371	HORVU5Hr1G000470	ibsc
5H	1866137	1867914	HORVU5Hr1G000480	ibsc
5H	2020800	2022189	HORVU5Hr1G000490	ibsc
5H	2177242	2187161	HORVU5Hr1G000520	ibsc
5H	2177242	2178665	HORVU5Hr1G000510	ibsc
5H	2240314	2243412	HORVU5Hr1G000570	ibsc
5H	2253519	2257114	HORVU5Hr1G000580	ibsc
5H	2255056	2266578	HORVU5Hr1G000590	ibsc
5H	2387176	2387869	HORVU5Hr1G000620	ibsc
5H	2449040	2456113	HORVU5Hr1G000630	ibsc
5H	2449040	2550115	HORVU5Hr1G000640	ATPase3
5H	2449346	2449543	HORVU5Hr1G000650	ibsc
5H	2459121	2461351	HORVU5Hr1G000660	ibsc
5H	2540146	2540872	HORVU5Hr1G000680	ibsc
5H	2550565	2552346	HORVU5Hr1G000690	ibsc
5H	2564867	2569822	HORVU5Hr1G000700	ibsc
5H	2571047	2571619	HORVU5Hr1G000710	ibsc
5H	2606940	2607137	HORVU5Hr1G000720	ibsc
5H	2626015	2626359	HORVU5Hr1G000730	ibsc
5H	2746397	2746469	ENSRNA049910558	tRNA-Arg
5H	2752061	2756882	HORVU5Hr1G000740	ibsc
5H	2758186	2758258	ENSRNA049910756	tRNA-Arg
5H	2865222	2865809	HORVU5Hr1G000750	ibsc
5H	2881881	2890299	HORVU5Hr1G000760	ibsc
5H	2886654	2890445	HORVU5Hr1G000770	ibsc
5H	2896212	2902464	HORVU5Hr1G000780	ibsc
5H	2944133	2947962	HORVU5Hr1G000800	ibsc
5H	2945973	2946045	ENSRNA049442570	tRNA-Arg
5H	3042858	3045236	HORVU5Hr1G000820	ibsc
5H	3141079	3152916	HORVU5Hr1G000830	ibsc
5H	3192234	3192443	HORVU5Hr1G000840	ibsc
5H	3197915	3198130	ENSRNA049480928	LSU_rRNA_eukarya
5H	3238881	3239021	ENSRNA049480918	5_8S_rRNA
5H	3269240	3272050	HORVU5Hr1G000910	ibsc
5H	3324590	3328788	HORVU5Hr1G000940	ibsc
5H	3397907	3407395	HORVU5Hr1G000950	ibsc
5H	3407982	3409168	HORVU5Hr1G000970	ibsc
5H	3438543	3442516	HORVU5Hr1G000980	ibsc
5H	3444014	3444154	HORVU5Hr1G000990	ibsc
5H	3497868	3501098	HORVU5Hr1G001000	ibsc
5H	3542624	3573881	HORVU5Hr1G001020	ibsc
5H	3663036	3666034	HORVU5Hr1G001030	ibsc
5H	3673560	3683376	HORVU5Hr1G001060	ibsc
5H	3739554	3742570	HORVU5Hr1G001080	ibsc
5H	3761222	3766664	HORVU5Hr1G001090	ibsc
5H	3769420	3769979	HORVU5Hr1G001110	ibsc
5H	3874004	3874463	HORVU5Hr1G001130	ibsc
5H	3874658	3874945	HORVU5Hr1G001140	ibsc
5H	3875303	3875623	HORVU5Hr1G001150	ibsc
5H	3915814	3917816	HORVU5Hr1G001170	ibsc
5H	3924122	3928957	HORVU5Hr1G001180	methyljasmonate-inducible lipoxygenase 2
5H	3962661	3968891	HORVU5Hr1G001220	ibsc
5H	4041046	4044113	HORVU5Hr1G001240	ibsc
5H	4054232	4056839	HORVU5Hr1G001250	ibsc
5H	4062434	4062985	HORVU5Hr1G001260	ibsc
5H	4063798	4066516	HORVU5Hr1G001270	ibsc
5H	4089276	4090684	HORVU5Hr1G001290	ibsc
5H	4094250	4099804	HORVU5Hr1G001300	ibsc
5H	4122876	4126991	HORVU5Hr1G001310	ibsc
5H	4127504	4129389	HORVU5Hr1G001320	ibsc
5H	4133336	4139894	HORVU5Hr1G001330	ibsc
5H	4157959	4160895	HORVU5Hr1G001360	ibsc
5H	4178203	4181384	HORVU5Hr1G001380	ibsc
5H	4181713	4184649	HORVU5Hr1G001400	ibsc
5H	4184837	4187656	HORVU5Hr1G001410	ibsc
5H	4212828	4214786	HORVU5Hr1G001420	ibsc
5H	4219180	4220749	HORVU5Hr1G001430	ibsc
5H	4276249	4277919	HORVU5Hr1G001450	ibsc
5H	4475682	4475834	HORVU5Hr1G001530	ibsc
5H	4493155	4494088	HORVU5Hr1G001540	ibsc
5H	4505840	4506893	HORVU5Hr1G001570	ibsc
5H	4561779	4563247	HORVU5Hr1G001590	ibsc
5H	4647208	4647376	HORVU5Hr1G001600	ibsc
5H	4707366	4709253	HORVU5Hr1G001650	ibsc
5H	4723603	4727771	HORVU5Hr1G001660	ibsc
5H	4729240	4734718	HORVU5Hr1G001670	ibsc
5H	4854111	4855989	HORVU5Hr1G001690	ibsc
5H	4884872	4886641	HORVU5Hr1G001720	ibsc
5H	4898094	4901932	HORVU5Hr1G001730	ibsc
5H	4931035	4931520	HORVU5Hr1G001740	ibsc
5H	5137620	5141381	HORVU5Hr1G001750	ibsc
5H	5186742	5190560	HORVU5Hr1G001780	ibsc
5H	5253798	5254913	HORVU5Hr1G001790	ibsc
5H	5262845	5265864	HORVU5Hr1G001800	ibsc
5H	5305814	5306249	HORVU5Hr1G001820	ibsc
5H	5318461	5318661	HORVU5Hr1G001830	ibsc
5H	5325073	5326536	HORVU5Hr1G001850	ibsc
5H	5331536	5335974	HORVU5Hr1G001870	ibsc
5H	5406241	5406384	HORVU5Hr1G001890	ibsc
5H	5410533	5411159	HORVU5Hr1G001900	ibsc
5H	5474114	5474534	HORVU5Hr1G001910	ibsc
5H	5558719	5563277	HORVU5Hr1G001920	ibsc
5H	5571032	5571249	HORVU5Hr1G001980	ibsc
5H	5588742	5600423	HORVU5Hr1G002000	ibsc
5H	5615657	5621886	HORVU5Hr1G002010	ibsc
5H	5685205	5702441	HORVU5Hr1G002030	ibsc
5H	5791250	5802408	HORVU5Hr1G002040	ibsc
5H	6036769	6041581	HORVU5Hr1G002090	ibsc
5H	6082629	6085349	HORVU5Hr1G002110	ibsc
5H	6090578	6152992	HORVU5Hr1G002120	ibsc
5H	6094476	6094915	HORVU5Hr1G002130	ibsc
5H	6126188	6126814	HORVU5Hr1G002140	ibsc
5H	6152069	6153106	HORVU5Hr1G002150	ibsc
5H	6155707	6155778	ENSRNA049442610	tRNA-Gln
5H	6160787	6166162	HORVU5Hr1G002180	ibsc
5H	6202976	6204358	HORVU5Hr1G002220	ibsc
5H	6312682	6312794	ENSRNA050015004	U5
5H	6353564	6361214	HORVU5Hr1G002310	ibsc
5H	6369497	6369569	ENSRNA049910753	tRNA-Arg
5H	6373405	6373477	ENSRNA049910748	tRNA-Arg
5H	6383342	6384711	HORVU5Hr1G002320	ibsc
5H	6394477	6395261	HORVU5Hr1G002330	ibsc
5H	6397989	6401597	HORVU5Hr1G002340	ibsc
5H	6416022	6418110	HORVU5Hr1G002360	ibsc
5H	6493310	6493382	ENSRNA049442631	tRNA-Arg
5H	6536031	6536832	HORVU5Hr1G002400	ibsc
5H	6641170	6642351	HORVU5Hr1G002470	ibsc
5H	6662885	6671504	HORVU5Hr1G002510	ibsc
5H	6675495	6675751	HORVU5Hr1G002540	ibsc
5H	6704370	6705429	HORVU5Hr1G002560	ibsc
5H	6780961	6782661	HORVU5Hr1G002700	ibsc
5H	6783231	6783949	HORVU5Hr1G002710	ibsc
5H	6797966	6798339	HORVU5Hr1G002720	ibsc
5H	6800231	6802870	HORVU5Hr1G002730	ibsc
5H	6842619	6843511	HORVU5Hr1G002790	ibsc
5H	6926838	6933242	HORVU5Hr1G002970	ibsc
5H	6934463	6938506	HORVU5Hr1G003000	ibsc
5H	6938718	6942772	HORVU5Hr1G003010	ibsc
5H	7125563	7126425	HORVU5Hr1G003260	ibsc
5H	7130128	7131888	HORVU5Hr1G003300	ibsc
5H	7219912	7221059	HORVU5Hr1G003510	ibsc
5H	7467691	7479956	HORVU5Hr1G003820	ibsc
5H	7558219	7562406	HORVU5Hr1G003910	ibsc
5H	7581045	7581792	HORVU5Hr1G003990	ibsc
5H	7863132	7866743	HORVU5Hr1G004160	ibsc
5H	7932727	7934162	HORVU5Hr1G004290	ibsc
5H	7954849	7962263	HORVU5Hr1G004340	ibsc
5H	8012712	8214490	HORVU5Hr1G004370	ibsc
5H	8050686	8050806	ENSRNA049480913	SNORD14
5H	8050961	8051043	ENSRNA049480851	snoR77Y
5H	8051635	8051719	ENSRNA049480871	snoU31b
5H	8052029	8052124	ENSRNA049480904	snoZ43
5H	8052228	8052321	ENSRNA049480874	snosnR60_Z15
5H	8052746	8052831	ENSRNA049480858	snoR8a
5H	8053035	8053120	ENSRNA049480867	snoR8a
5H	8053257	8053353	ENSRNA049480891	snoZ101
5H	8053468	8053551	ENSRNA049480837	snoZ102_R77
5H	8053654	8053740	ENSRNA049480863	snoZ102_R77
5H	8053813	8053910	ENSRNA049480899	snoZ101
5H	8054013	8054098	ENSRNA049480844	snoZ102_R77
5H	8054141	8054237	ENSRNA049480883	snoZ101
5H	8054459	8054556	ENSRNA049480879	snoZ101
5H	8076541	8076926	HORVU5Hr1G004480	ibsc
5H	8097994	8098515	HORVU5Hr1G004490	ibsc
5H	8153682	8153804	HORVU5Hr1G004500	ibsc
5H	8158649	8200009	HORVU5Hr1G004510	ibsc
5H	8162338	8162460	HORVU5Hr1G004520	ibsc
5H	8233907	8233980	ENSRNA049480848	Intron_gpII
5H	8234063	8234533	HORVU5Hr1G004530	ibsc
5H	8235647	8235737	HORVU5Hr1G004540	ibsc
5H	8237085	8237198	HORVU5Hr1G004550	ibsc
5H	8237437	8237790	HORVU5Hr1G004560	ibsc
5H	8238524	8238736	HORVU5Hr1G004570	ibsc
5H	8239168	8241767	HORVU5Hr1G004580	ibsc
5H	8240086	8240271	ENSRNA049480922	IsrR
5H	8245627	8245813	HORVU5Hr1G004610	ibsc
5H	8247005	8248629	HORVU5Hr1G004620	ibsc
5H	8248806	8248889	ENSRNA049480827	Intron_gpII
5H	8248932	8250504	HORVU5Hr1G004630	ibsc
5H	8250343	8250558	HORVU5Hr1G004640	ibsc
5H	8250621	8250871	HORVU5Hr1G004650	ibsc
5H	8250888	8251385	HORVU5Hr1G004660	ibsc
5H	8250994	8251407	HORVU5Hr1G004670	ibsc
5H	8293237	8296906	HORVU5Hr1G004700	ibsc
5H	8348616	8349305	HORVU5Hr1G004790	ibsc
5H	8371043	8375040	HORVU5Hr1G004830	ibsc
5H	8398335	8399227	HORVU5Hr1G004870	ibsc
5H	8448245	8449155	HORVU5Hr1G004990	ibsc
5H	8469743	8471253	HORVU5Hr1G005000	ibsc
5H	8505721	8506663	HORVU5Hr1G005030	ibsc
5H	8518356	8523082	HORVU5Hr1G005080	ibsc
5H	8592632	8594860	HORVU5Hr1G005170	ibsc
5H	8595475	8737025	HORVU5Hr1G005180	ibsc
5H	8603703	8604574	HORVU5Hr1G005190	ibsc
5H	8608310	8608836	HORVU5Hr1G005210	ibsc
5H	8650476	8651409	HORVU5Hr1G005240	ibsc
5H	8726590	8728770	HORVU5Hr1G005280	ibsc
5H	8764295	8765150	HORVU5Hr1G005290	ibsc
5H	8765965	8766480	HORVU5Hr1G005300	ibsc
5H	8830987	8832925	HORVU5Hr1G005310	ibsc
5H	8866651	8881611	HORVU5Hr1G005340	ibsc
5H	8895092	8895364	HORVU5Hr1G005360	ibsc
5H	8898239	8898415	HORVU5Hr1G005370	ibsc
5H	8902839	8903054	HORVU5Hr1G005390	ibsc
5H	8905769	8907002	HORVU5Hr1G005410	ibsc
5H	8907004	8913753	HORVU5Hr1G005420	ibsc
5H	8907878	8908063	HORVU5Hr1G005430	ibsc
5H	8909218	8911416	HORVU5Hr1G005440	ibsc
5H	8913855	8914360	HORVU5Hr1G005450	ibsc
5H	8914610	8915140	HORVU5Hr1G005460	ibsc
5H	8915354	8915659	HORVU5Hr1G005470	ibsc
5H	8915933	8916382	HORVU5Hr1G005480	ibsc
5H	8916508	8918024	HORVU5Hr1G005490	ibsc
5H	8918191	8919151	HORVU5Hr1G005500	ibsc
5H	8927171	8927409	HORVU5Hr1G005510	ibsc
5H	8979304	8980745	HORVU5Hr1G005530	ibsc
5H	8985638	8986582	HORVU5Hr1G005550	ibsc
5H	8993441	8993656	HORVU5Hr1G005570	ibsc
5H	9085807	9091749	HORVU5Hr1G005650	ibsc
5H	9252025	9255073	HORVU5Hr1G005740	ibsc
5H	9283171	9290621	HORVU5Hr1G005770	ibsc
5H	9288150	9292462	HORVU5Hr1G005780	ibsc
5H	9430272	9431296	HORVU5Hr1G005830	ibsc
5H	9435667	9435990	HORVU5Hr1G005850	ibsc
5H	9469326	9483847	HORVU5Hr1G005860	ibsc
5H	9497612	9497997	HORVU5Hr1G005870	ibsc
5H	9528100	9529660	HORVU5Hr1G005880	ibsc
5H	9552844	9553570	HORVU5Hr1G005890	ibsc
5H	9599499	9600567	HORVU5Hr1G005910	ibsc
5H	9686232	9692522	HORVU5Hr1G005920	ibsc
5H	9696771	9697587	HORVU5Hr1G005930	ibsc
5H	9855357	9864286	HORVU5Hr1G005980	ibsc
5H	9860944	9864179	HORVU5Hr1G005990	ibsc
5H	9866256	9870141	HORVU5Hr1G006000	ibsc
5H	9900663	9901655	HORVU5Hr1G006020	ibsc
5H	9910155	9911380	HORVU5Hr1G006030	ibsc
5H	9928230	9932577	HORVU5Hr1G006040	ibsc
5H	9981219	9983223	HORVU5Hr1G006100	ibsc
5H	10156146	10160096	HORVU5Hr1G006170	ibsc
5H	10171110	10174793	HORVU5Hr1G006180	ibsc
5H	10177109	10178404	HORVU5Hr1G006190	ibsc
5H	10350186	10353997	HORVU5Hr1G006220	ibsc
5H	10638212	10641950	HORVU5Hr1G006280	ibsc
5H	10688629	10693363	HORVU5Hr1G006290	ibsc
5H	10748984	10754978	HORVU5Hr1G006310	ibsc
5H	10955205	10956629	HORVU5Hr1G006320	ibsc
5H	11067323	11069355	HORVU5Hr1G006330	ibsc
5H	11071197	11071957	HORVU5Hr1G006340	ibsc
5H	11087994	11093681	HORVU5Hr1G006350	ibsc
5H	11101198	11110128	HORVU5Hr1G006360	ibsc
5H	11135617	11145146	HORVU5Hr1G006390	ibsc
5H	11302388	11305853	HORVU5Hr1G006400	ibsc
5H	11397061	11400051	HORVU5Hr1G006430	ibsc
5H	11573278	11574749	HORVU5Hr1G006510	ibsc
5H	11577383	11582615	HORVU5Hr1G006520	ibsc
5H	11766169	11768570	HORVU5Hr1G006550	ibsc
5H	11830793	11831188	HORVU5Hr1G006570	ibsc
5H	11838440	11839325	HORVU5Hr1G006600	ibsc
5H	11882546	11883286	HORVU5Hr1G006620	ibsc
5H	11885724	11887314	HORVU5Hr1G006630	ibsc
5H	11891568	11907453	HORVU5Hr1G006640	ibsc
5H	11929101	11930855	HORVU5Hr1G006670	ibsc
5H	12035417	12041558	HORVU5Hr1G006710	ibsc
5H	12035418	12037529	HORVU5Hr1G006720	ibsc
5H	12058959	12064320	HORVU5Hr1G006730	ibsc
5H	12064810	12065837	HORVU5Hr1G006740	ibsc
5H	12136006	12137306	HORVU5Hr1G006750	ibsc
5H	12210978	12216479	HORVU5Hr1G006780	HvMS
5H	12221940	12222117	HORVU5Hr1G006790	ibsc
5H	12295331	12295471	HORVU5Hr1G006820	ibsc
5H	12300707	12302541	HORVU5Hr1G006830	ibsc
5H	12329704	12334680	HORVU5Hr1G006850	ibsc
5H	12379341	12381727	HORVU5Hr1G006880	ibsc
5H	12449138	12456304	HORVU5Hr1G006900	ibsc
5H	12496460	12498748	HORVU5Hr1G006910	ibsc
5H	12581785	12598501	HORVU5Hr1G006930	ibsc
5H	12610927	12611702	HORVU5Hr1G006950	ibsc
5H	12612254	12796477	HORVU5Hr1G006960	ibsc
5H	12665805	12668696	HORVU5Hr1G006970	ibsc
5H	12671698	12672590	HORVU5Hr1G006980	ibsc
5H	12690705	12691788	HORVU5Hr1G006990	ibsc
5H	12692121	12692288	HORVU5Hr1G007000	ibsc
5H	12760533	12760820	HORVU5Hr1G007010	ibsc
5H	12761331	12762113	HORVU5Hr1G007020	ibsc
5H	12837687	12841117	HORVU5Hr1G007030	ibsc
5H	12843990	12849234	HORVU5Hr1G007040	ibsc
5H	13032905	13036977	HORVU5Hr1G007050	ibsc
5H	13089392	13092478	HORVU5Hr1G007060	ibsc
5H	13094853	13100100	HORVU5Hr1G007080	ibsc
5H	13116526	13117901	HORVU5Hr1G007090	ibsc
5H	13223852	13230200	HORVU5Hr1G007130	ibsc
6H	354662057	354662313	HORVU6Hr1G055720	ibsc
6H	355014413	355020602	HORVU6Hr1G055740	ibsc
6H	355019832	355029490	HORVU6Hr1G055750	ibsc
6H	355061942	355064521	HORVU6Hr1G055760	ibsc
6H	355064418	355065120	HORVU6Hr1G055770	ibsc
6H	355065337	355065492	ENSRNA049485973	5_8S_rRNA
6H	355205421	355205597	HORVU6Hr1G055790	ibsc
6H	355206899	355207690	HORVU6Hr1G055810	ibsc
6H	355516468	355521532	HORVU6Hr1G055820	ibsc
6H	355853928	355855079	HORVU6Hr1G055830	ibsc
6H	355915044	355922845	HORVU6Hr1G055840	ibsc
6H	355925677	355926007	HORVU6Hr1G055850	ibsc
6H	356023662	356027552	HORVU6Hr1G055870	ibsc
6H	356174741	356176591	HORVU6Hr1G055890	ibsc
6H	356176753	356177389	HORVU6Hr1G055900	ibsc
6H	356233321	356240924	HORVU6Hr1G055910	ibsc
6H	356285254	356285890	HORVU6Hr1G055920	ibsc
6H	356286052	356287902	HORVU6Hr1G055930	ibsc
6H	356677679	356682060	HORVU6Hr1G055960	ibsc
6H	357473643	357477273	HORVU6Hr1G055990	ibsc
6H	357490863	357492603	HORVU6Hr1G056000	ibsc
6H	359025730	359026959	HORVU6Hr1G056080	ibsc
6H	359587382	359590244	HORVU6Hr1G056110	ibsc
6H	359700138	359701528	HORVU6Hr1G056140	ibsc
6H	360128234	360131520	HORVU6Hr1G056160	ibsc
6H	360158563	360161393	HORVU6Hr1G056170	ibsc
6H	360335318	360339964	HORVU6Hr1G056180	ibsc
6H	360467304	360471738	HORVU6Hr1G056200	ibsc
6H	361061379	361066837	HORVU6Hr1G056230	ibsc
6H	361523074	361530287	HORVU6Hr1G056260	ibsc
6H	361528654	361534239	HORVU6Hr1G056280	ibsc
6H	362010890	362011407	HORVU6Hr1G056320	ibsc
6H	362018832	362020413	HORVU6Hr1G056350	ibsc
6H	362131149	362131457	HORVU6Hr1G056360	ibsc
6H	362799109	362799504	HORVU6Hr1G056390	ibsc
6H	363543259	363543836	HORVU6Hr1G056440	ibsc
6H	363544252	363544528	HORVU6Hr1G056450	ibsc
6H	363827265	363828984	HORVU6Hr1G056460	ibsc
6H	364354426	364362218	HORVU6Hr1G056490	ibsc
6H	364361658	364361906	HORVU6Hr1G056500	ibsc
6H	364674131	364675849	HORVU6Hr1G056510	ibsc
6H	364687130	364687606	HORVU6Hr1G056530	ibsc
6H	364806060	364807354	HORVU6Hr1G056550	ibsc
6H	364807703	364809654	HORVU6Hr1G056560	ibsc
6H	365305405	365306903	HORVU6Hr1G056570	ibsc
6H	365338515	365339814	HORVU6Hr1G056600	ibsc
6H	365341314	365344671	HORVU6Hr1G056610	ibsc
6H	365561441	365562258	HORVU6Hr1G056640	ibsc
6H	365571507	365572328	HORVU6Hr1G056650	ibsc
6H	365575205	365575694	HORVU6Hr1G056660	ibsc
6H	365577612	365577731	HORVU6Hr1G056670	ibsc
6H	365592847	365593209	HORVU6Hr1G056690	ibsc
6H	365609716	365609993	HORVU6Hr1G056710	ibsc
6H	365643300	365648939	HORVU6Hr1G056720	ibsc
6H	365654353	365661604	HORVU6Hr1G056750	ibsc
6H	366307565	366307869	HORVU6Hr1G056840	ibsc
6H	366307654	366307815	ENSRNA049468778	SSU_rRNA_eukarya
6H	366312255	366316126	HORVU6Hr1G056850	ibsc
6H	366398977	366404290	HORVU6Hr1G056860	ibsc
6H	366525146	366525352	HORVU6Hr1G056880	ibsc
6H	366540276	366540662	HORVU6Hr1G056890	ibsc
6H	367334216	367339730	HORVU6Hr1G056910	ibsc
6H	368018443	368024953	HORVU6Hr1G056950	ibsc
6H	368153191	368153617	HORVU6Hr1G056970	ibsc
6H	368157076	368157417	HORVU6Hr1G056980	ibsc
6H	368521409	368528223	HORVU6Hr1G057060	ibsc
6H	368579325	368579671	HORVU6Hr1G057070	ibsc
6H	368958667	368961721	HORVU6Hr1G057080	ibsc
6H	368964871	368968449	HORVU6Hr1G057090	ibsc
6H	368968909	368972122	HORVU6Hr1G057100	ibsc
6H	369306242	369310633	HORVU6Hr1G057110	ibsc
6H	369819720	369821933	HORVU6Hr1G057130	ibsc
6H	370396139	370400943	HORVU6Hr1G057140	ibsc
6H	370428133	370430644	HORVU6Hr1G057170	ibsc
6H	372099616	372104194	HORVU6Hr1G057240	ibsc
6H	372241739	372242260	HORVU6Hr1G057250	ibsc
6H	372361498	372367610	HORVU6Hr1G057260	ibsc
6H	372657528	372658223	HORVU6Hr1G057270	ibsc
6H	372863789	372865566	HORVU6Hr1G057370	ibsc
6H	372865663	372873191	HORVU6Hr1G057380	ibsc
6H	373047882	373048403	HORVU6Hr1G057450	ibsc
6H	373225808	373226329	HORVU6Hr1G057480	ibsc
6H	373416300	373418044	HORVU6Hr1G057490	ibsc
6H	373418735	373425452	HORVU6Hr1G057500	ibsc
6H	373609879	373610542	HORVU6Hr1G057510	ibsc
6H	373611651	373617369	HORVU6Hr1G057520	ibsc
6H	373920972	373948299	HORVU6Hr1G057550	ibsc
6H	374242958	374272688	HORVU6Hr1G057560	ibsc
6H	374488067	374526780	HORVU6Hr1G057570	ibsc
6H	374510623	374515778	HORVU6Hr1G057580	ibsc
6H	374526309	374529601	HORVU6Hr1G057590	ibsc
6H	374644385	374644480	ENSRNA049469001	SNORD25
6H	374866561	374869556	HORVU6Hr1G057630	ibsc
6H	374875965	374877962	HORVU6Hr1G057640	ibsc
6H	375051007	375051719	HORVU6Hr1G057660	ibsc
6H	375132831	375134777	HORVU6Hr1G057670	ibsc
6H	375201977	375208081	HORVU6Hr1G057680	ibsc
6H	375212029	375212529	HORVU6Hr1G057690	ibsc
6H	375355456	375357389	HORVU6Hr1G057700	ibsc
6H	510427410	510427607	HORVU6Hr1G073700	ibsc
6H	510476804	510480423	HORVU6Hr1G073710	ibsc
6H	510477067	510477469	HORVU6Hr1G073720	ibsc
6H	510606867	510609386	HORVU6Hr1G073730	ibsc
6H	510710893	510717907	HORVU6Hr1G073740	ibsc
6H	510886713	510887029	HORVU6Hr1G073820	ibsc
6H	510887291	510887526	HORVU6Hr1G073830	ibsc
6H	510937378	510938696	HORVU6Hr1G073850	ibsc
6H	511241884	511244827	HORVU6Hr1G073880	ibsc
6H	511487961	511490910	HORVU6Hr1G073910	ibsc
6H	511504399	511506757	HORVU6Hr1G073930	ibsc
6H	511993651	511993833	HORVU6Hr1G073960	ibsc
6H	512005558	512009338	HORVU6Hr1G073980	ibsc
6H	512017520	512018758	HORVU6Hr1G073990	ibsc
6H	512150891	512156040	HORVU6Hr1G074020	ibsc
6H	512158867	512163479	HORVU6Hr1G074030	GS1a
6H	512184095	512190773	HORVU6Hr1G074040	ibsc
6H	512225967	512227677	HORVU6Hr1G074060	ibsc
6H	512551645	512554610	HORVU6Hr1G074120	ibsc
6H	512834480	512842295	HORVU6Hr1G074180	RDRP2
6H	513099539	513104681	HORVU6Hr1G074200	ibsc
6H	513108626	513115648	HORVU6Hr1G074210	ibsc
6H	513108807	513120207	HORVU6Hr1G074220	RDRP1
6H	513198667	513205151	HORVU6Hr1G074260	ibsc
6H	513346320	513346401	ENSRNA049446762	tRNA-Leu
6H	513379735	513380887	HORVU6Hr1G074290	ibsc
6H	513638023	513650788	HORVU6Hr1G074330	ibsc
6H	513681764	513686116	HORVU6Hr1G074360	ibsc
6H	513722638	513723536	HORVU6Hr1G074370	ibsc
6H	513911955	513915036	HORVU6Hr1G074410	ibsc
6H	514097241	514103959	HORVU6Hr1G074440	ibsc
6H	514114690	514116872	HORVU6Hr1G074460	ibsc
6H	514266499	514268343	HORVU6Hr1G074520	ibsc
6H	514272207	514285244	HORVU6Hr1G074540	ibsc
6H	514715353	514715472	HORVU6Hr1G074550	ibsc
6H	514756234	514762527	HORVU6Hr1G074560	ibsc
6H	514803978	514809356	HORVU6Hr1G074570	ibsc
6H	514805245	514806116	HORVU6Hr1G074580	ibsc
6H	514876557	514877615	HORVU6Hr1G074610	ibsc
6H	515006375	515007433	HORVU6Hr1G074620	ibsc
6H	515020502	515021220	HORVU6Hr1G074640	ibsc
6H	515252841	515254676	HORVU6Hr1G074650	ibsc
6H	515259014	515263166	HORVU6Hr1G074660	ibsc
6H	515295503	515297209	HORVU6Hr1G074690	ibsc
6H	515677976	515678751	HORVU6Hr1G074720	ibsc
6H	515818173	515822741	HORVU6Hr1G074730	ibsc
6H	515819283	515819426	HORVU6Hr1G074750	ibsc
6H	515870323	515870616	HORVU6Hr1G074770	ibsc
6H	515877658	515879796	HORVU6Hr1G074800	ibsc
6H	515985411	515985781	HORVU6Hr1G074810	ibsc
6H	515997014	515997362	HORVU6Hr1G074820	ibsc
6H	516000267	516000509	HORVU6Hr1G074830	ibsc
6H	516255926	516261939	HORVU6Hr1G074860	ibsc
6H	516260489	516262909	HORVU6Hr1G074870	ibsc
6H	516300991	516303248	HORVU6Hr1G074900	ibsc
6H	516329882	516333868	HORVU6Hr1G074910	ibsc
6H	516352179	516352349	HORVU6Hr1G074920	ibsc
6H	516519409	516522218	HORVU6Hr1G074930	ibsc
6H	516523370	516524934	HORVU6Hr1G074940	ibsc
6H	516731100	516731222	HORVU6Hr1G074950	ibsc
6H	516792242	516795497	HORVU6Hr1G074960	ibsc
7H	81898648	81898971	HORVU7Hr1G036030	ibsc
7H	82069956	82072776	HORVU7Hr1G036050	ibsc
7H	82143197	82144887	HORVU7Hr1G036060	ibsc
7H	82159515	82315426	HORVU7Hr1G036070	ibsc
7H	82420611	82440422	HORVU7Hr1G036090	ibsc
7H	82606178	82608892	HORVU7Hr1G036100	ibsc
7H	82650592	82654618	HORVU7Hr1G036110	ibsc
7H	82861778	82862187	HORVU7Hr1G036120	ibsc
7H	82946101	82953235	HORVU7Hr1G036130	VRT-2
7H	82948556	82952709	HORVU7Hr1G036140	ibsc
7H	83249502	83256458	HORVU7Hr1G036160	ibsc
7H	83278127	83361679	HORVU7Hr1G036170	ibsc
7H	83278444	83279568	HORVU7Hr1G036180	ibsc
7H	83526144	83528759	HORVU7Hr1G036220	ibsc
7H	83526144	83527023	HORVU7Hr1G036210	ibsc
7H	83610089	83611469	HORVU7Hr1G036280	ibsc
7H	83636776	83636944	HORVU7Hr1G036290	ibsc
7H	83687924	83688669	HORVU7Hr1G036310	ibsc
7H	84006342	84008301	HORVU7Hr1G036330	ibsc
7H	84228373	84229694	HORVU7Hr1G036370	ibsc
7H	84257259	84259784	HORVU7Hr1G036380	ibsc
7H	84513601	84515107	HORVU7Hr1G036390	ibsc
7H	84565373	84567309	HORVU7Hr1G036410	ibsc
7H	84565660	84569896	HORVU7Hr1G036420	ibsc
7H	84582201	84583778	HORVU7Hr1G036430	ibsc
7H	84627463	84627646	HORVU7Hr1G036440	ibsc
7H	84642367	84646994	HORVU7Hr1G036450	ibsc
7H	84700862	84702674	HORVU7Hr1G036460	ibsc
7H	84846525	85031979	HORVU7Hr1G036470	ibsc
7H	84877115	84973527	HORVU7Hr1G036500	ibsc
7H	85198537	85200424	HORVU7Hr1G036520	ibsc
7H	85341169	85462185	HORVU7Hr1G036540	ibsc
7H	85490557	85490959	HORVU7Hr1G036560	ibsc
7H	85583625	85584772	HORVU7Hr1G036570	ibsc
7H	85850542	85854380	HORVU7Hr1G036660	ibsc
7H	86004773	86010024	HORVU7Hr1G036690	ibsc
7H	86019115	86020406	HORVU7Hr1G036710	ibsc
7H	86174535	86175625	HORVU7Hr1G036720	GER2a
7H	86728212	86728662	HORVU7Hr1G036760	ibsc
7H	86739806	86794491	HORVU7Hr1G036780	ibsc
7H	86964650	86965198	HORVU7Hr1G036800	ibsc
7H	29565423	29566921	HORVU7Hr1G021160	ibsc
7H	29624887	29625159	HORVU7Hr1G021170	ibsc
7H	29713701	29717335	HORVU7Hr1G021180	ibsc
7H	29725017	29728427	HORVU7Hr1G021190	ibsc
7H	29728364	29731353	HORVU7Hr1G021200	ibsc
7H	29823372	29825265	HORVU7Hr1G021230	ibsc
7H	29839006	29842153	HORVU7Hr1G021250	ibsc
7H	166242730	166246330	HORVU7Hr1G048560	ibsc
7H	166253740	166258330	HORVU7Hr1G048570	ibsc
7H	166515235	166515321	ENSRNA049488507	mir-160
7H	166516236	166523715	HORVU7Hr1G048620	ibsc
7H	166608927	166611038	HORVU7Hr1G048650	ibsc
7H	166622537	166623931	HORVU7Hr1G048670	ibsc
7H	166624763	166626174	HORVU7Hr1G048680	ibsc
7H	166826520	166829936	HORVU7Hr1G048690	ibsc
7H	167067291	167071882	HORVU7Hr1G048710	ibsc
7H	167284662	167289146	HORVU7Hr1G048720	ibsc
7H	167292051	167294868	HORVU7Hr1G048730	ibsc
7H	167374282	167378123	HORVU7Hr1G048740	ibsc
7H	167776878	167778266	HORVU7Hr1G048750	ibsc
7H	167777825	167781639	HORVU7Hr1G048760	ibsc
7H	167795311	167803102	HORVU7Hr1G048770	ibsc
7H	167859243	167862663	HORVU7Hr1G048810	ibsc
7H	167861953	167864773	HORVU7Hr1G048820	ibsc
7H	168088970	168091167	HORVU7Hr1G048830	ibsc
7H	168385221	168385489	HORVU7Hr1G048840	ibsc
7H	168755789	168756524	HORVU7Hr1G048860	ibsc
7H	168758791	168764140	HORVU7Hr1G048880	ibsc
7H	168923562	168926887	HORVU7Hr1G048900	ibsc
7H	168928890	168929102	HORVU7Hr1G048910	ibsc
7H	169106278	169109392	HORVU7Hr1G048940	ibsc
7H	169113004	169113258	HORVU7Hr1G048950	ibsc
7H	169149519	169151165	HORVU7Hr1G048970	ibsc
7H	169617599	169617814	HORVU7Hr1G049000	ibsc
7H	169660409	169660624	HORVU7Hr1G049020	ibsc
7H	169665984	169666240	HORVU7Hr1G049040	ibsc
7H	169796781	169801464	HORVU7Hr1G049050	ibsc
7H	169947787	169949642	HORVU7Hr1G049070	ibsc
7H	170173103	170175173	HORVU7Hr1G049080	ibsc
7H	170406844	170411287	HORVU7Hr1G049090	ibsc
7H	170716272	170722774	HORVU7Hr1G049110	ibsc
7H	170723442	170725809	HORVU7Hr1G049130	ibsc
[truncated: 982 more rows]
